# Supplementary material for: Synthesis, photophysical and anticancer study of D-ring extended estrone analogues
Source: Royal Society of Chemistry journal article supplement (doi:10.1039/c5ra11112a), 2015-01-01

RSC Advances  
**Supplementary Information**

## Synthesis, photophysical and anticancer study of D-ring extended estrone analogues

Hardesh K. Maurya,<sup>a</sup> Mohammad Hasanain,<sup>b</sup> Ch Pavan Kumar,<sup>c</sup> Prema G. Vasudeva,<sup>d</sup> Jayanta Sarkar,<sup>b</sup> M. Chandrasekharam<sup>c</sup> and Atul Gupta<sup>\*a</sup>

### 1. Supplementary Figure 1:

(a)

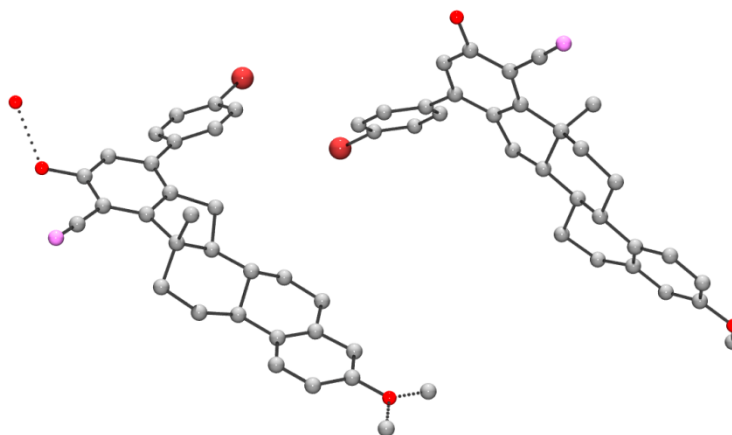

(b)

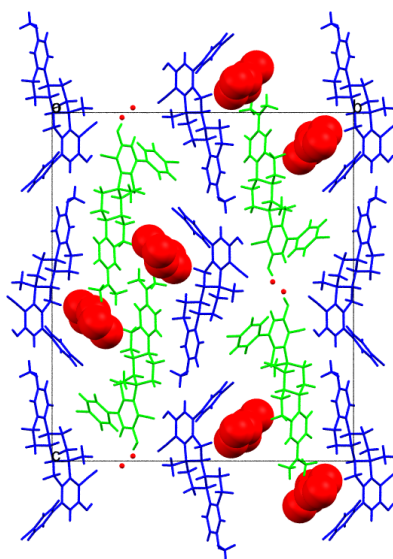

**Figure S1.** (a) A view of the asymmetric unit of **8** in crystals. Hydrogen atoms are not shown for clarity. Bonds to the disordered methyl groups in OMe moiety and a hydrogen bond to the co-crystallized water molecule are shown in dotted lines. (b) Packing of molecules in the crystals of **8** when viewed down the crystallographic a-axis. The two independent molecules are shown in

## RSC Advances

different colors (Mol-1 in green, Mol-2 in Blue). Disordered water molecules (shown as bigger balls in red color) form a continuous channel and not connected to the steroidal molecules though hydrogen bonds. The ordered water molecule which is hydrogen bonded to the hydroxyl group of molecule-1 in the asymmetric unit, is shown as smaller balls in red color.

### 2. Scanned copy of Spectra

(+)(6bS,8aS,13aS,13bS)-12-(4-bromophenyl)-4-methoxy-8a-methyl-10-(piperidin-1-yl)-2,6b,7,8,8a,13,13a,13b-octahydro-1H-indeno[2,1-a]phenanthrene-9-carbonitrile (**7a**).

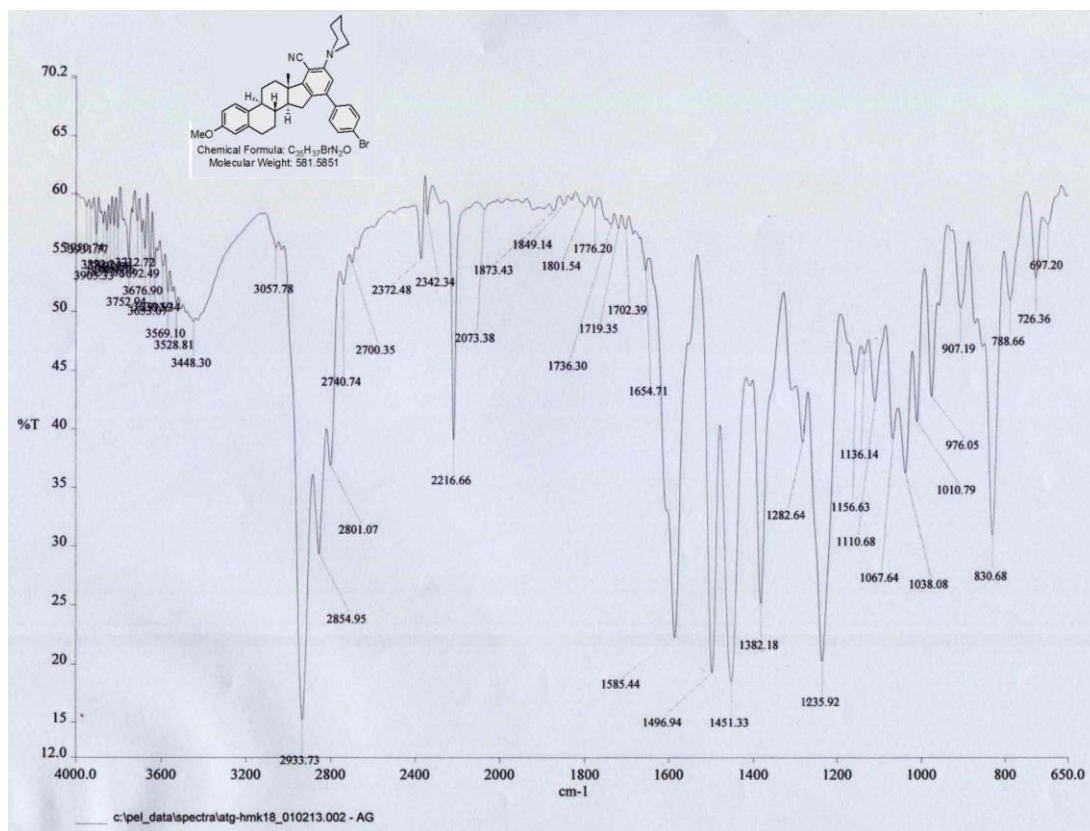

# RSC Advances

CIMAP-PROTON  
PROJECT NO.: NWP-09

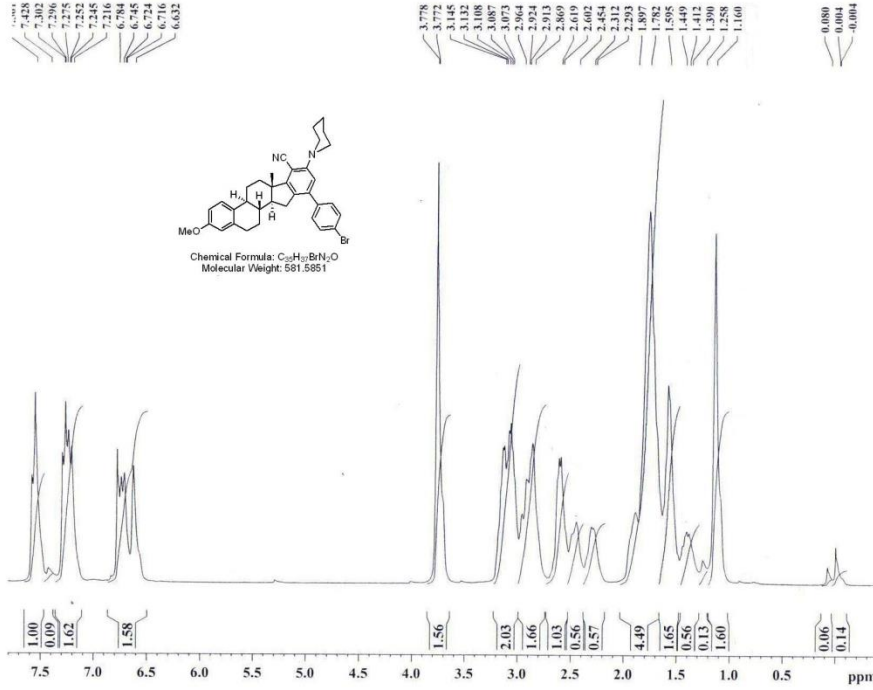

Current Data Parameters  
NAME atghmk18.p  
EXPNO 1  
PROCNO 1

F2 - Acquisition Parameters  
Date\_ 20121001  
Time 18.05  
INSTRUM spect  
PROBHD 5 mm Multinucl  
PULPROG zg30  
TD 65536  
SOLVENT CDCl3  
NS 96  
DS 2  
SWH 6172.839 Hz  
FIDRES 0.094190 Hz  
AQ 5.3084660 sec  
RG 114  
DW 81.000 usec  
DE 6.00 usec  
TE 297.7 K  
D1 1.00000000 sec  
TD0 1

CHANNEL f1

NUC1 1H  
PI 6.65 usec  
PL1 4.00 dB  
SFO1 300.1318534 MHz

F2 - Processing parameters  
SI 32768  
SF 300.1300132 MHz  
WDW EM  
SSB 0  
LB 0.30 Hz  
GB 0  
PC 1.40

CIMAP-PROTON  
PROJECT NO.: NWP-09

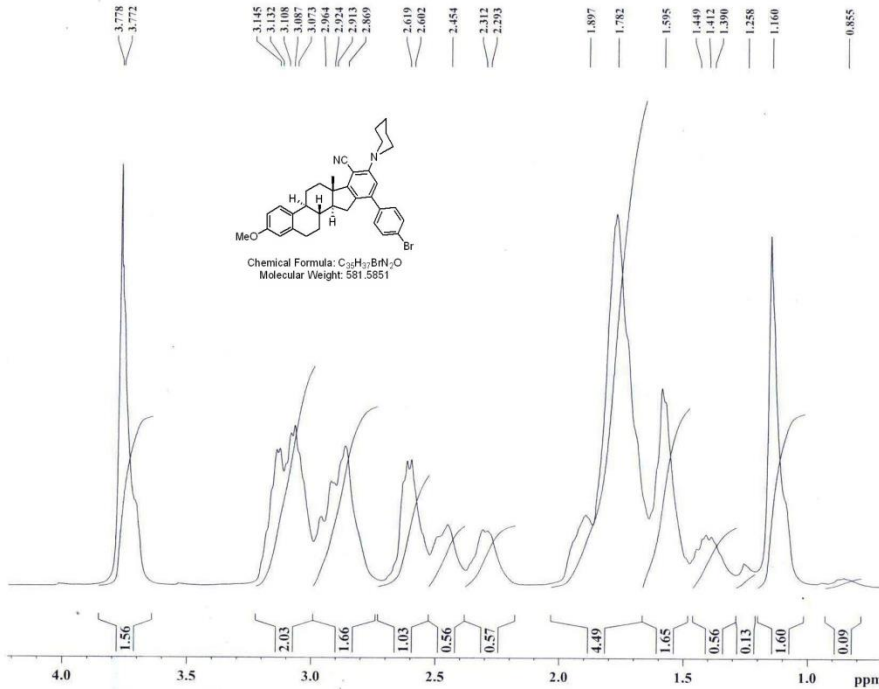

Current Data Parameters  
NAME atghmk18.p  
EXPNO 1  
PROCNO 1

F2 - Acquisition Parameters  
Date\_ 20121001  
Time 18.05  
INSTRUM spect  
PROBHD 5 mm Multinucl  
PULPROG zg30  
TD 65536  
SOLVENT CDCl3  
NS 96  
DS 2  
SWH 6172.839 Hz  
FIDRES 0.094190 Hz  
AQ 5.3084660 sec  
RG 114  
DW 81.000 usec  
DE 6.00 usec  
TE 297.7 K  
D1 1.00000000 sec  
TD0 1

CHANNEL f1

NUC1 1H  
PI 6.65 usec  
PL1 4.00 dB  
SFO1 300.1318534 MHz

F2 - Processing parameters  
SI 32768  
SF 300.1300132 MHz  
WDW EM  
SSB 0  
LB 0.30 Hz  
GB 0  
PC 1.40

# RSC Advances

CIMAP-CARBON  
PROJECT NO.: MLP-04

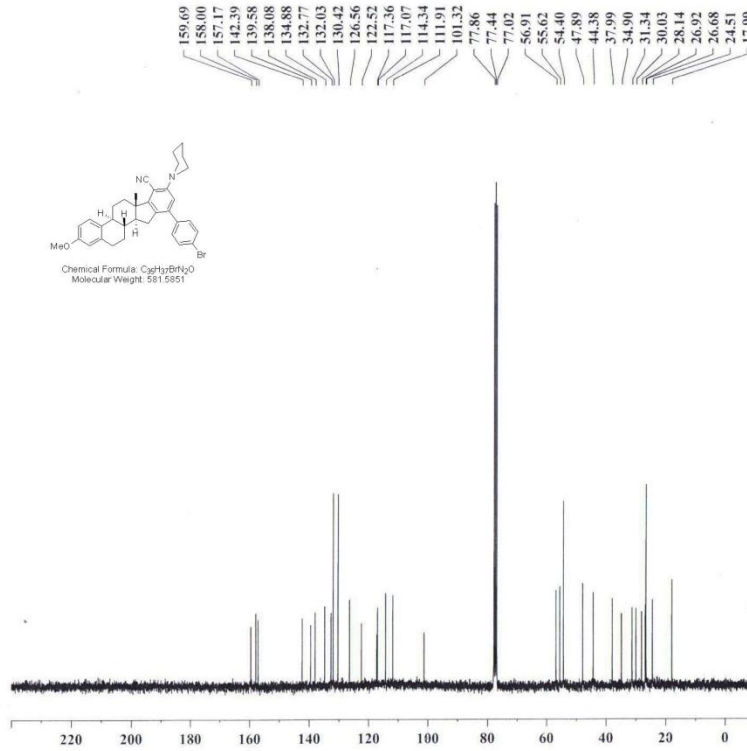

Current Data Parameters  
NAME atghmk18.p  
EXPNO 9  
PROCNO 1

F2 - Acquisition Parameters  
Date\_ 20121004  
Time 10.12  
INSTRUM spect  
PROBHD 5 mm Multinucl  
PULPROG zgpg30  
TD 65536  
SOLVENT CDCl3  
NS 1509  
DS 4  
SWH 21097.047 Hz  
FIDRES 0.321915 Hz  
AQ 1.5532532 sec  
RG 32768  
DW 23.700 usec  
DE 6.00 usec  
TE 298.1 K  
D1 2.00000000 sec  
d11 0.03000000 sec  
DELTA 1.89999998 sec  
TD0 1

CHANNEL f1  
NUC1 13C  
P1 12.50 usec  
PL1 -6.00 dB  
SFO1 75.4752950 MHz

CHANNEL f2  
CPDPRG2 waltz16  
NUC2 1H  
PCPD2 80.00 usec  
PL2 4.00 dB  
PL12 25.35 dB  
PL13 29.61 dB  
SFO2 300.1312000 MHz

F2 - Processing parameters  
SI 32768  
SF 75.4677190 MHz  
WDW EM  
SSB 0  
LB 1.00 Hz  
GB 0  
PC 1.40

CIMAP-DEPT 135  
PROJECT NO.: ILP-13

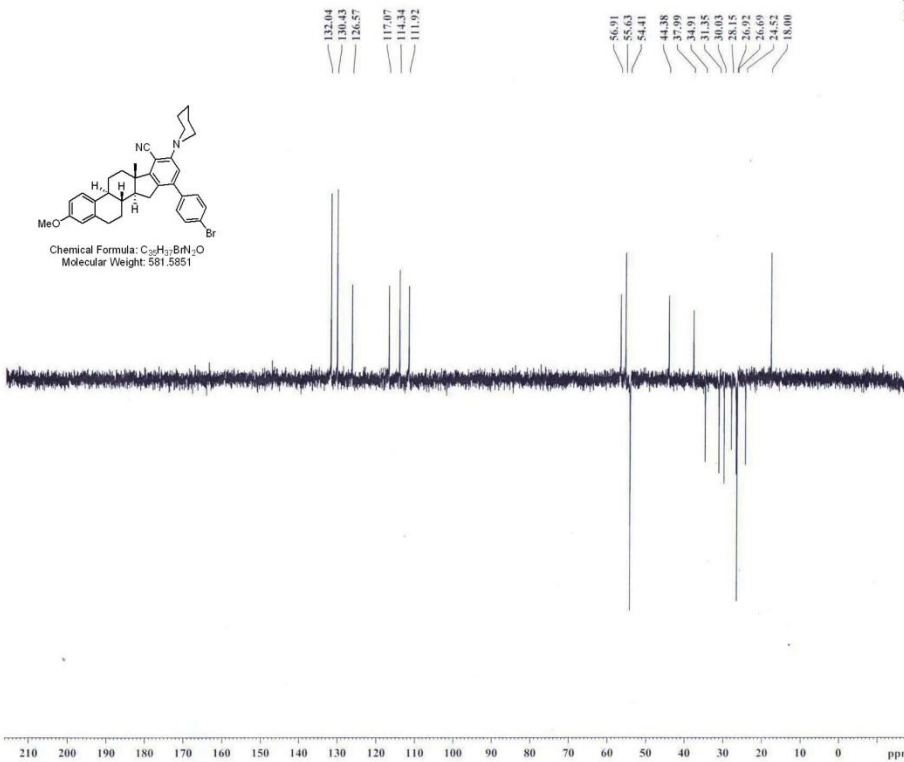

Current Data Parameters  
NAME atghmk18.p  
EXPNO 3  
PROCNO 1

F2 - Acquisition Parameters  
Date\_ 20121003  
Time 10.94  
INSTRUM spect  
PROBHD 5 mm Multinucl  
PULPROG dept135  
TD 65536  
SOLVENT CDCl3  
NS 561  
DS 4  
SWH 17985.611 Hz  
FIDRES 0.274439 Hz  
AQ 1.8219508 sec  
RG 16384  
DW 27.800 usec  
DE 6.00 usec  
TE 299.0 K  
CNST2 145.0000000  
D1 2.00000000 sec  
d2 0.0034828 sec  
d12 0.00002000 sec  
DELTA 0.00001592 sec  
TD0 1

CHANNEL f1  
NUC1 13C  
P1 12.50 usec  
PL1 25.00 usec  
PL1 -6.00 dB  
SFO1 75.4752950 MHz

CHANNEL f2  
CPDPRG2 waltz16  
NUC2 1H  
P3 6.65 usec  
P4 13.30 usec  
PCPD2 80.00 usec  
PL2 4.00 dB  
PL12 25.61 dB  
SFO2 300.1312000 MHz

F2 - Processing parameters  
SI 32768  
SF 75.4677190 MHz  
WDW EM  
SSB 0  
LB 1.00 Hz  
GB 0  
PC 1.40

COSY

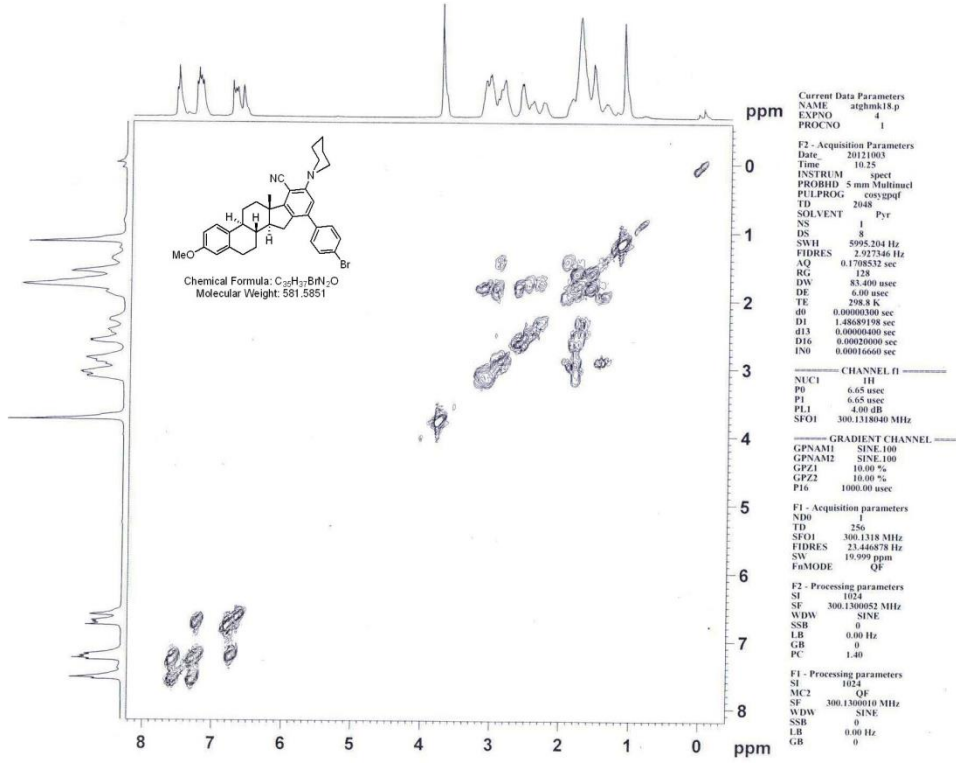

HSQC

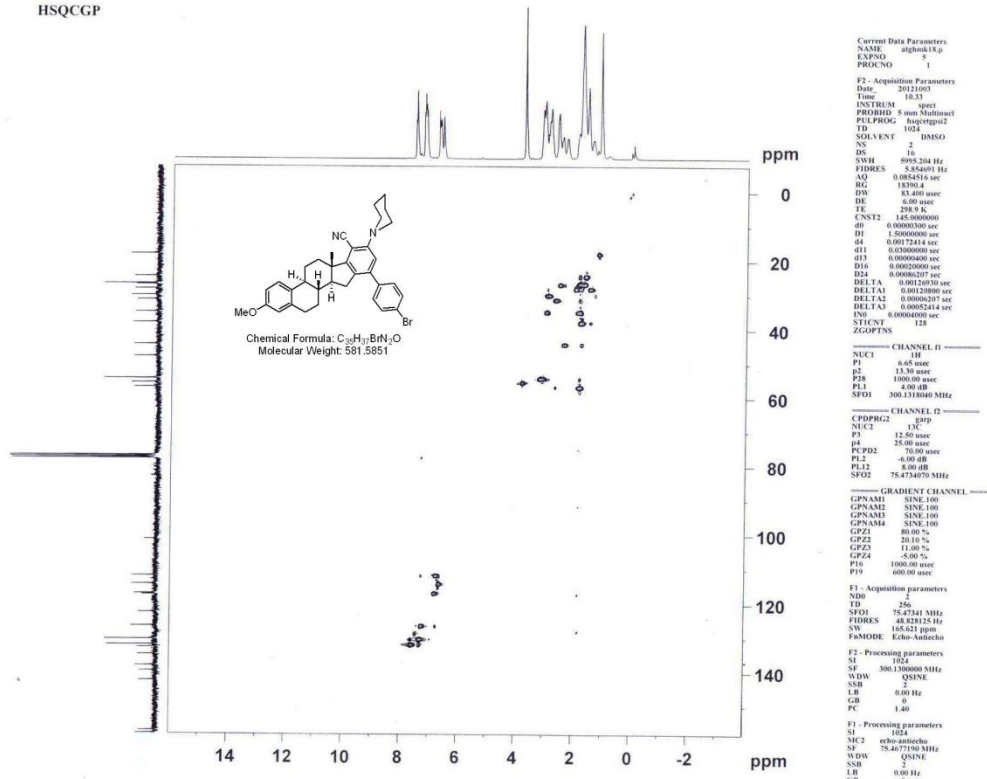

# RSC Advances

HMBC

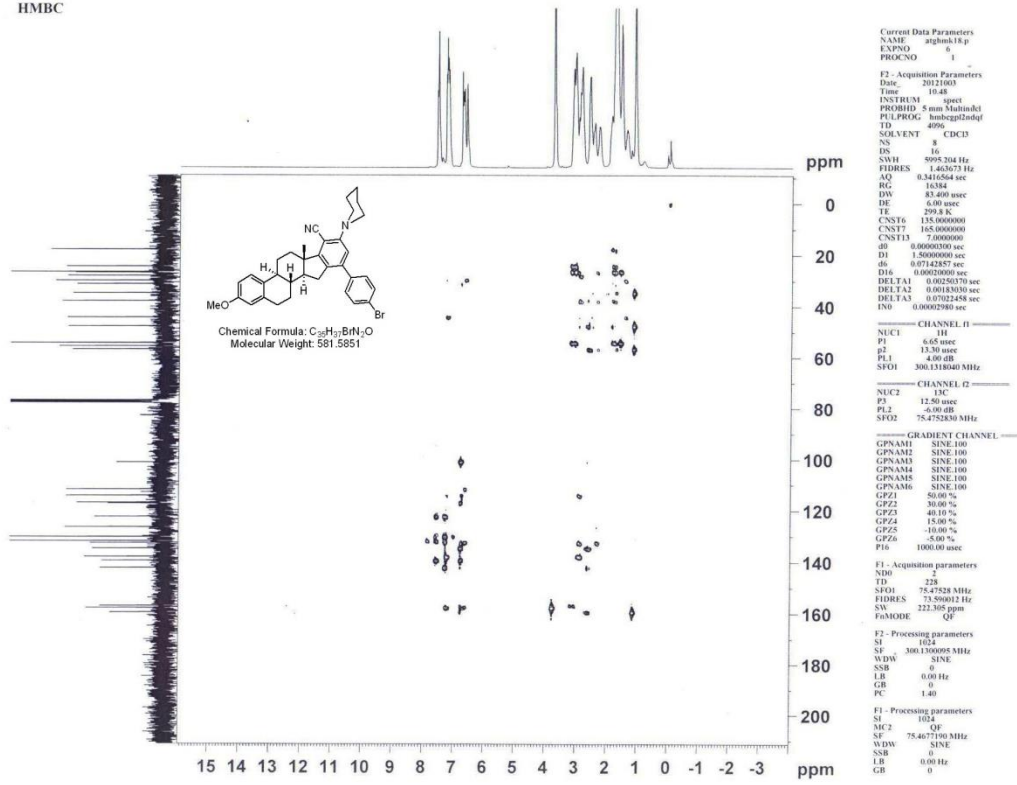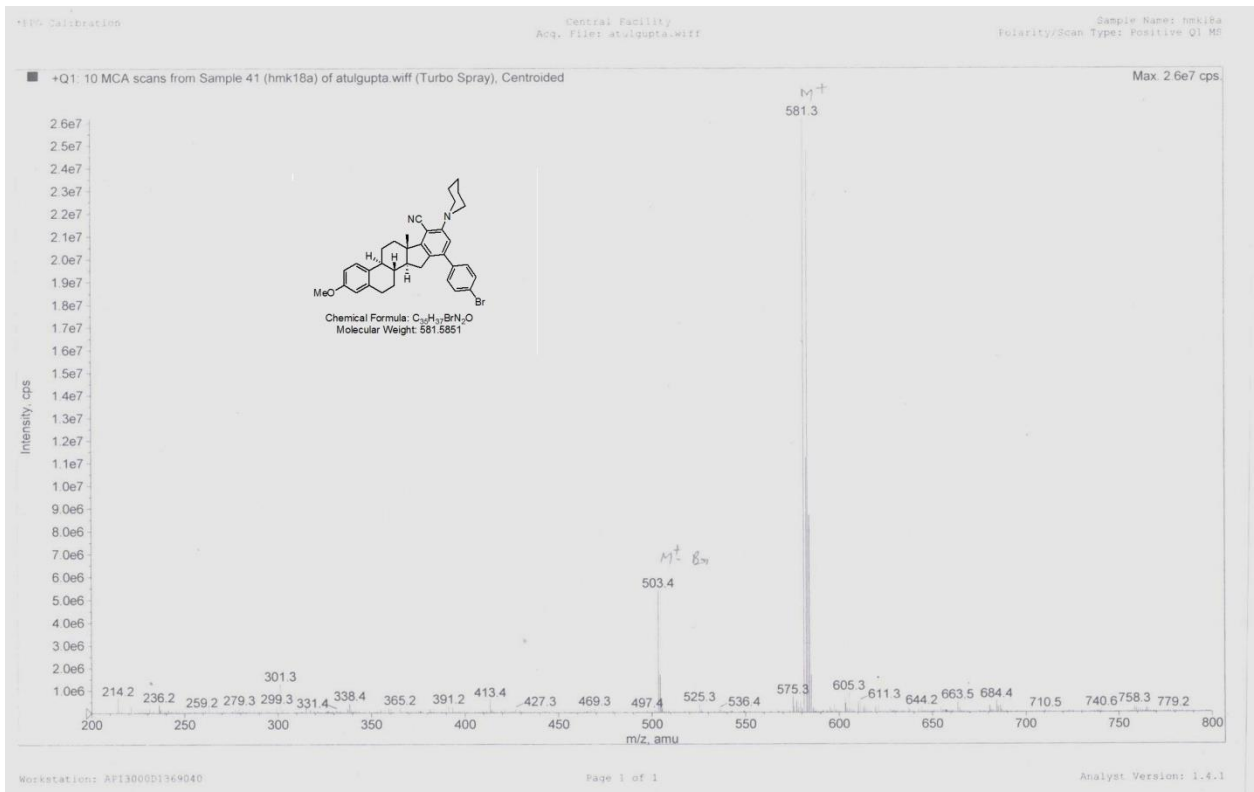

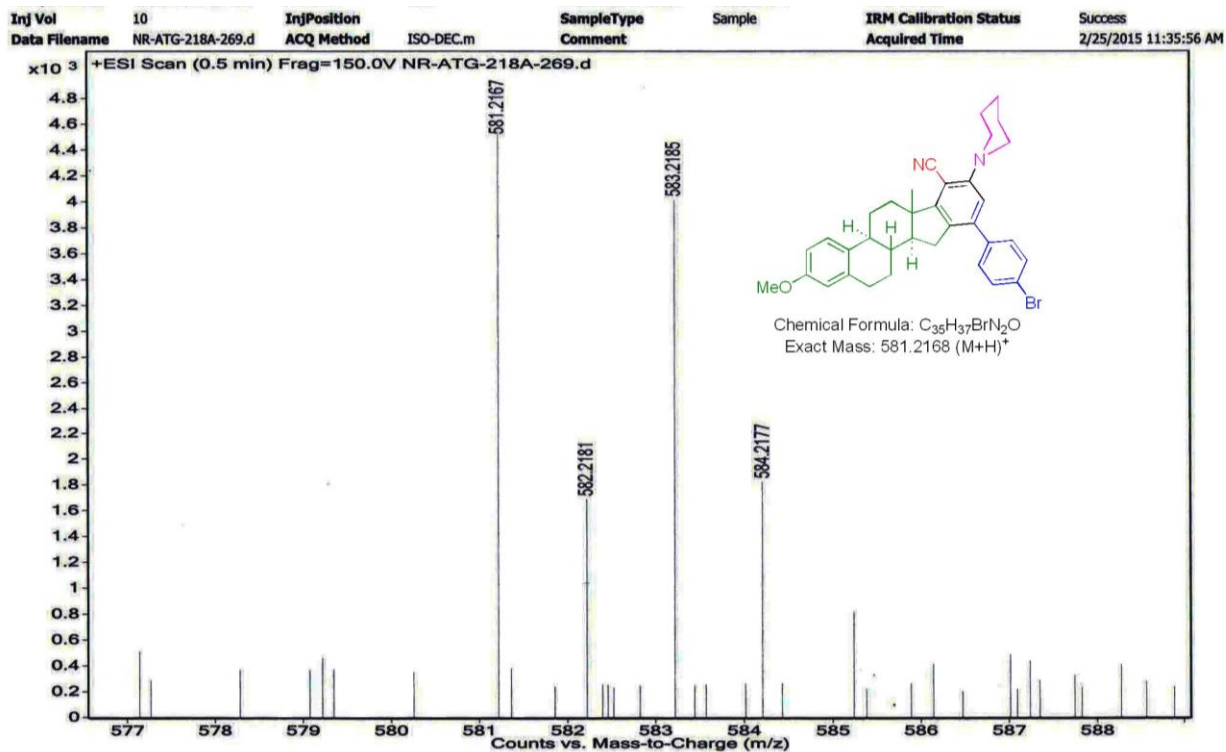

(+)(6bS,8aS,13aS,13bS)-12-(4-bromophenyl)-10-hydroxy-4-methoxy-8a-methyl-2,6b,7,8,8a,13,13a,13b-octahydro-1H-indeno[2,1-a]phenanthrene-9-carbonitrile (**8a**)

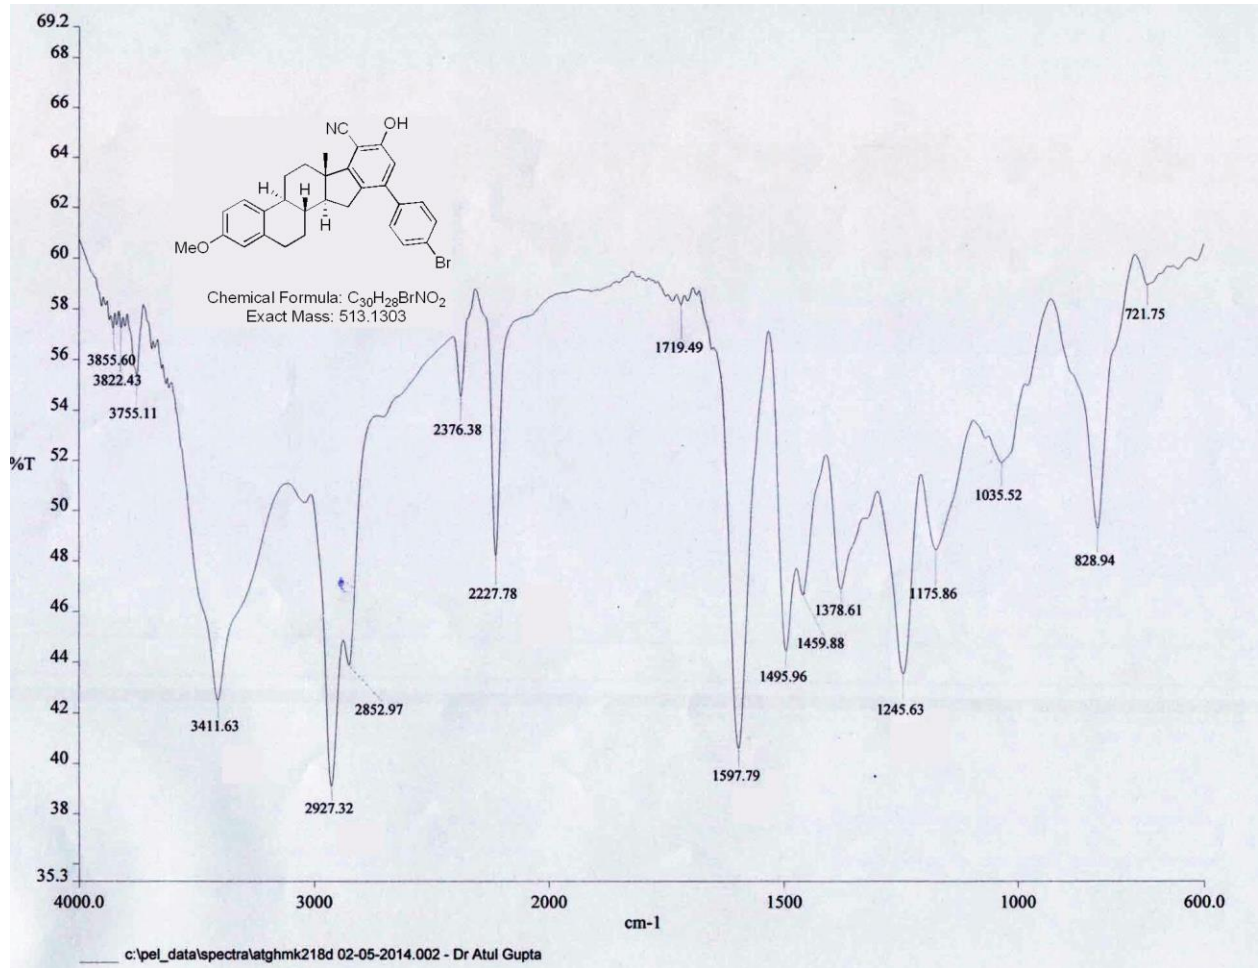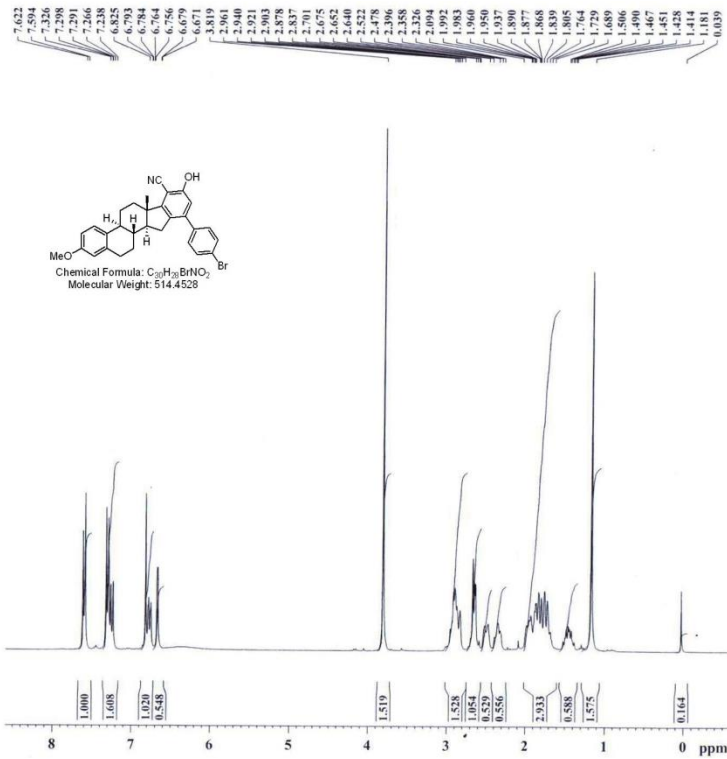

CIMAP PROTON  
PROJECT NO.: mlp-02

Current Data Parameters  
NAME atghmk218d.p  
EXPNO 1  
PROCNO 1

F2 - Acquisition Parameters  
Date\_ 20140603  
Time 11.38  
INSTRUM spect  
PROBHD 5 mm Multinuel  
PULPROG zg30  
TD 65536  
SOLVENT CDCl3  
NS 16  
DS 2  
SWH 8992.806 Hz  
FIDRES 0.137219 Hz  
AQ 3.6438515 sec  
RG 203.2  
DW 55.600 usec  
DE 6.00 usec  
TE 300.7 K  
D1 1.00000000 sec  
TD0 1

CHANNEL f1  
NUC1 1H  
P1 7.15 usec  
PL1 4.00 dB  
SFO1 300.1318534 MHz

F2 - Processing parameters  
SI 32768  
SF 300.1299972 MHz  
WDW EM  
SSB 0  
LB 0.30 Hz  
GB 0  
PC 1.40



RSC Advances

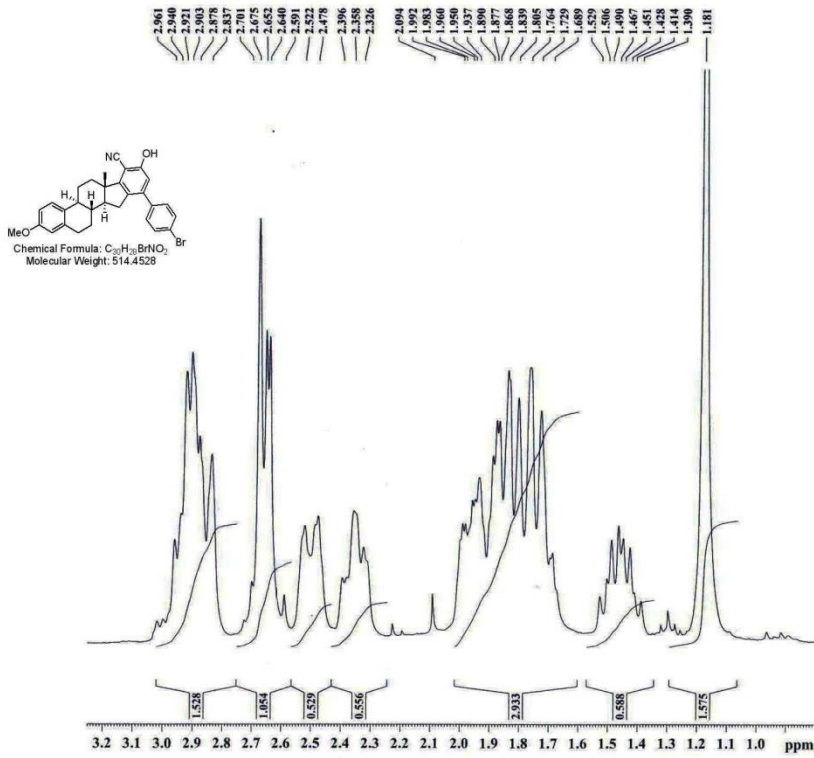

CIMAP PROTON  
PROJECT NO.: mlp-02

Current Data Parameters  
NAME atghmk218d.p  
EXPNO 1  
PROCNO 1

F2 - Acquisition Parameters  
Date 20140603  
Time 11.38  
INSTRUM spect  
PROBHD 5 mm Multinucl  
PULPROG zg30  
TD 65536  
SOLVENT CDCl3  
NS 16  
DS 2  
SWH 8992.806 Hz  
FIDRES 0.137219 Hz  
AQ 3.6438515 sec  
RG 203.2  
DW 55.600 usec  
DE 6.00 usec  
TE 300.7 K  
D1 1.00000000 sec  
TD0 1

CHANNEL f1  
NUC1 1H  
P1 7.15 usec  
PL1 4.00 dB  
SFO1 300.1318534 MHz

F2 - Processing parameters  
SI 32768  
SF 300.1299972 MHz  
WDW EM  
SSB 0  
LB 0.30 Hz  
GB 0  
PC 1.40

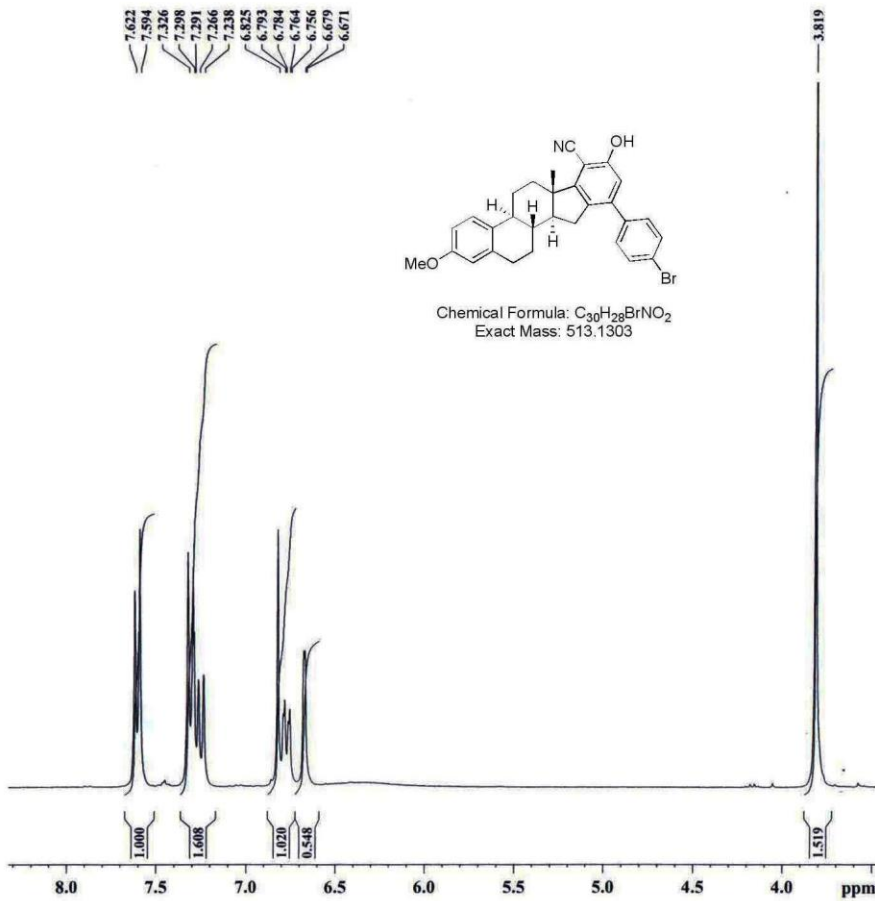

CIMAP PROTON  
PROJECT NO.: mlp-02

Current Data Parameters  
NAME atghmk218d.p  
EXPNO 1  
PROCNO 1

F2 - Acquisition Parameters  
Date 20140603  
Time 11.38  
INSTRUM spect  
PROBHD 5 mm Multinucl  
PULPROG zg30  
TD 65536  
SOLVENT CDCl3  
NS 16  
DS 2  
SWH 8992.806 Hz  
FIDRES 0.137219 Hz  
AQ 3.6438515 sec  
RG 203.2  
DW 55.600 usec  
DE 6.00 usec  
TE 300.7 K  
D1 1.00000000 sec  
TD0 1

CHANNEL f1  
NUC1 1H  
P1 7.15 usec  
PL1 4.00 dB  
SFO1 300.1318534 MHz

F2 - Processing parameters  
SI 32768  
SF 300.1299972 MHz  
WDW EM  
SSB 0  
LB 0.30 Hz  
GB 0  
PC 1.40

RSC Advances

CIMAP-CARBON  
PROJECT NO. : MLP-04

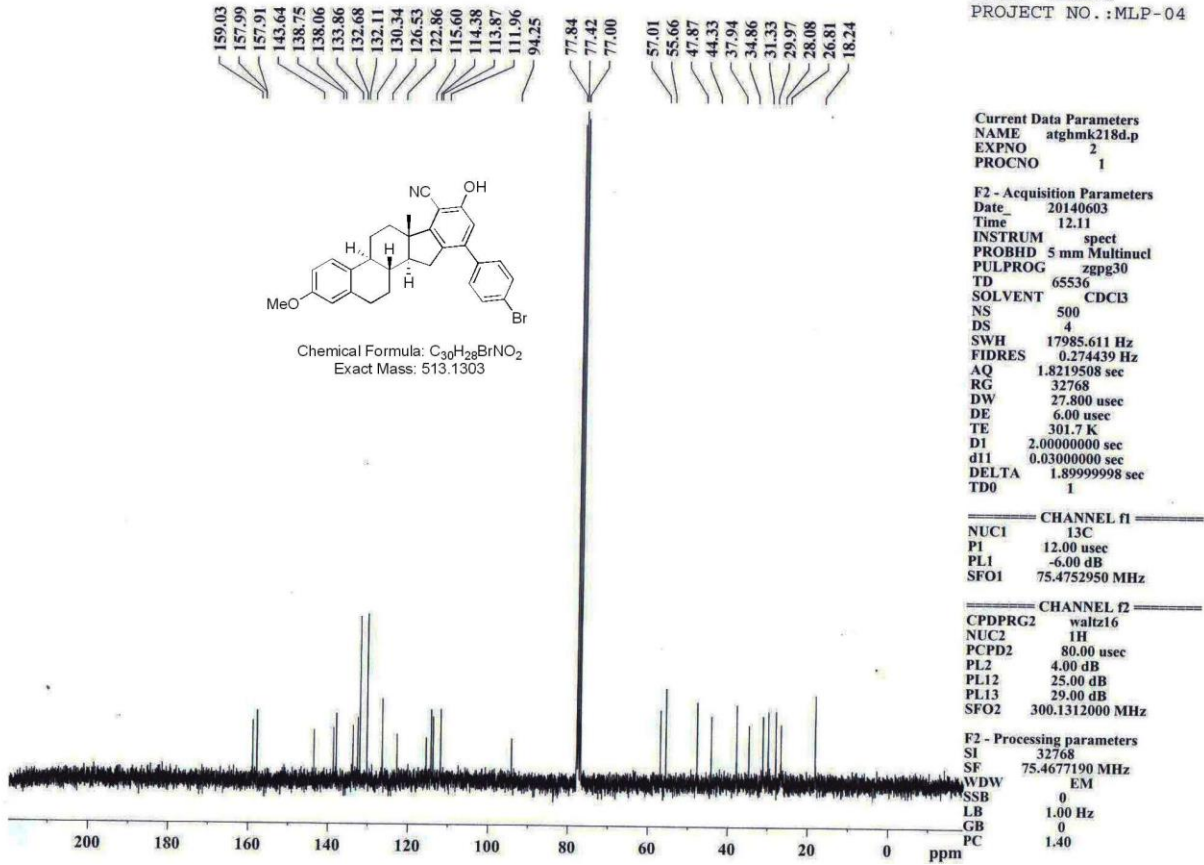

APT: X, XH2 positiv

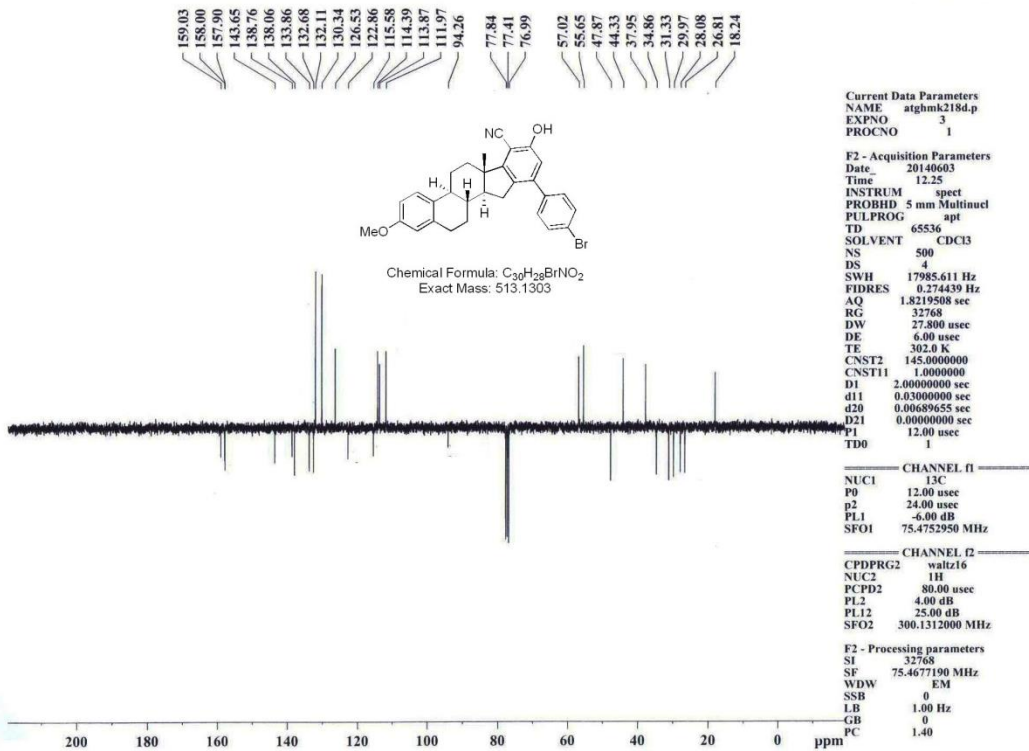

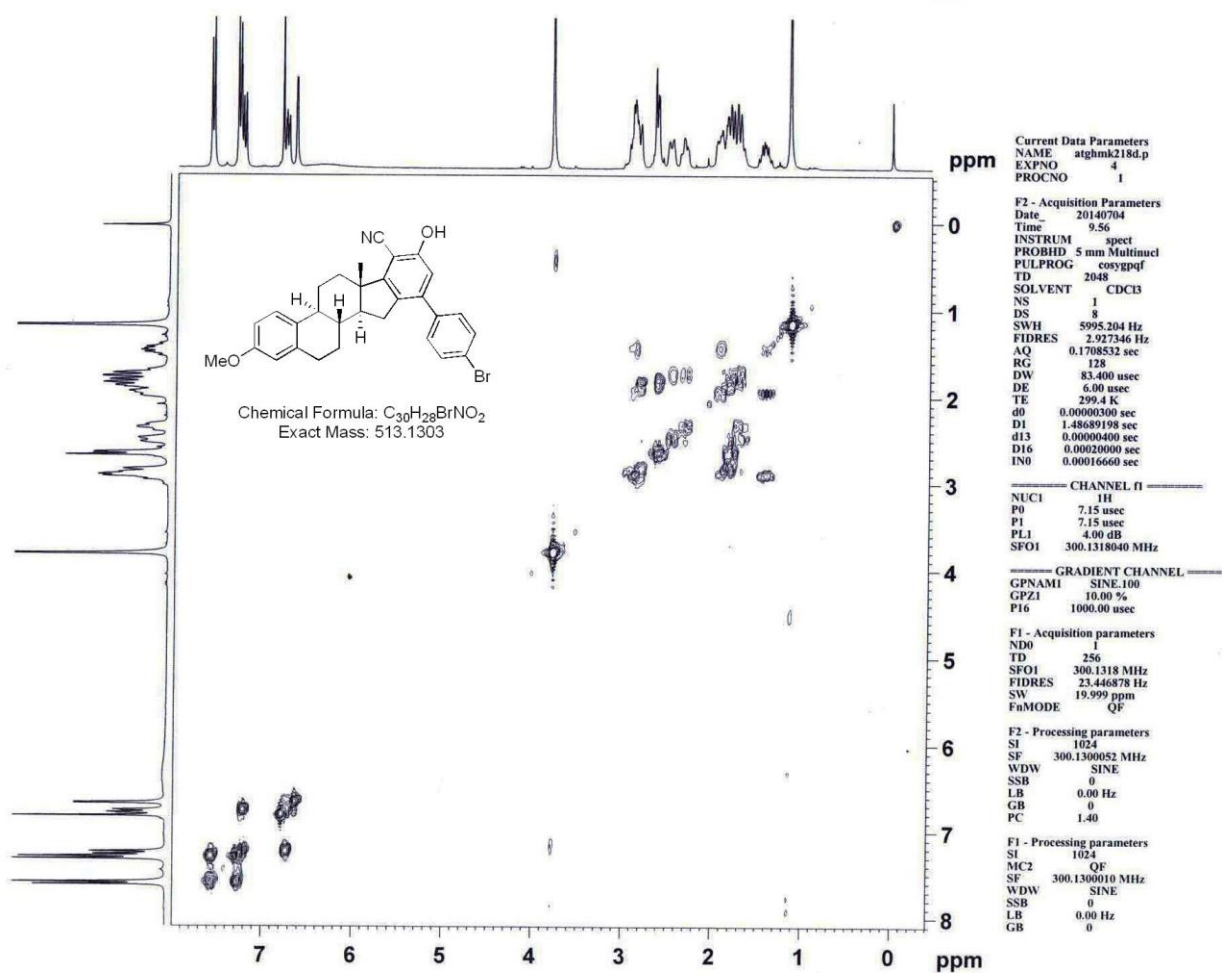

# RSC Advances

HSQC/GP

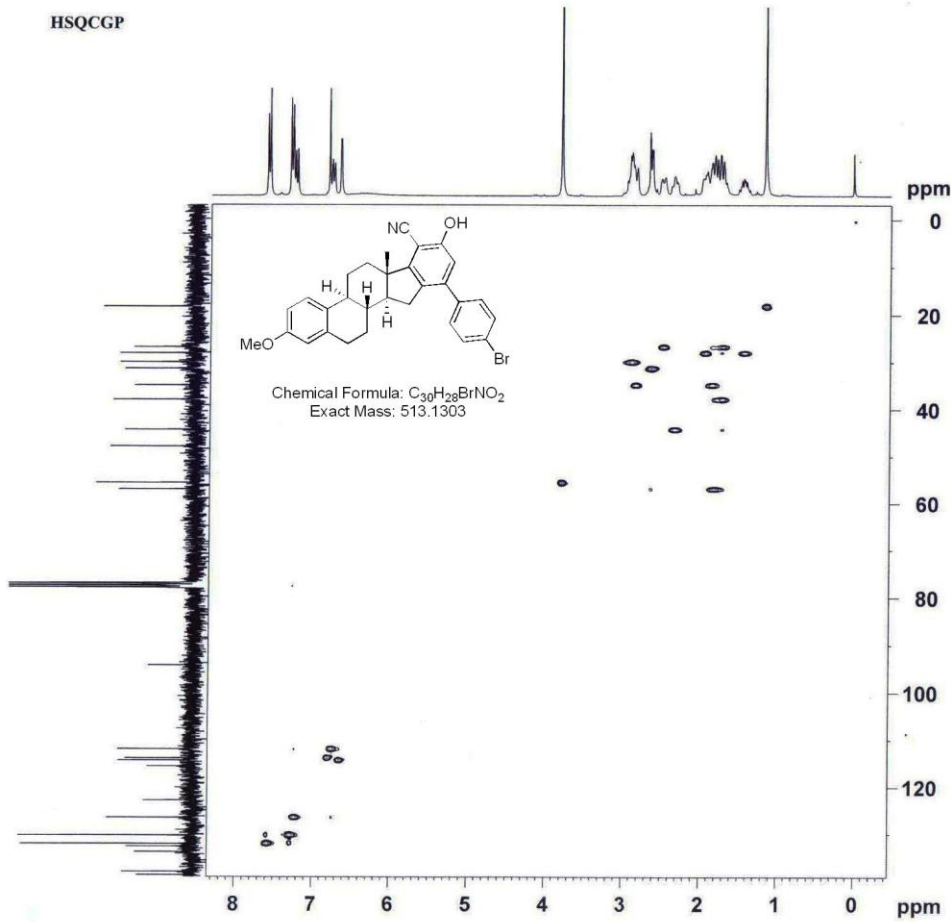

Current Data Parameters  
NAME stghmk218d.p  
EXPNO 5  
PROCNO 1

F2 - Acquisition Parameters  
Date\_ 20140704  
Time 10:04  
INSTRUM spect  
PROBHD 5 mm Multinuc  
PULPROG hzgpgprg2  
TD 1024  
SOLVENT DMSO  
NS 2  
DS 16  
SWH 5995.204 Hz  
FIDRES 5.854691 Hz  
AQ 0.0685416 sec  
RG 18390.4  
DW 83.480 usec  
DE 6.00 usec  
TE 299.6 K  
CNST2 145.000000  
d0 0.00000000 sec  
D1 1.50000000 sec  
d4 0.00172414 sec  
d11 0.03000000 sec  
d13 0.00000000 sec  
D16 0.00020000 sec  
D24 0.00006207 sec  
DELTA 0.00127030 sec  
DELTA1 0.00120809 sec  
DELTA2 0.00006397 sec  
DELTA3 0.00052414 sec  
IN0 0.00004000 sec  
STICNT 128  
ZGPGNS

CHANNEL f1  
NUC1 1H  
P1 7.15 usec  
P2 14.30 usec  
P28 1900.00 usec  
PL1 4.90 dB  
SFO1 300.131040 MHz

CHANNEL f2  
CPDPRG2 EPT  
NUC2 13C  
P3 12.00 usec  
P4 24.00 usec  
PCPD2 70.00 usec  
PL2 -6.00 dB  
PL12 9.32 dB  
SFO2 75.4734070 MHz

GRADIENT CHANNEL  
GPNAM1 SINE.100  
GPNAM2 SINE.100  
GPNAM3 SINE.100  
GPNAM4 SINE.100  
GPZ1 80.00 %  
GPZ2 20.10 %  
GPZ3 11.00 %  
GPZ4 5.00 %  
P16 1000.00 usec  
P19 600.00 usec

F1 - Acquisition parameters  
ND0 2  
TD 256  
SFO1 75.47341 MHz  
FIDRES 48.828125 Hz  
SW 165.621 ppm  
F2MODE Echo-Antiecho

F2 - Processing parameters  
SI 1024  
SF 300.1300000 MHz  
WDW QSI  
SSB 2  
LB 0.00 Hz  
GB 0  
PC 1.40

F1 - Processing parameters  
SI 1024  
MC2 echo-antiecho  
SF 75.4677150 MHz  
WDW QSI  
SSB 2  
LB 0.00 Hz  
GB 0

# RSC Advances

HMBC

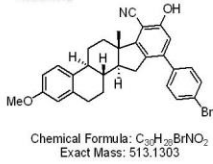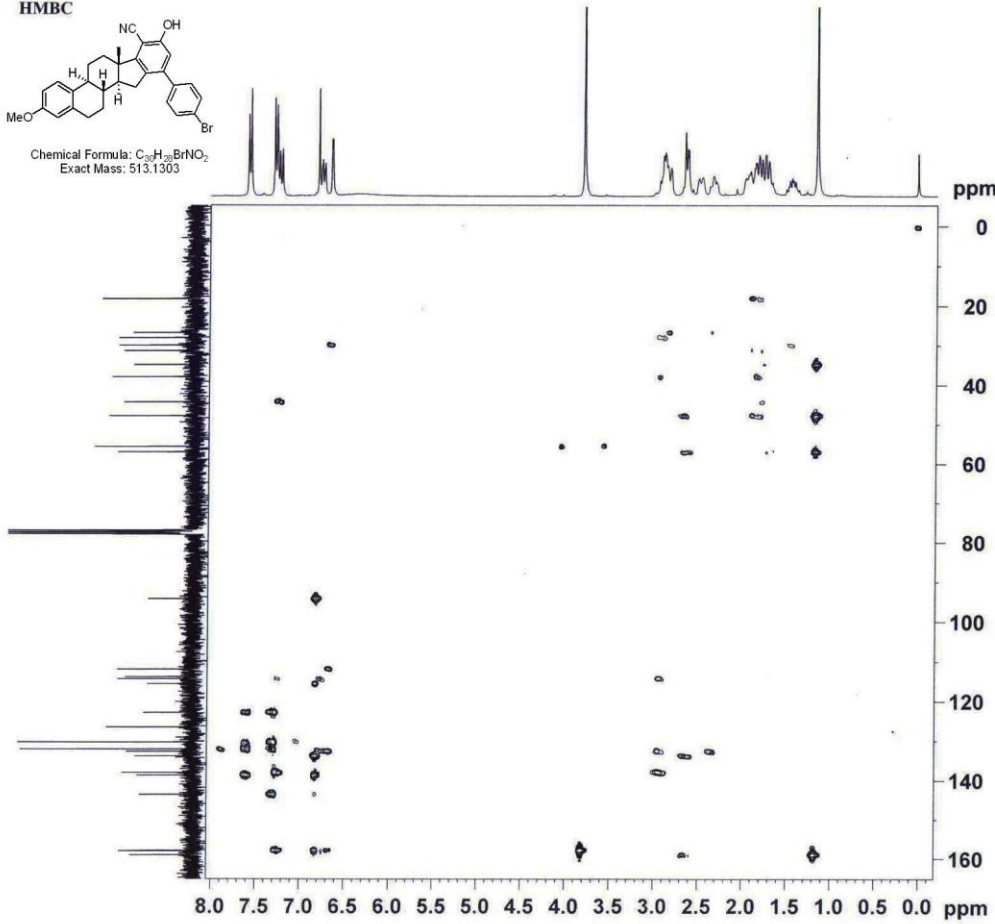

Current Data Parameters  
NAME aigmk118d.p  
EXPNO 6  
PROCNO 1

F2 - Acquisition Parameters  
Date\_ 20140704  
Time 10:19  
INSTRUM spect  
PROBHD 5 mm Multinuc  
PULPROG hmcpgp2dqf  
TD 4096  
SOLVENT CDCl3  
NS 8  
DS 16  
SWH 8995.204 Hz  
FIDRES 1.463673 Hz  
AQ 0.341564 sec  
RG 16384  
DW 83.400 usec  
DE 6.00 usec  
TE 300.4 K  
CNST6 135.0000000  
CNST7 165.0000000  
CNST13 7.0000000  
d0 0.00000300 sec  
D1 1.50000000 sec  
d6 0.07142857 sec  
D16 0.00020000 sec  
DELTA1 0.00250370 sec  
DELTA2 0.00183030 sec  
DELTA3 0.07022458 sec  
IN0 0.00002980 sec

CHANNEL f1  
NUC1 1H  
P1 7.15 usec  
P2 14.30 usec  
PL1 4.00 dB  
SFO1 300.1318640 MHz

CHANNEL f2  
NUC2 13C  
P3 12.00 usec  
PL2 -6.00 dB  
SFO2 75.4752830 MHz

GRADIENT CHANNEL  
GPNAM1 SINE.100  
GPNAM2 SINE.100  
GPNAM3 SINE.100  
GPNAM4 SINE.100  
GPNAM5 SINE.100  
GPNAM6 SINE.100  
GPZ1 50.00 %  
GPZ2 30.00 %  
GPZ3 40.10 %  
GPZ4 15.00 %  
GPZ5 -10.00 %  
GPZ6 -5.00 %  
P16 1000.00 usec

F1 - Acquisition parameters  
ND0 2  
TD 256  
SFO1 75.47528 MHz  
FIDRES 65.541107 Hz  
SW 222.305 ppm  
F0MODE QF

F2 - Processing parameters  
SI 1024  
SF 300.1299920 MHz  
WDW SINE  
SSB 0  
LB 0.00 Hz  
GB 0  
PC 1.40

F1 - Processing parameters  
SI 1024  
MC2 QF  
SF 75.4677190 MHz  
WDW SINE  
SSB 0  
LB 0.00 Hz  
GB 0

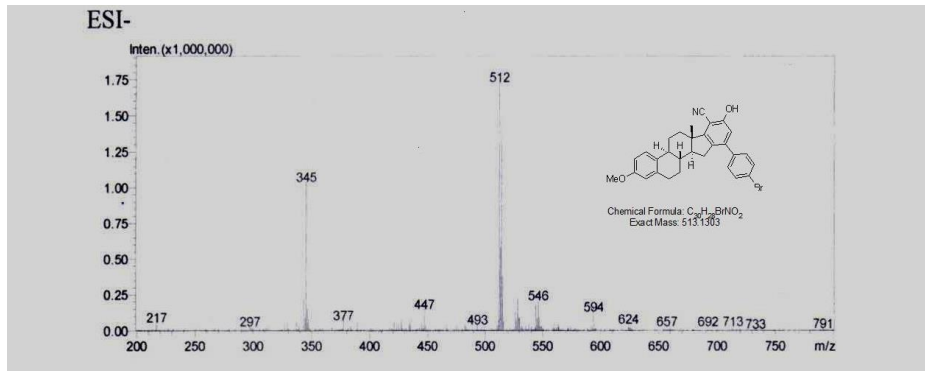

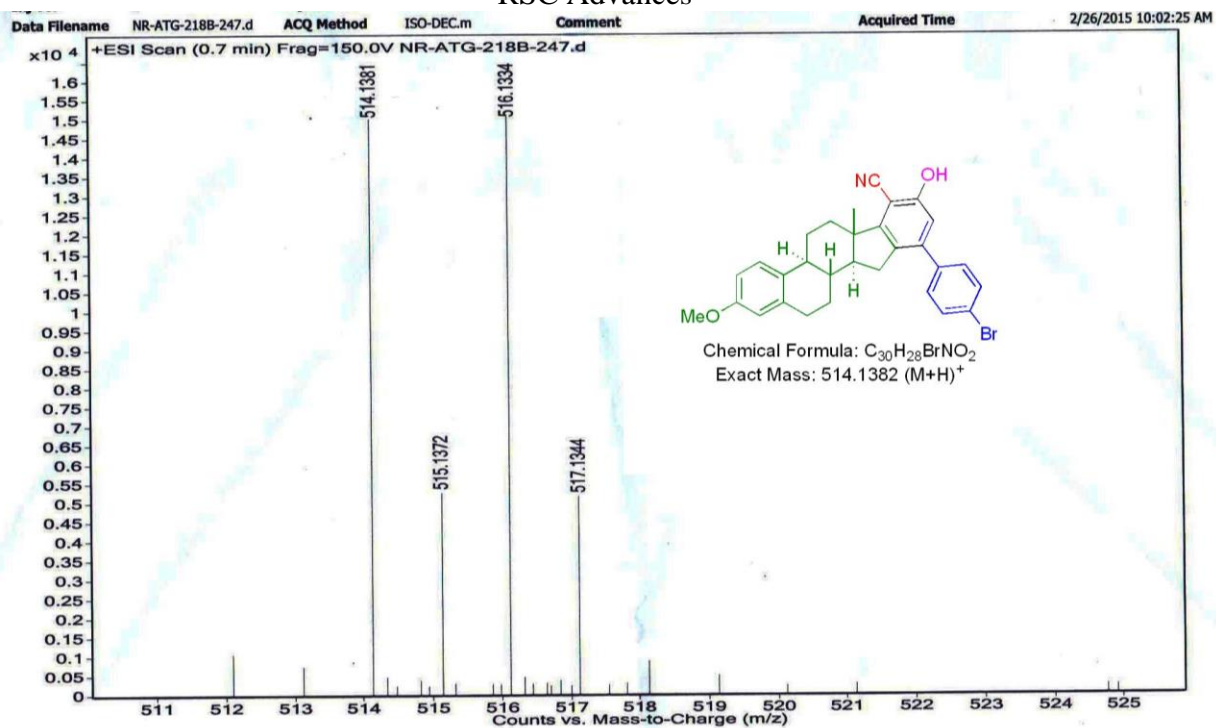

(+)(6*b*S,8*a*S,13*a*S,13*b*S)-4-methoxy-8*a*-methyl-10-morpholino-12-*p*-tolyl-2,6*b*,7,8,8*a*,13,13*a*,13*b*-octahydro-1*H*-indeno[2,1-*a*]phenanthrene-9-carbonitrile (**7b**)

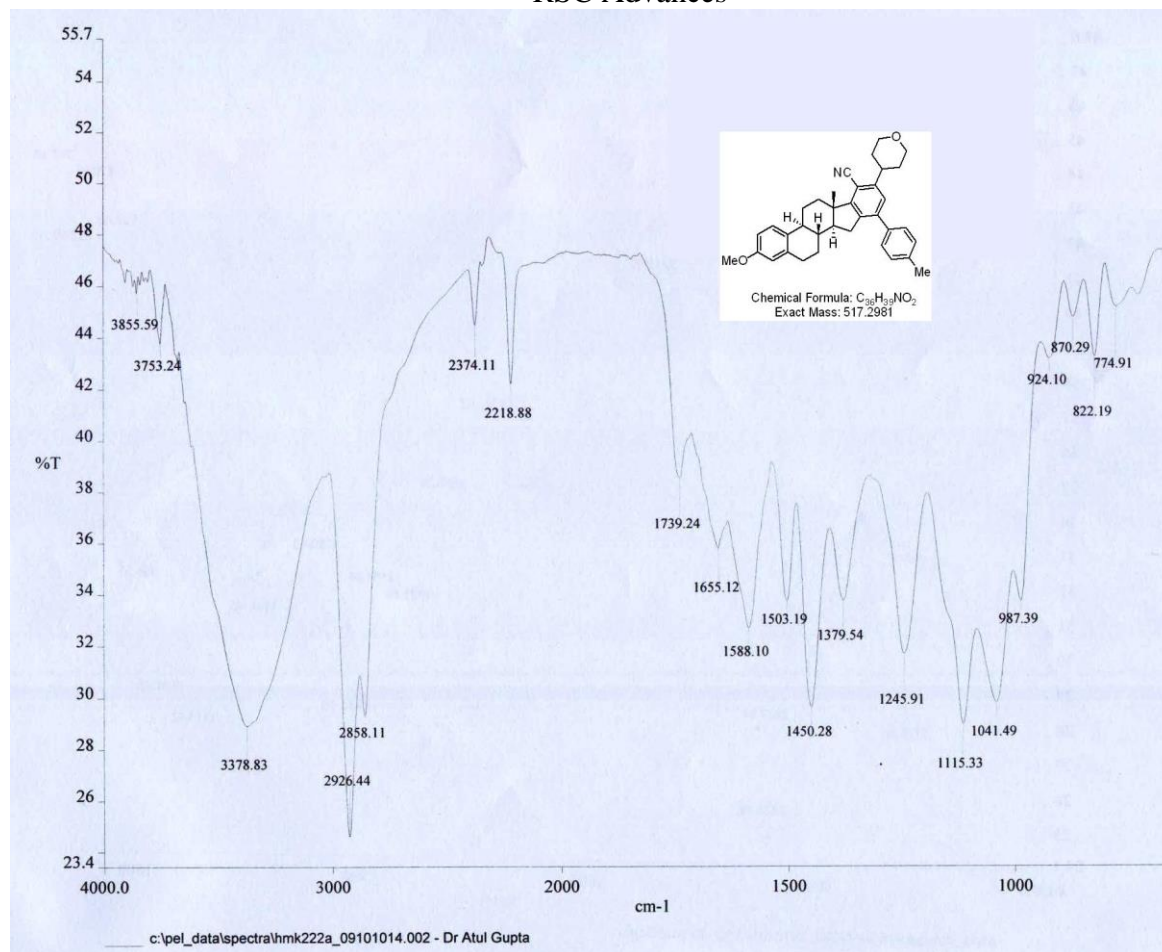

# RSC Advances

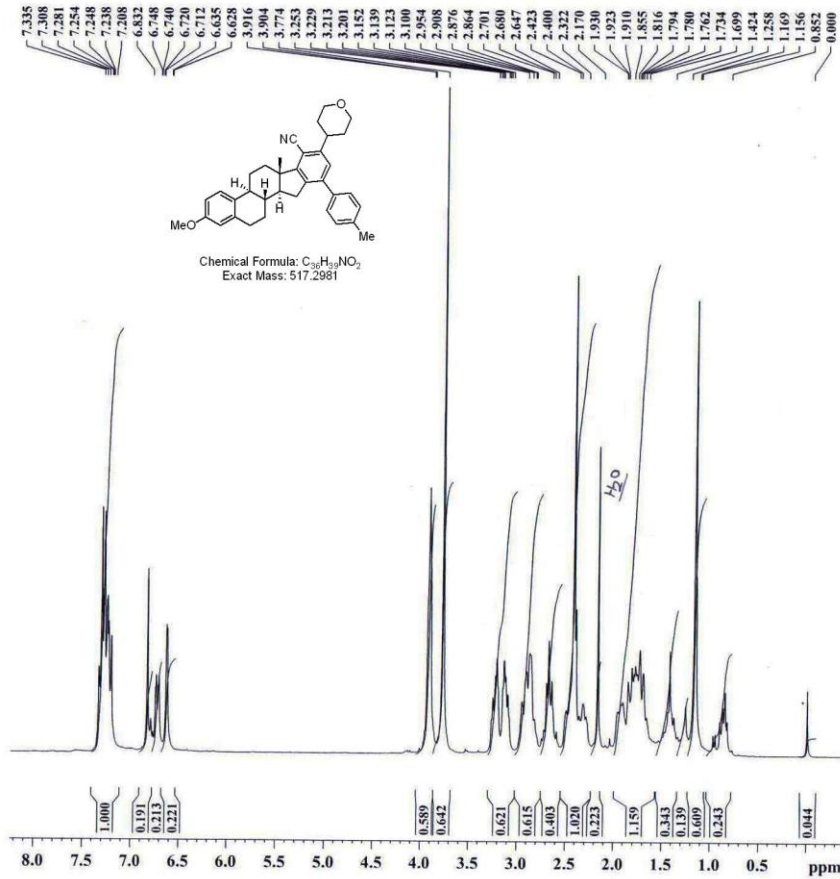

CIMAP PROTON  
PROJECT NO.: mlp-02

Current Data Parameters  
NAME atghmk222a.p  
EXPNO 1  
PROCNO 1

F2 - Acquisition Parameters  
Date\_ 20140702  
Time 10.16  
INSTRUM spect  
PROBHD 5 mm Multinuc1  
PULPROG zg30  
TD 65536  
SOLVENT CDCl3  
NS 30  
DS 2  
SWH 8992.806 Hz  
FIDRES 0.137219 Hz  
AQ 3.6438515 sec  
RG 128  
DW 55.600 usec  
DE 6.00 usec  
TE 300.0 K  
D1 1.00000000 sec  
TD0 1

CHANNEL f1  
NUC1 1H  
P1 7.15 usec  
PL1 4.00 dB  
SFO1 300.1318534 MHz

F2 - Processing parameters  
SI 32768  
SF 300.1300098 MHz  
WDW EM  
SSB 0  
LB 0.30 Hz  
GB 0  
PC 1.40



# RSC Advances

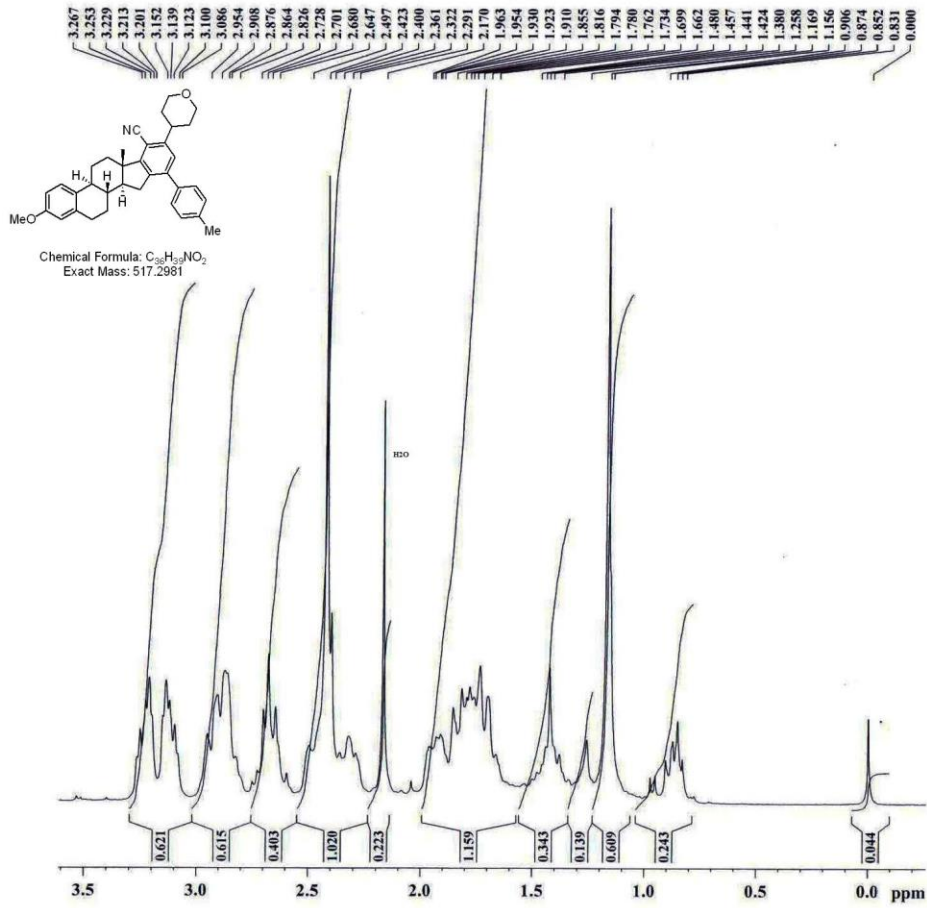

CIMAP PROTON  
PROJECT NO.: mlp-02

**Current Data Parameters**  
NAME atghmk222a.p  
EXPNO 1  
PROCNO 1

**F2 - Acquisition Parameters**  
Date 20140702  
Time 10.16  
INSTRUM spect  
PROBHD 5 mm Multinucl  
PULPROG zg30  
TD 65536  
SOLVENT CDCl3  
NS 30  
DS 2  
SWH 8992.806 Hz  
FIDRES 0.137219 Hz  
AQ 3.6438515 sec  
RG 128  
DW 55.600 usec  
DE 6.00 usec  
TE 300.0 K  
D1 1.00000000 sec  
TD0 1

==== CHANNEL f1 =====  
NUC1 1H  
P1 7.15 usec  
PL1 4.00 dB  
SFO1 300.1318534 MHz

**F2 - Processing parameters**  
SI 32768  
SF 300.1300098 MHz  
WDW EM  
SSB 0  
LB 0.30 Hz  
GB 0  
PC 1.40

RSC Advances

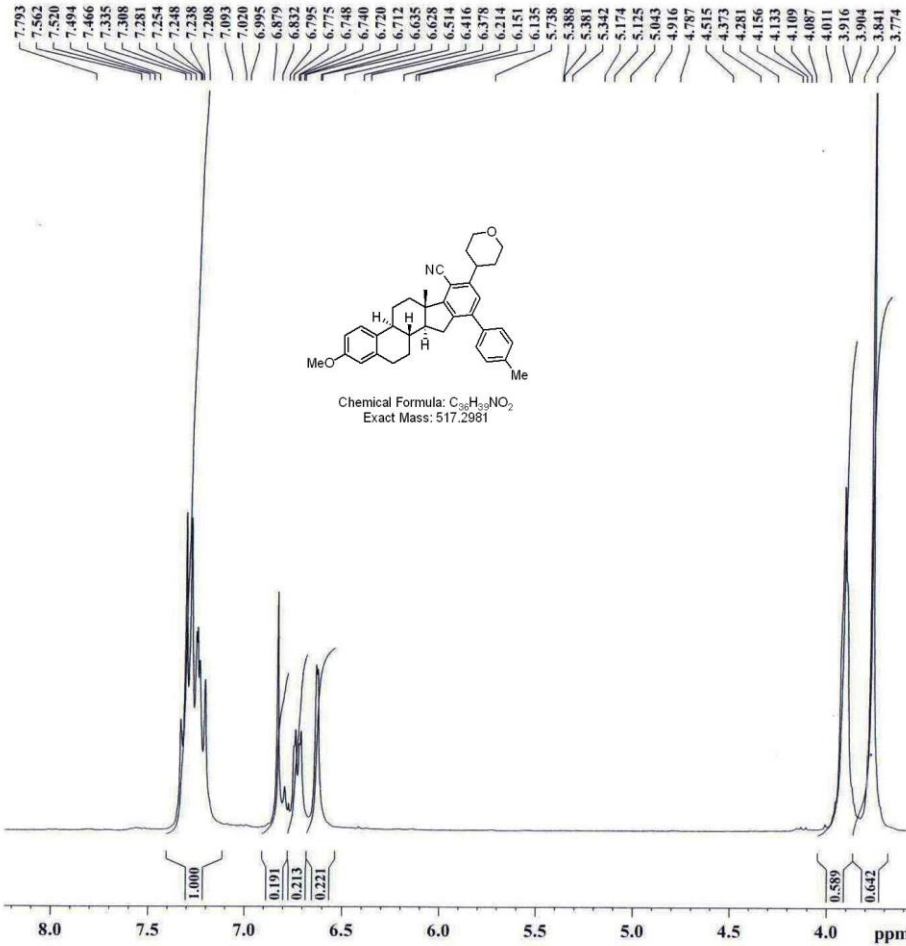

CIMAP PROTON  
PROJECT NO.: mlp-02

**Current Data Parameters**  
NAME atghmk222a.p  
EXPNO 1  
PROCNO 1

**F2 - Acquisition Parameters**  
Date\_ 20140702  
Time 10.16  
INSTRUM spect  
PROBHD 5 mm Multinucl  
PULPROG zg30  
TD 65536  
SOLVENT CDCl3  
NS 30  
DS 2  
SWH 8992.806 Hz  
FIDRES 0.137219 Hz  
AQ 3.6438515 sec  
RG 128  
DW 55.600 usec  
DE 6.00 usec  
TE 300.0 K  
D1 1.0000000 sec  
TD0 1

==== CHANNEL f1 =====  
NUC1 1H  
P1 7.15 usec  
PL1 4.00 dB  
SFO1 300.1318534 MHz

**F2 - Processing parameters**  
SI 32768  
SF 300.1300098 MHz  
WDW EM  
SSB 0  
LB 0.30 Hz  
GB 0  
PC 1.40

# RSC Advances

CIMAP-CARBON  
PROJECT NO.: MLP-04

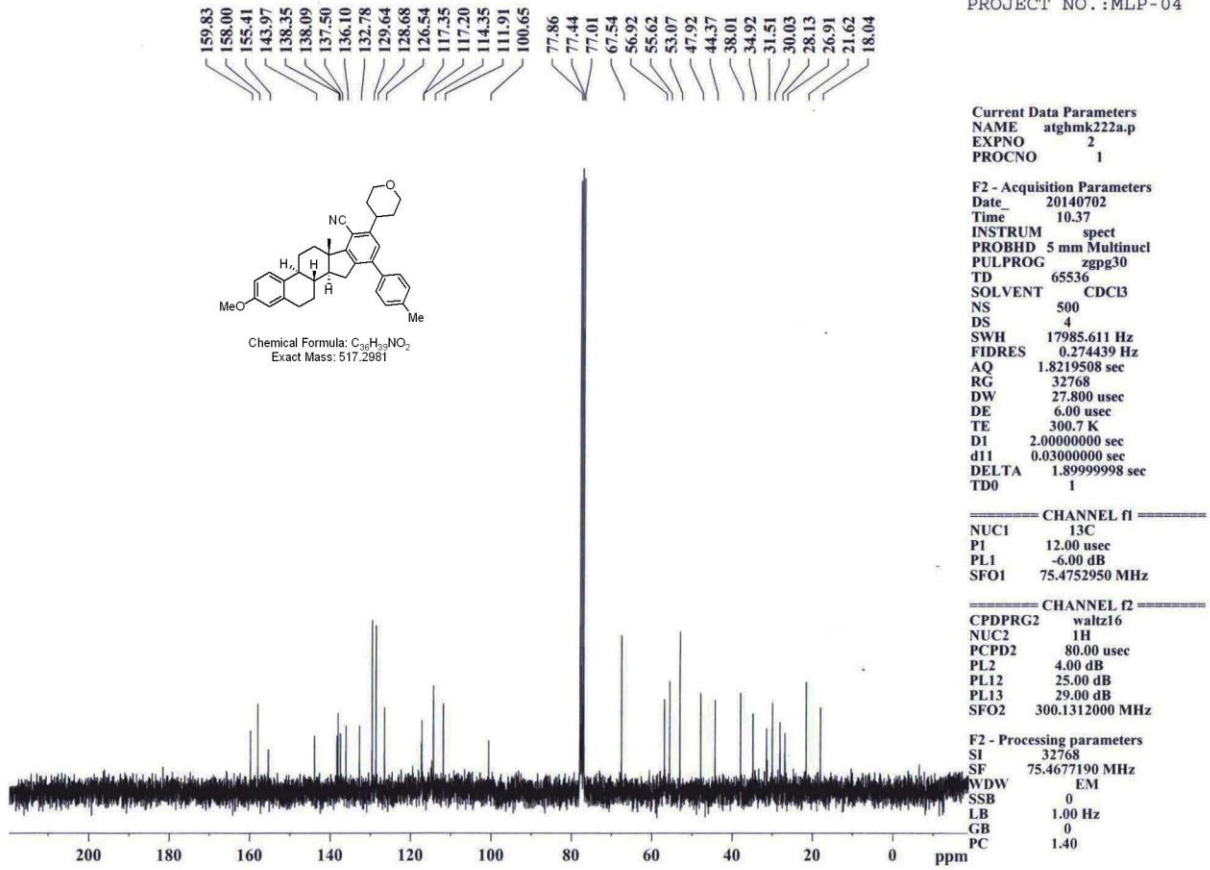

RSC Advances

APT: X, XH2 positi

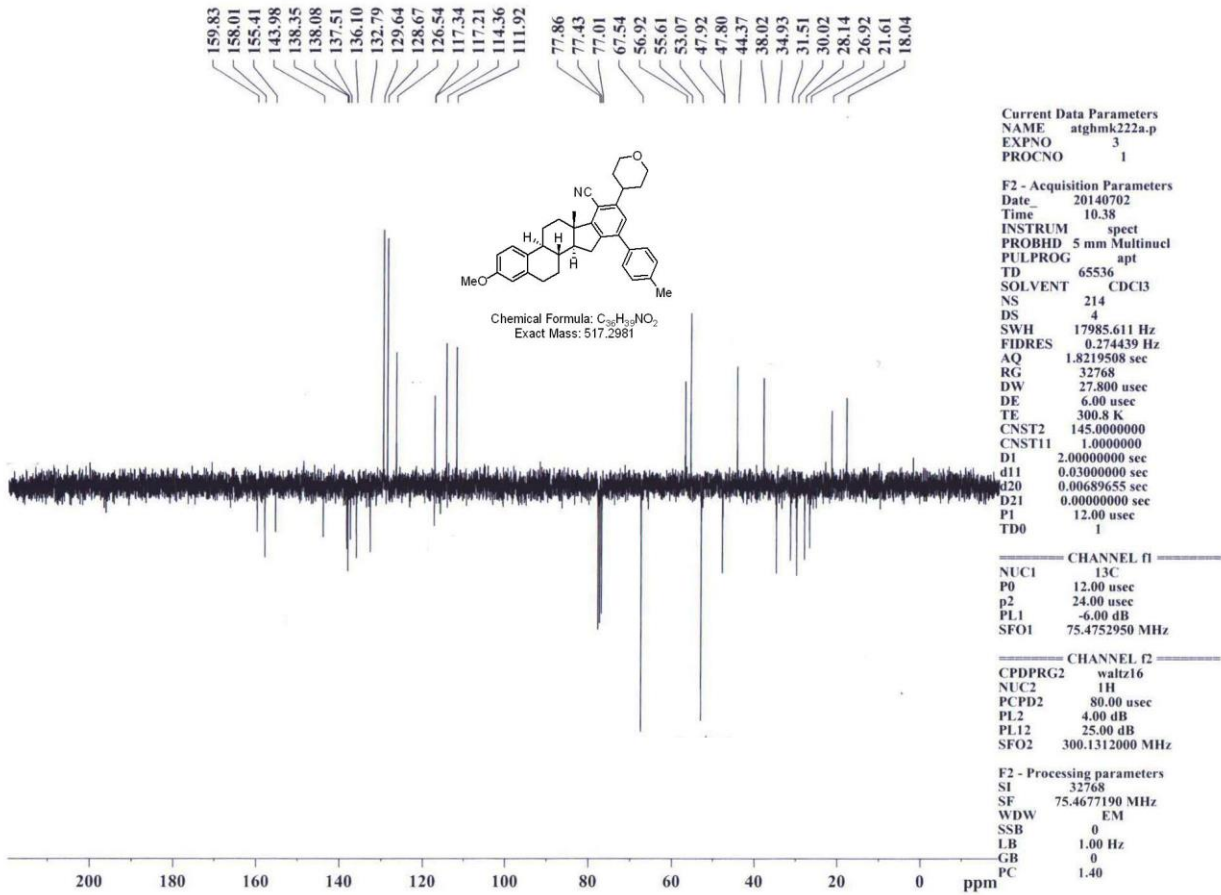

Sample ID: NR-ATG-222A  
Acquisition Date: 02/03/15 12:19:02

15I03FEB001 #24-56 RT: 0.30-0.69 AV: 33 SB: 2 0.01, 0.01 NL: 1.07E7  
T: + c ESI Full ms [ 100.00-750.00]

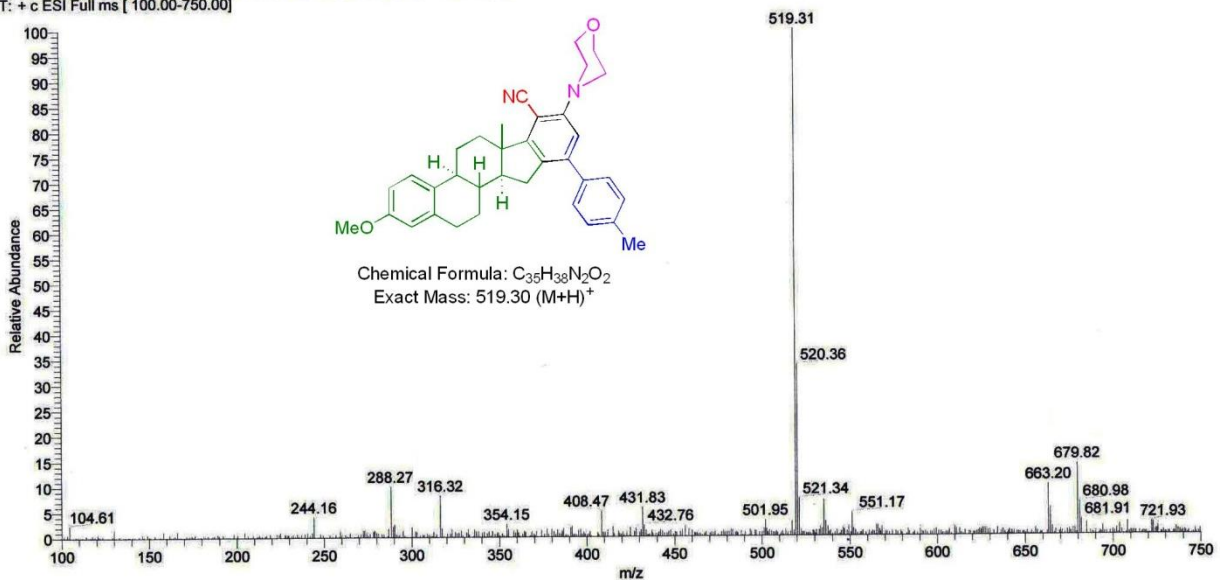

ION TRAP LCQ ADVANTAGE MAX  
THERMO ELECTRON CORPORATION

MCS-7B #4-19 RT: 0.02-0.13 AV: 16 NL: 6.48E6  
T: FTMS {1,1} + p ESI Full ms [150.00-2000.00]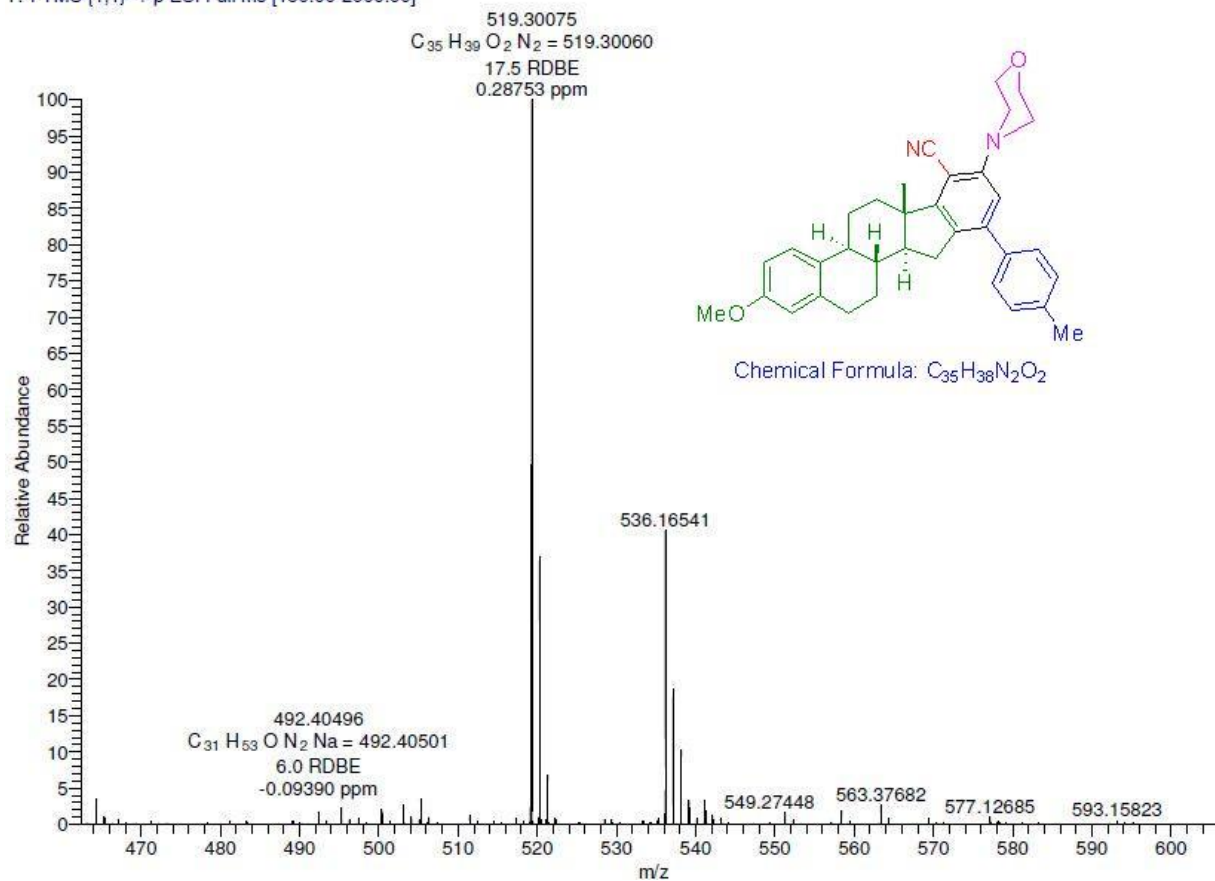

(+)(6*S*,8*aS*,13*aS*,13*bS*)-10-hydroxy-4-methoxy-8*a*-methyl-12-*p*-tolyl-2,6*b*,7,8,8*a*,13,13*a*,13*b*-octahydro-1*H*-indeno[2,1-*a*]phenanthrene-9-carbonitrile (8*b*)

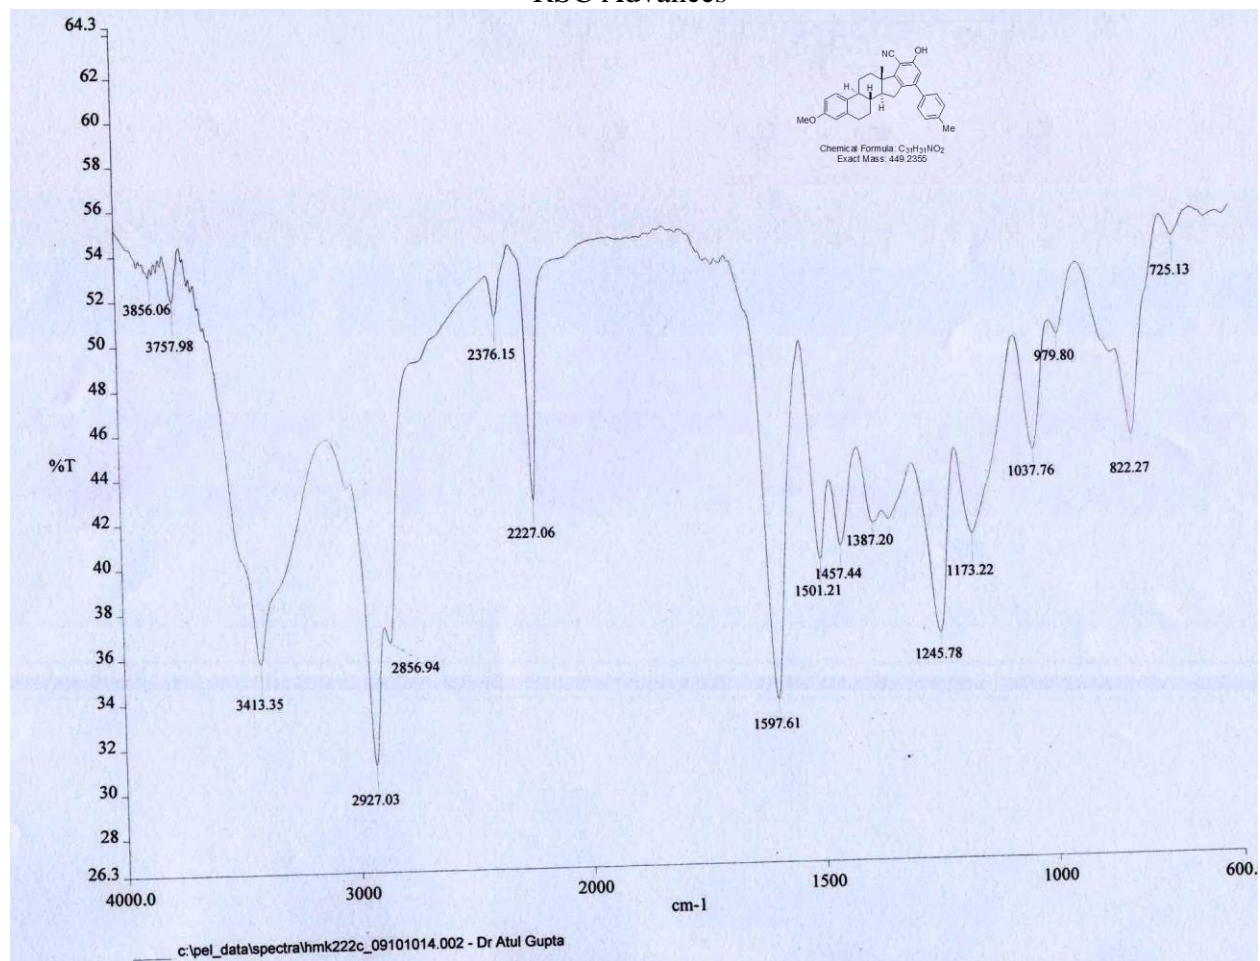

RSC Advances

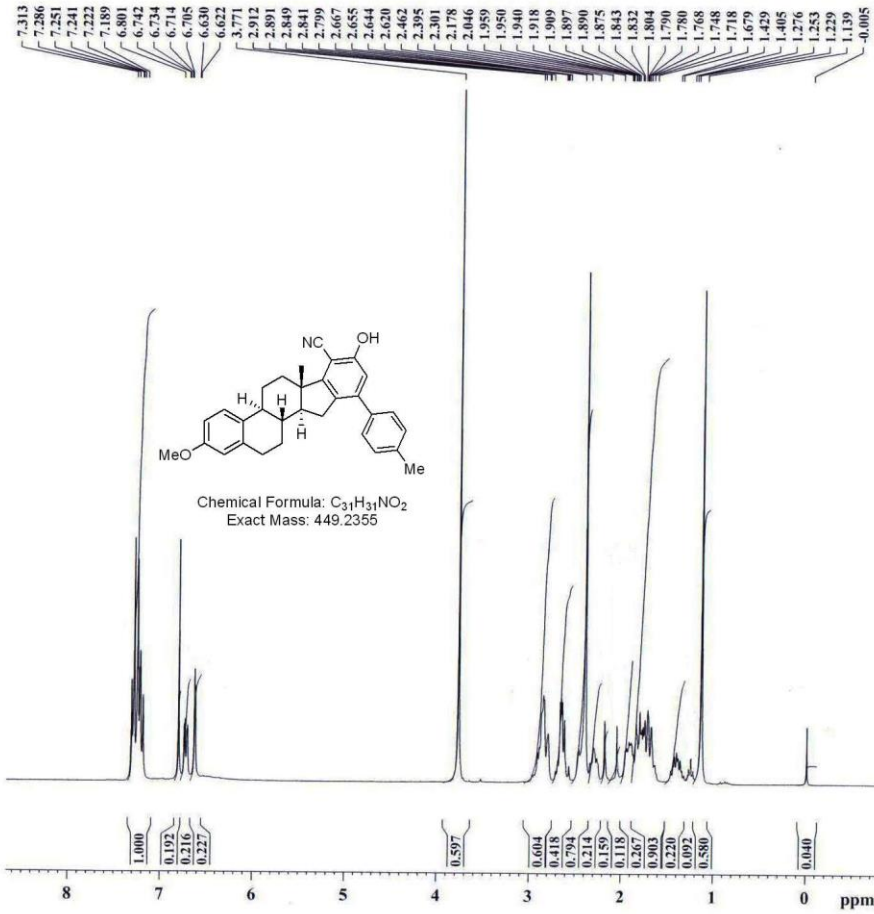

CIMAP PROTON  
PROJECT NO.: mlp-02

Current Data Parameters  
NAME atghmk222c.p  
EXPNO 1  
PROCNO 1

F2 - Acquisition Parameters  
Date 20140630  
Time 15.00  
INSTRUM spect  
PROBHD 5 mm Multinucl  
PULPROG zg30  
TD 65536  
SOLVENT CDCl3  
NS 28  
DS 2  
SWH 8992.806 Hz  
FIDRES 0.137219 Hz  
AQ 3.6438515 sec  
RG 181  
DW 55.600 usec  
DE 6.00 usec  
TE 302.5 K  
D1 1.00000000 sec  
TD0 1

CHANNEL f1  
NUC1 1H  
P1 7.15 usec  
PL1 4.00 dB  
SFO1 300.1318534 MHz

F2 - Processing parameters  
SI 32768  
SF 300.1300117 MHz  
WDW EM  
SSB 0  
LB 0.30 Hz  
GB 0  
PC 1.40

# RSC Advances

CIMAP-CARBON  
PROJECT NO. :MLP-04

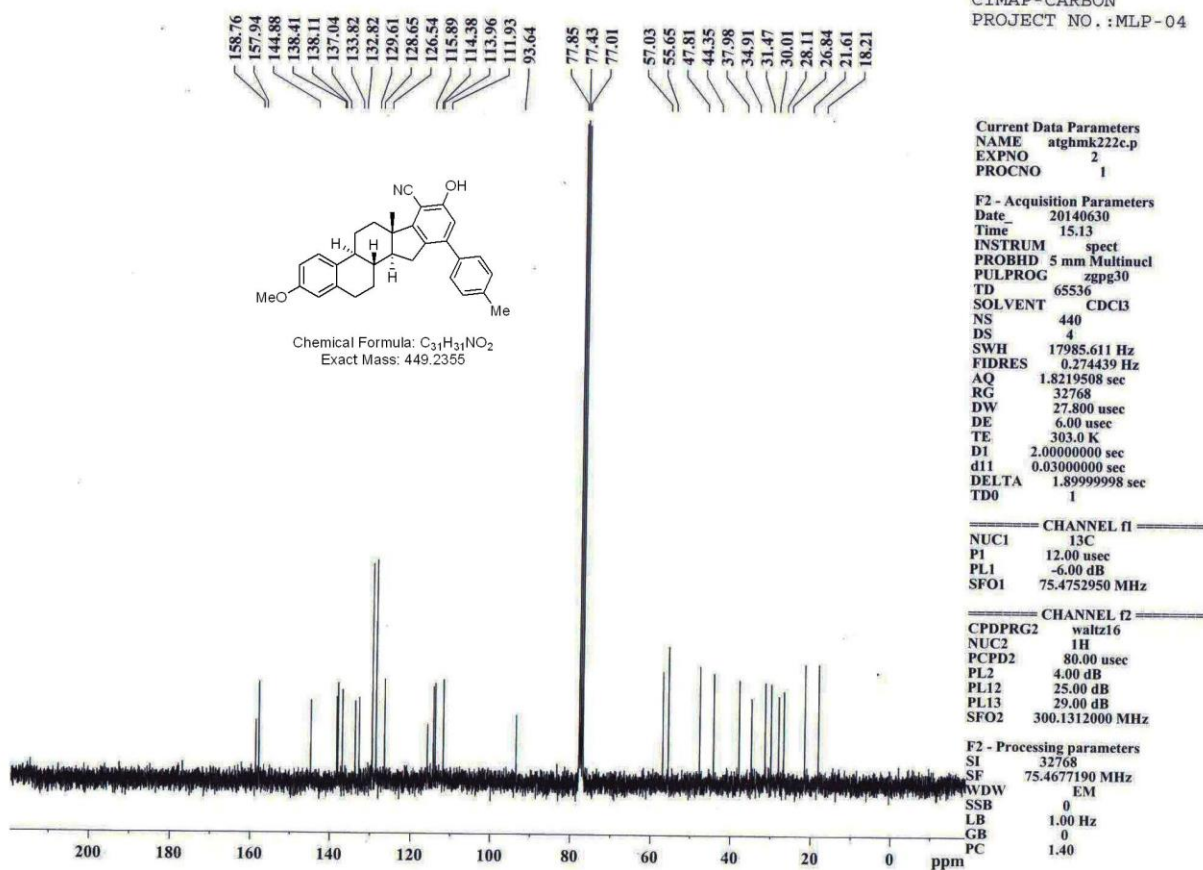



# RSC Advances

APT: X, XH2 positiv

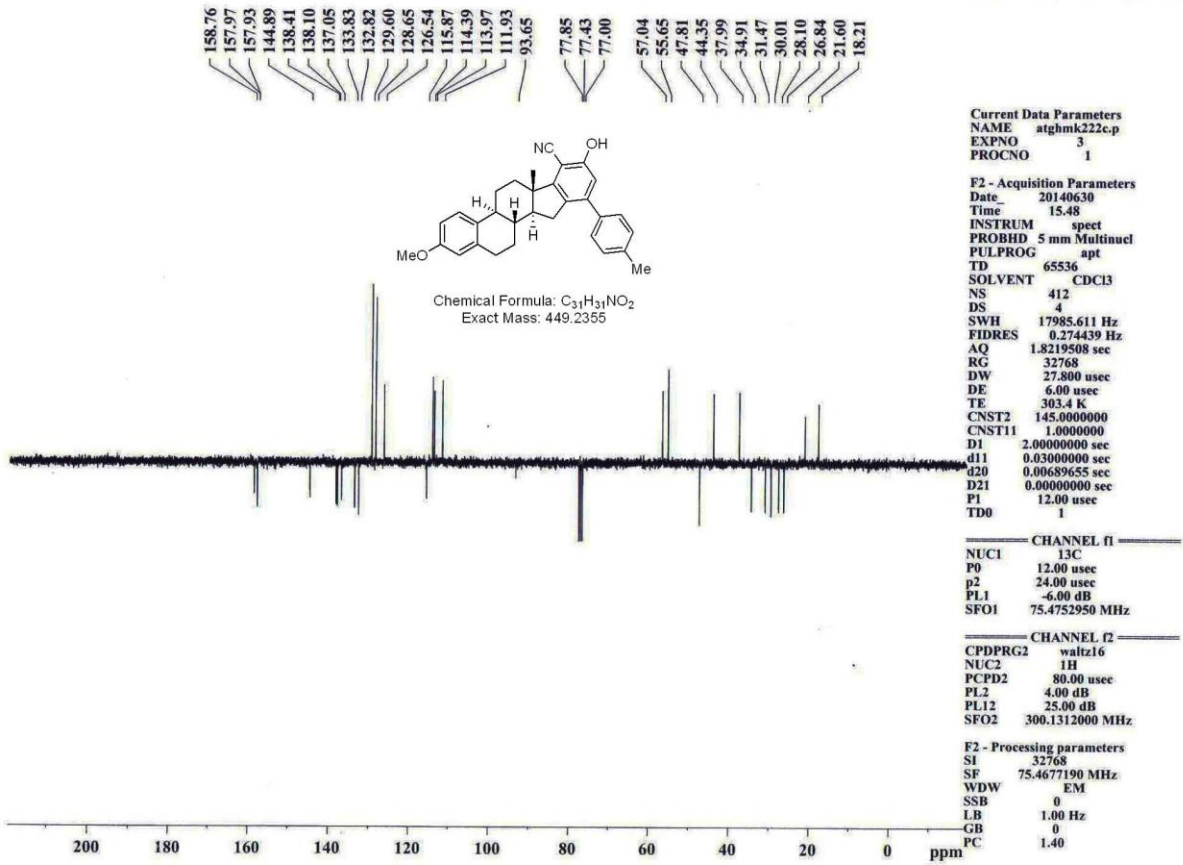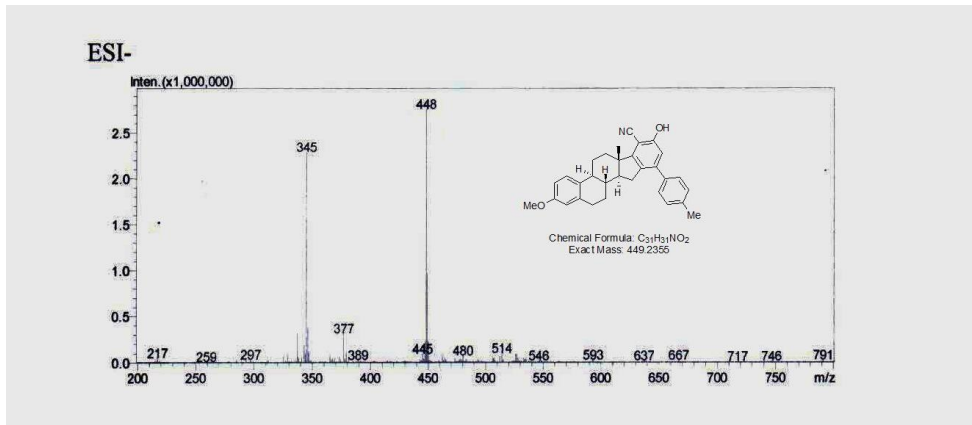

MCS-8B #4-19 RT: 0.02-0.13 AV: 16 NL: 3.98E4  
T: FTMS {1,1} + p ESI Full ms [150.00-2000.00]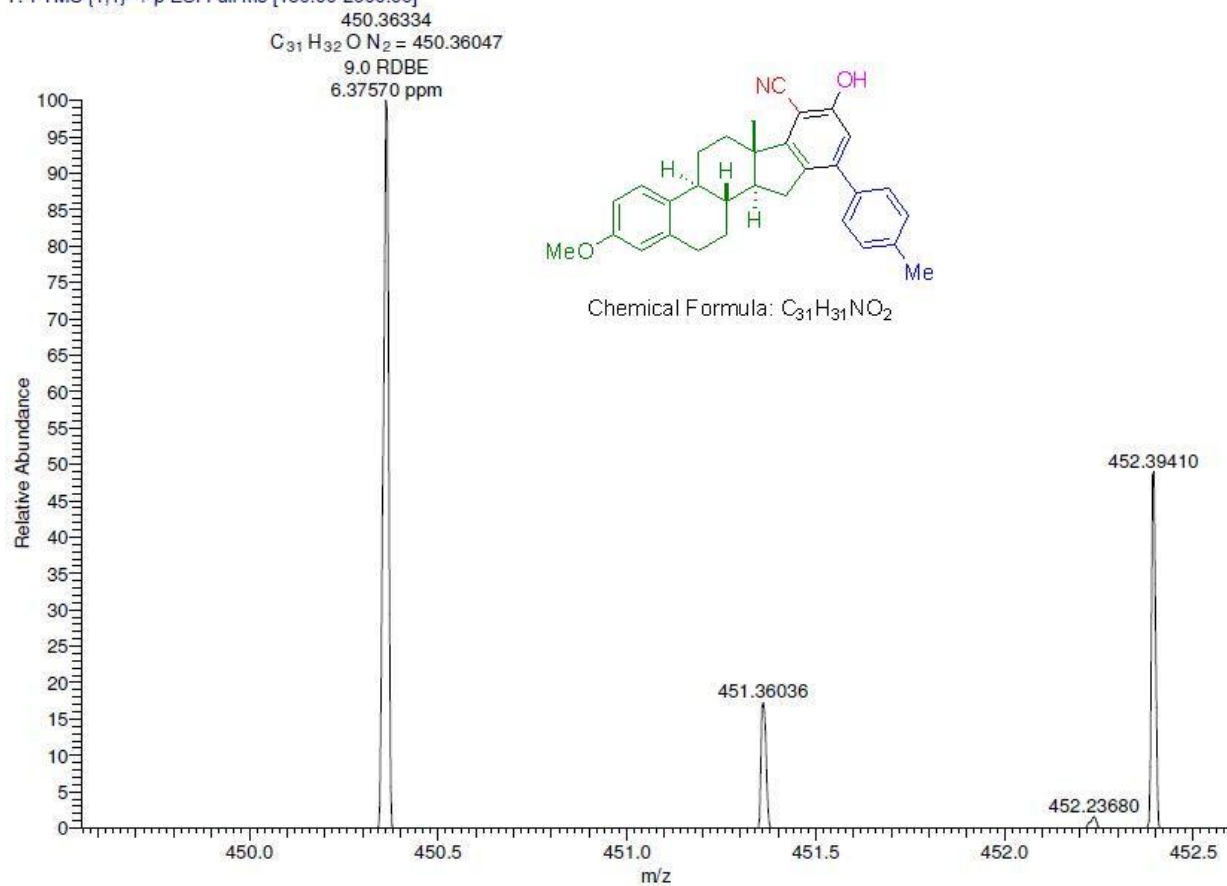

(+)(6*S*,8*aS*,13*aS*,13*bS*)-12-(4-chlorophenyl)-4-methoxy-8*a*-methyl-10-(piperidin-1-yl)-2,6*b*,7,8,8*a*,13,13*a*,13*b*-octahydro-1*H*-indeno[2,1-*a*]phenanthrene-9-carbonitrile (**7c**)

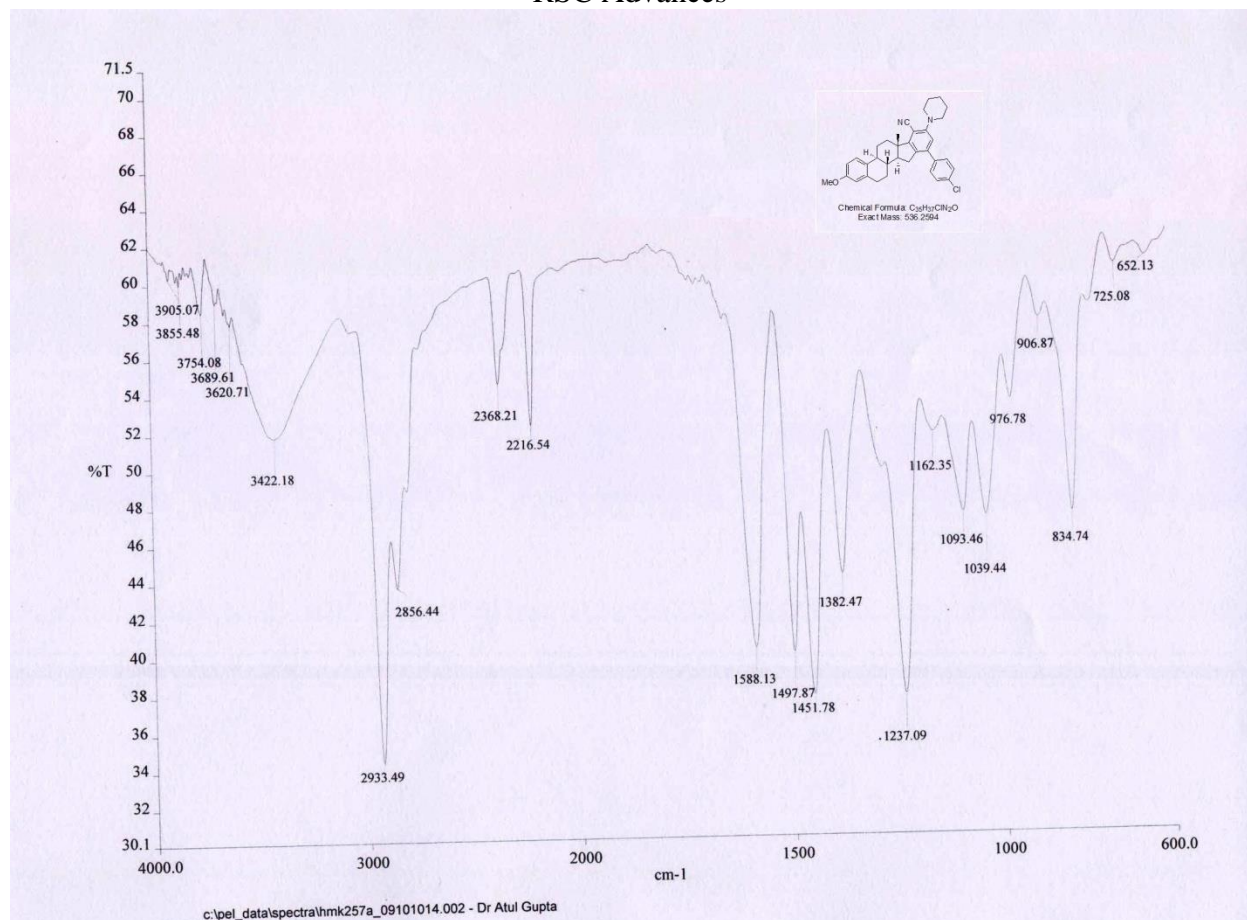

# RSC Advances

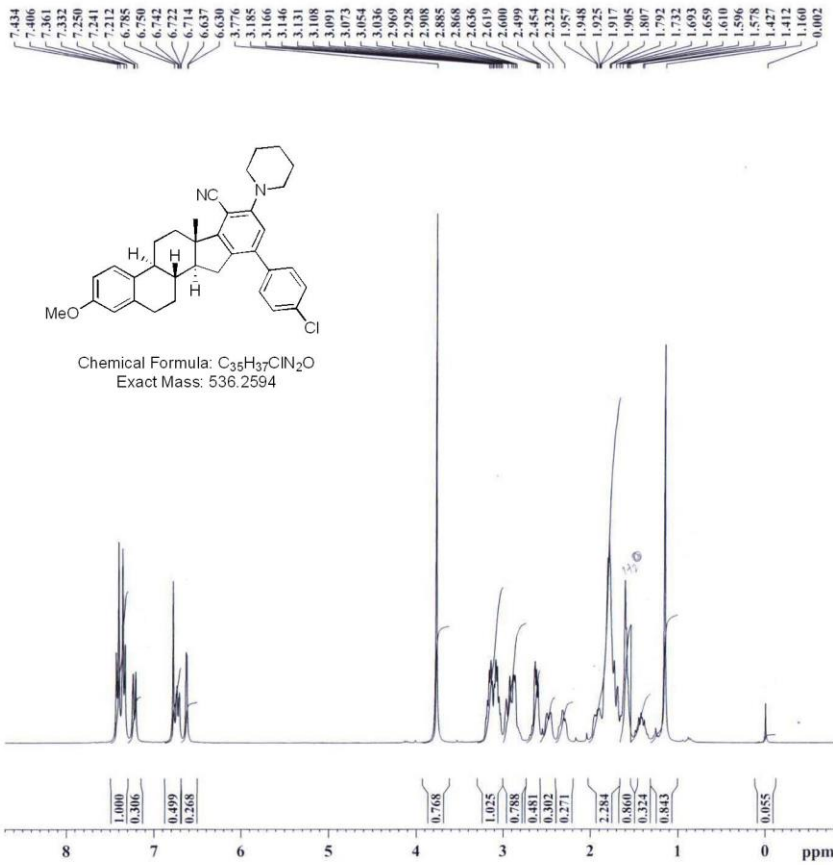

CIMAP PROTON  
PROJECT NO.: mlp-02

Current Data Parameters  
NAME atghmk257a.p  
EXPNO 1  
PROCNO 1

F2 - Acquisition Parameters  
Date\_ 20140721  
Time 12.25  
INSTRUM spect  
PROBHD 5 mm Multinucl  
PULPROG zg30  
TD 65536  
SOLVENT CDCl3  
NS 28  
DS 2  
SWH 8992.806 Hz  
FIDRES 0.137219 Hz  
AQ 3.6438515 sec  
RG 128  
DW 55.600 usec  
DE 6.00 usec  
TE 299.6 K  
D1 1.00000000 sec  
TD0 1

===== CHANNEL f1 =====  
NUC1 1H  
P1 7.15 usec  
PL1 4.00 dB  
SFO1 300.1318534 MHz

F2 - Processing parameters  
SI 32768  
SF 300.1300091 MHz  
WDW EM  
SSB 0  
LB 0.30 Hz  
GB 0  
PC 1.40

# RSC Advances

CIMAP-CARBON  
PROJECT NO. :MLP-04

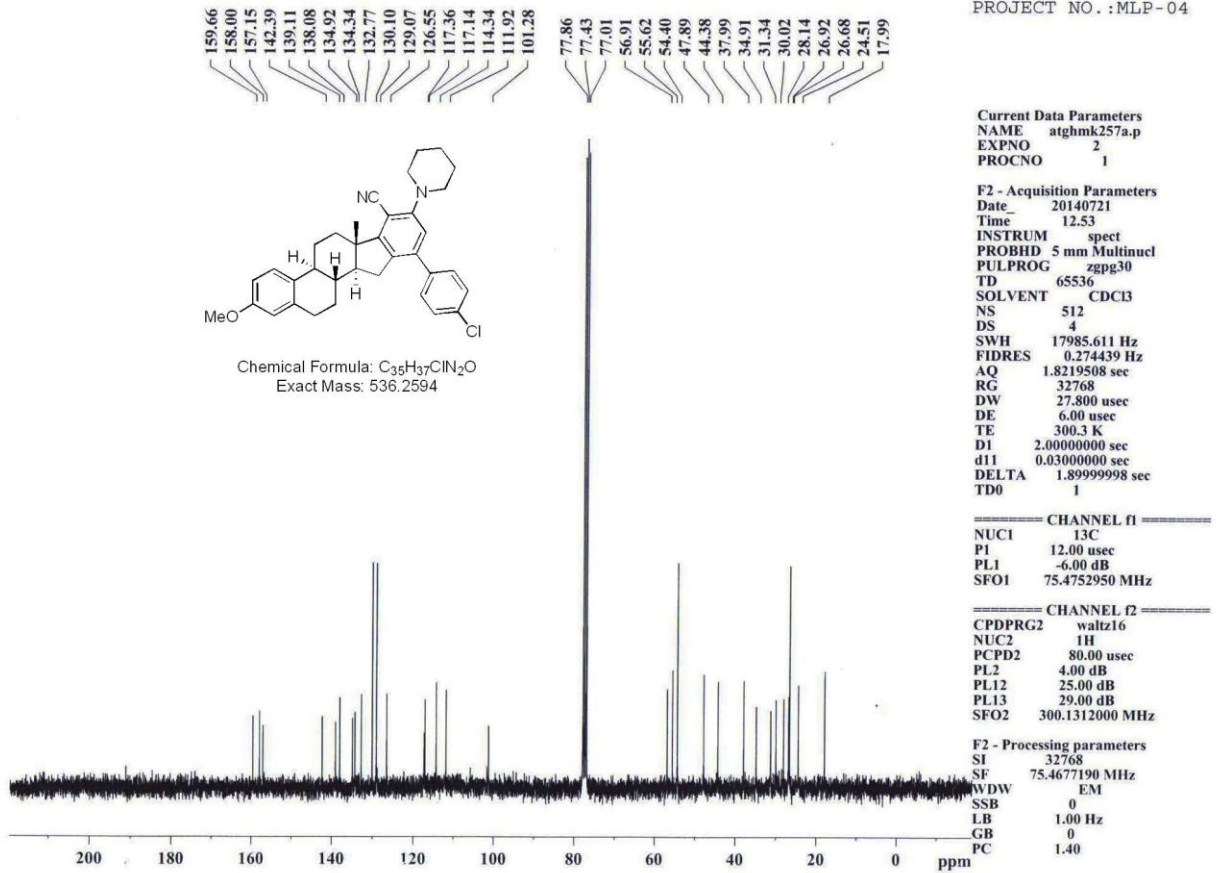

RSC Advances

APT: X, XH2 positiv

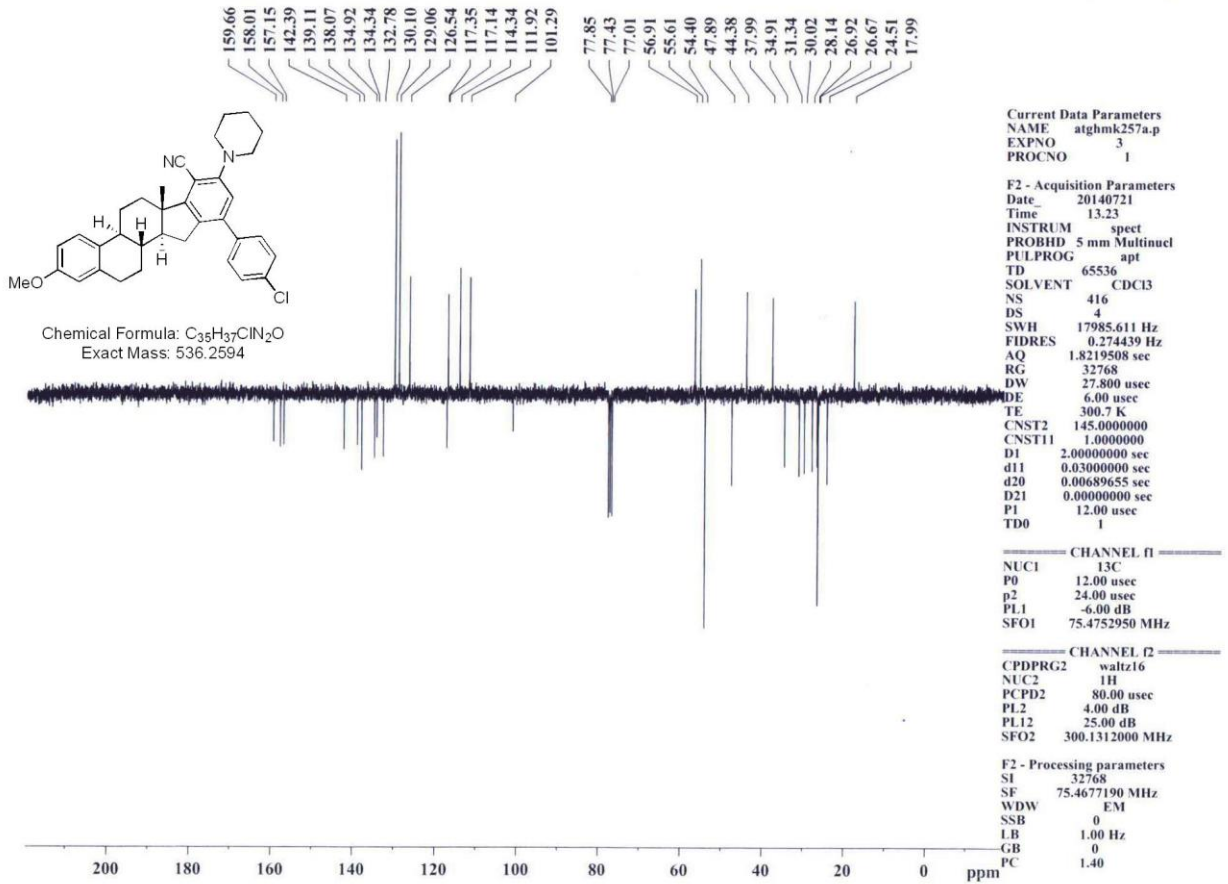

Sample ID: NR-ATG-257A  
Acquisition Date: 02/23/15 13:52:26

15I23FEB51 #15-35 RT: 0.31-0.70 AV: 21 SB: 2 0.01, 0.01 NL: 2.47E7  
T: + c ESI Full ms [ 150.00-1500.00]

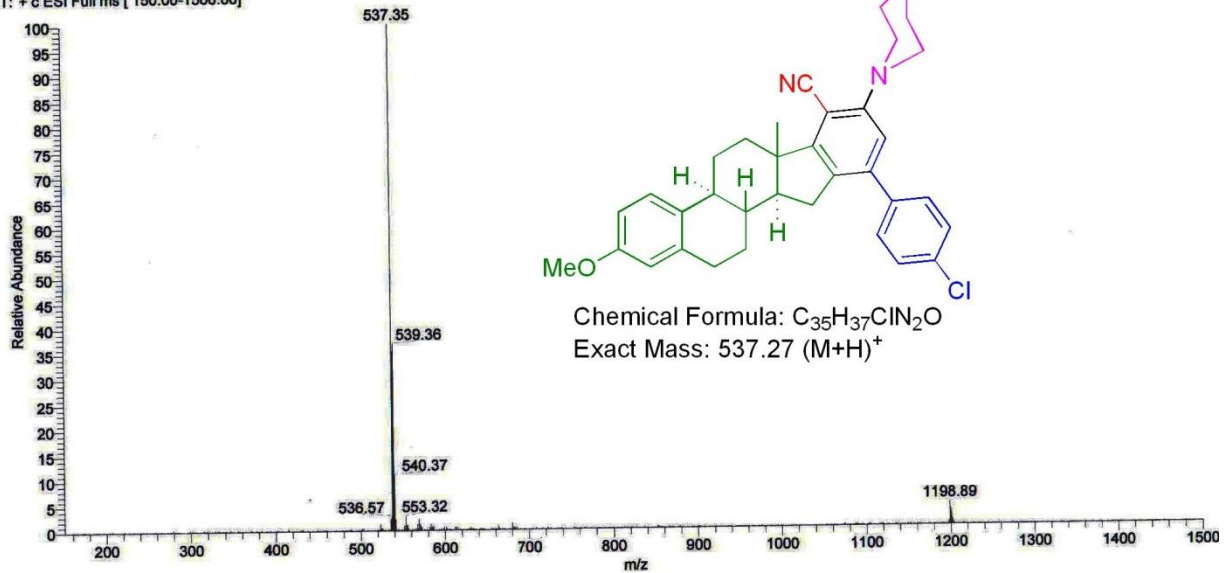

ION TRAP LCQ ADVANTAGE MAX  
THERMO ELECTRON CORPORATION

MCS-7C #4-19 RT: 0.02-0.13 AV: 16 NL: 3.45E6  
T: FTMS (1,1) + p ESI Full ms [150.00-2000.00]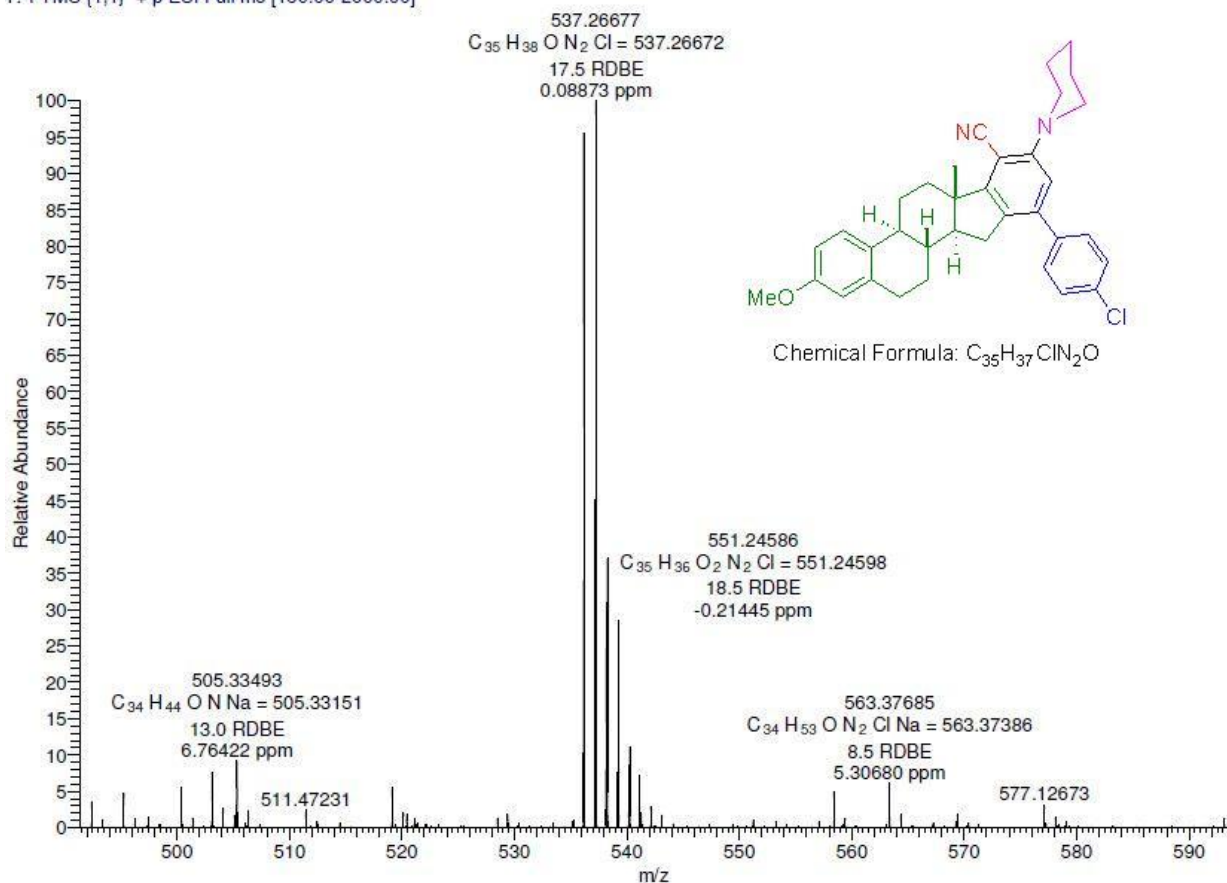

(+)(6*S*,8*aS*,13*aS*,13*bS*)-12-(4-chlorophenyl)-10-hydroxy-4-methoxy-8*a*-methyl-2,6*b*,7,8,8*a*,13,13*a*,13*b*-octahydro-1*H*-indeno[2,1-*a*]phenanthrene-9-carbonitrile (**8c**)

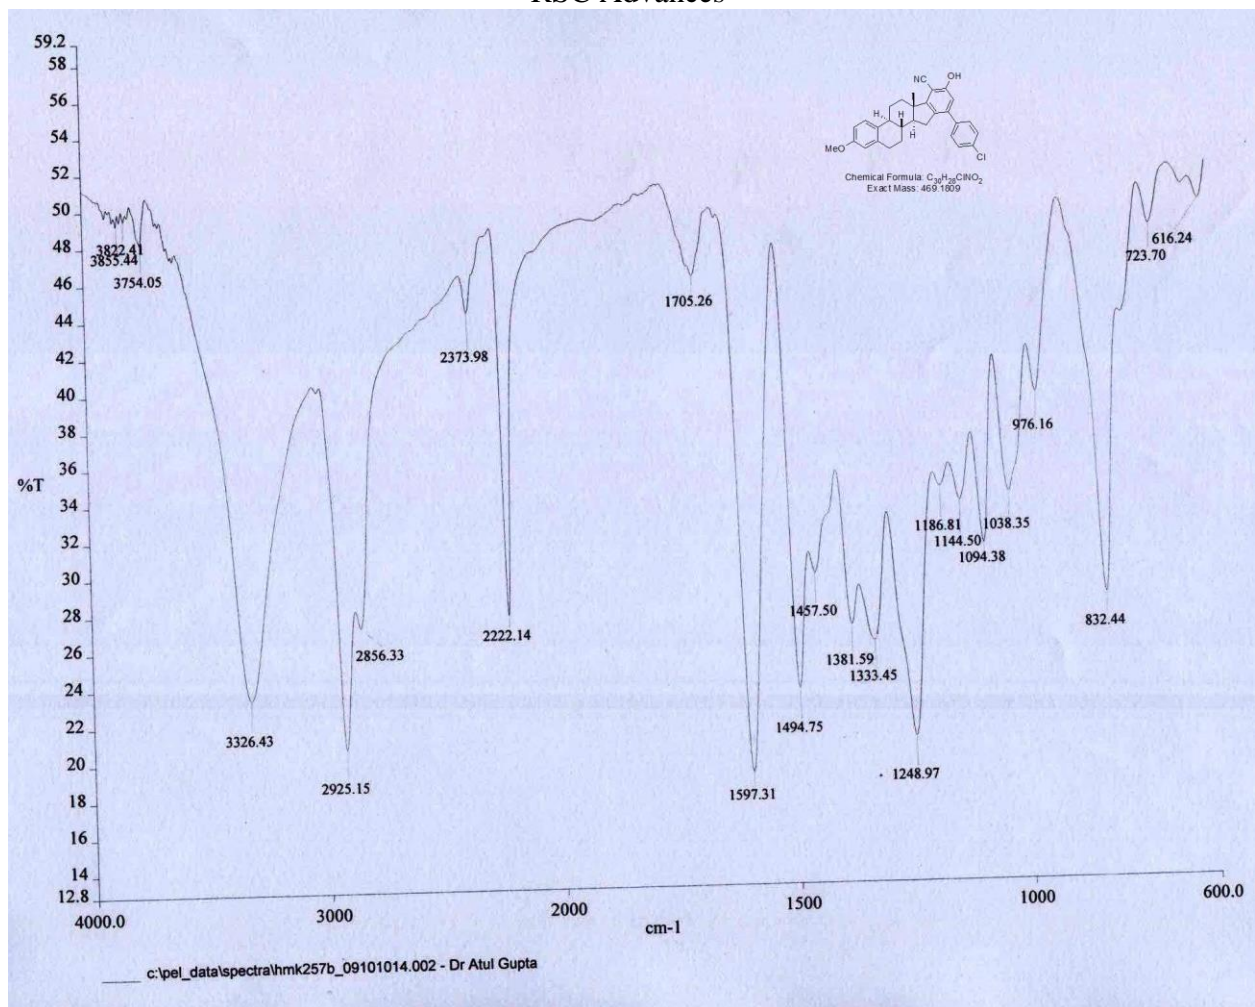



RSC Advances

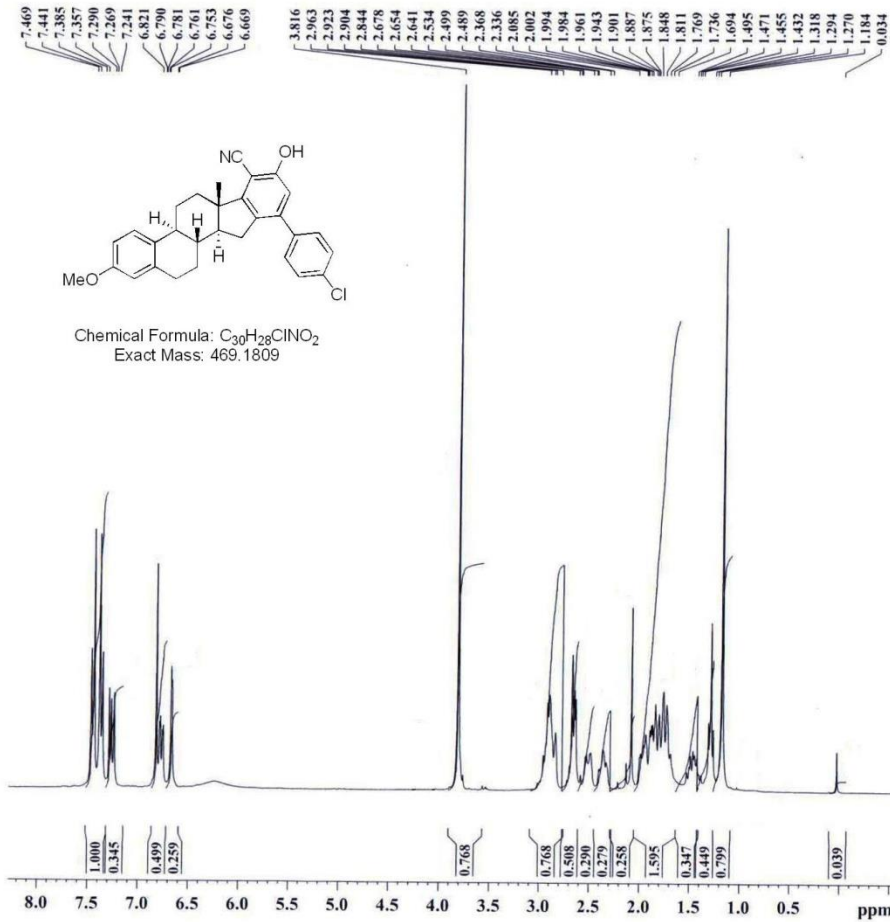

CIMAP PROTON  
PROJECT NO.: mlp-02

Current Data Parameters  
NAME atghmk257b.p  
EXPNO 1  
PROCNO 1

F2 - Acquisition Parameters  
Date\_ 20140918  
Time 13.35  
INSTRUM spect  
PROBHD 5 mm Multinucl  
PULPROG zg30  
TD 65536  
SOLVENT CDCl3  
NS 17  
DS 2  
SWH 8992.806 Hz  
FIDRES 0.137219 Hz  
AQ 3.6438515 sec  
RG 256  
DW 55.600 usec  
DE 6.00 usec  
TE 301.7 K  
D1 1.00000000 sec  
TD0 1

===== CHANNEL f1 =====  
NUC1 1H  
P1 7.15 usec  
PL1 4.00 dB  
SFO1 300.1318534 MHz

F2 - Processing parameters  
SI 32768  
SF 300.1299972 MHz  
WDW EM  
SSB 0  
LB 0.30 Hz  
GB 0  
PC 1.40

RSC Advances

CIMAP-CARBON  
PROJECT NO.: MLP-04

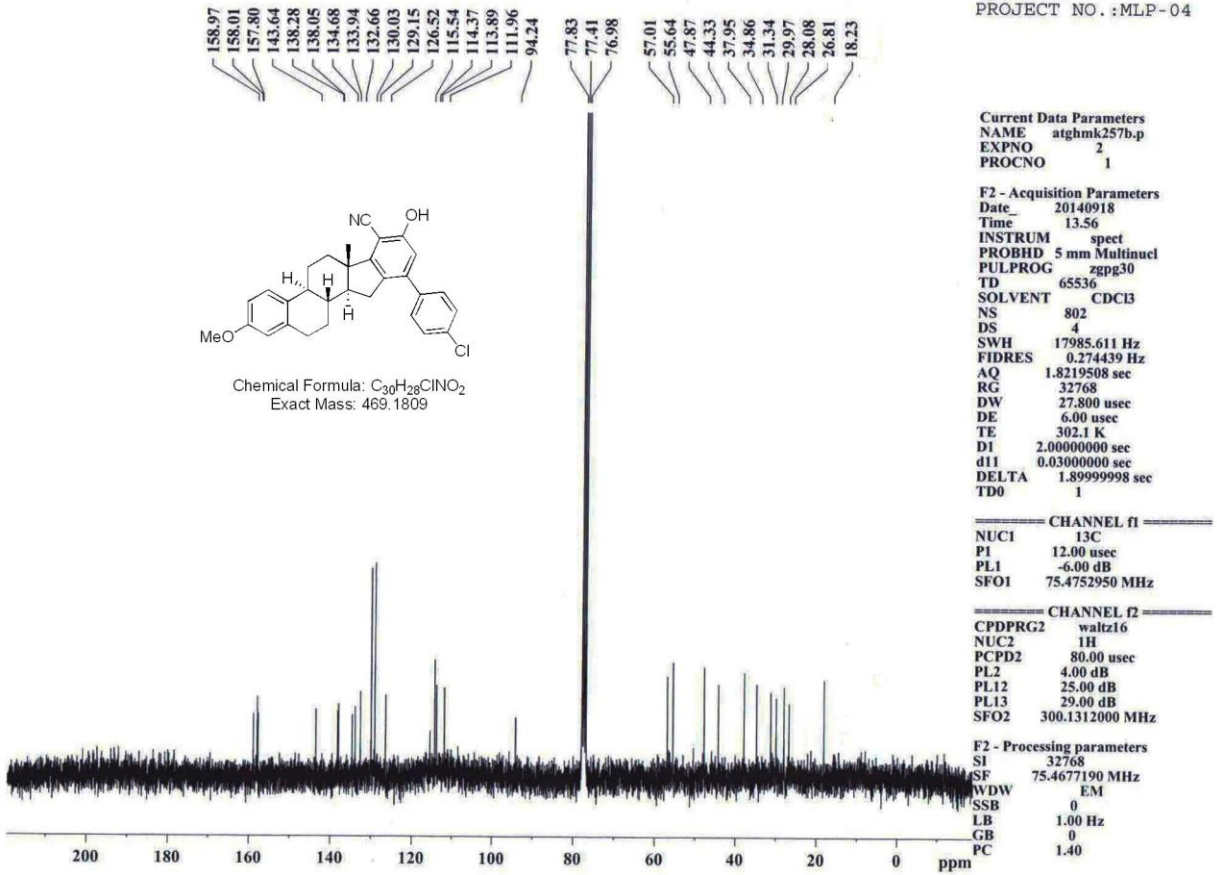

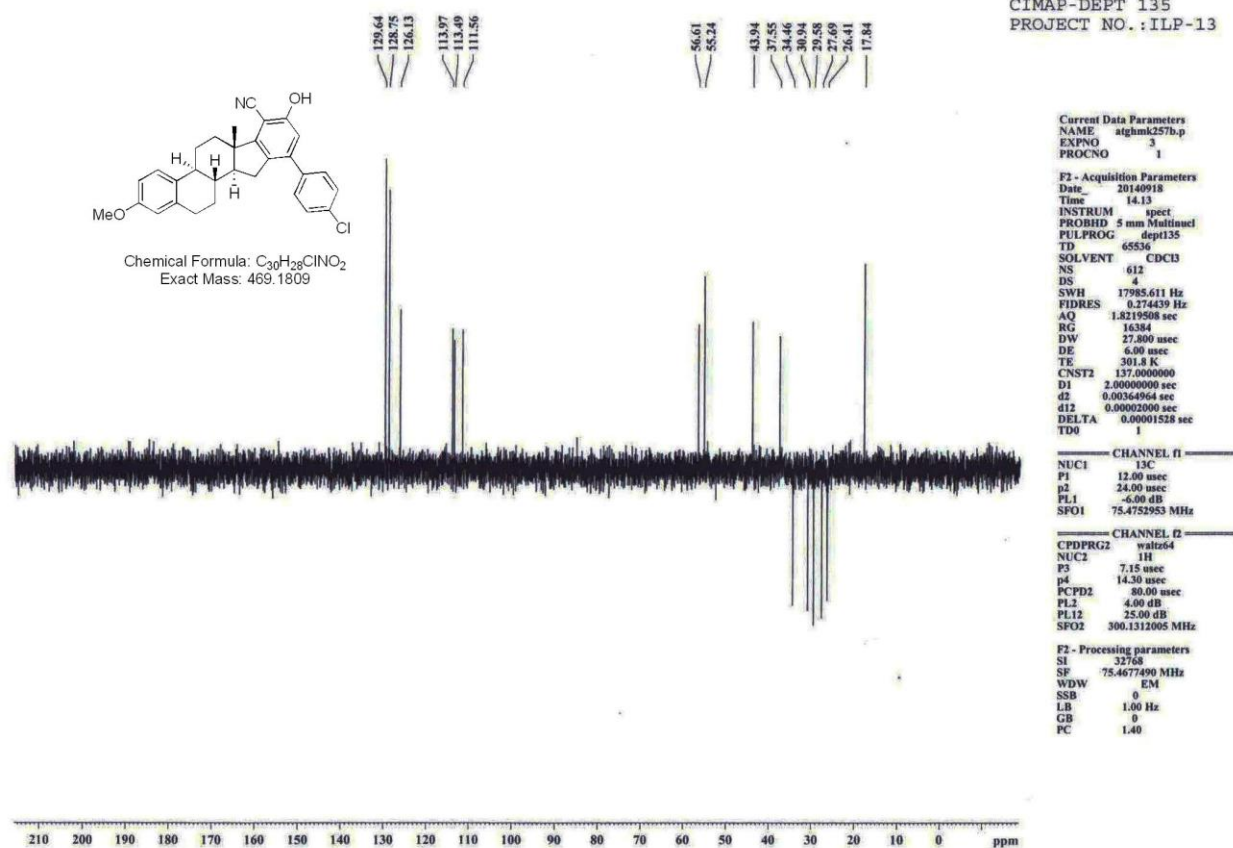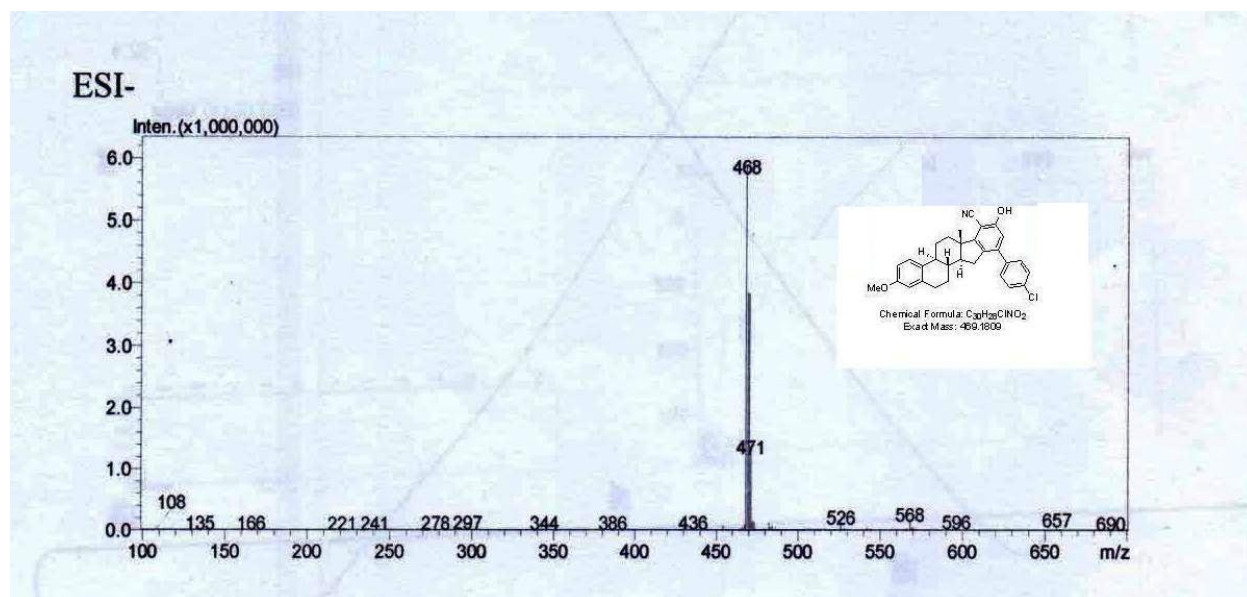

(+)(6bS,8aS,13aS,13bS)-4-methoxy-12-(4-methoxyphenyl)-8a-methyl-10-morpholino-2,6b,7,8,8a,13,13a,13b-octahydro-1H-indeno[2,1-a]phenanthrene-9-carbonitrile (**7d**)

RSC Advances

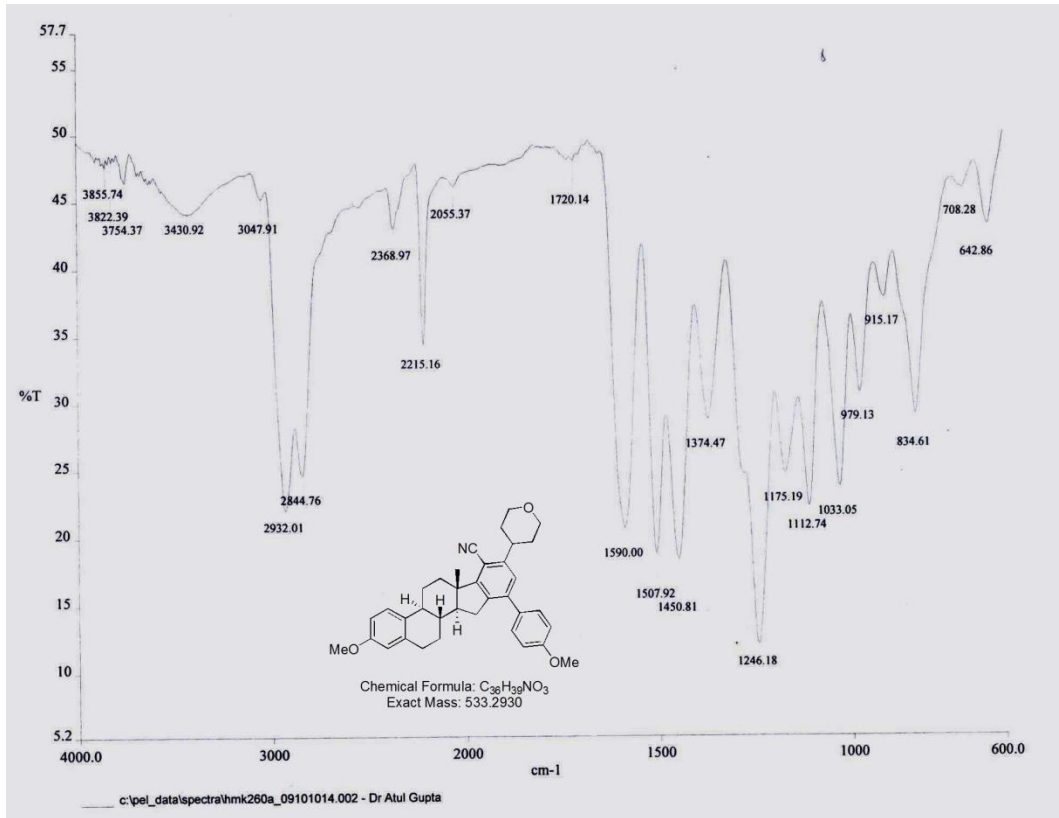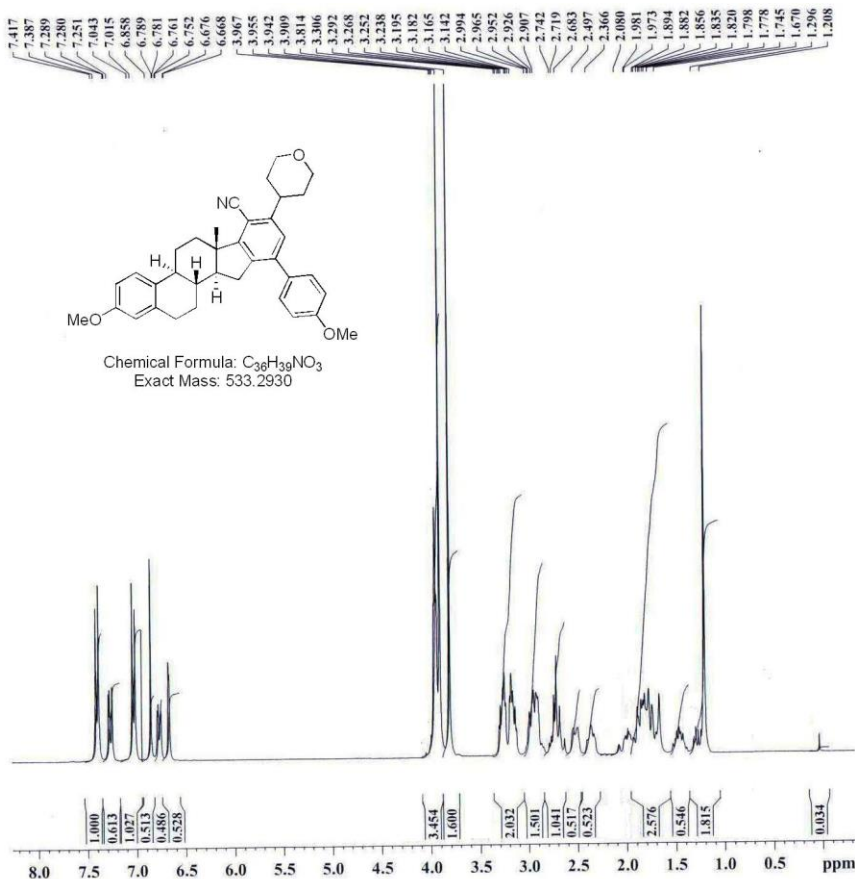

CIMAP PROTON  
PROJECT NO.: mlp-02

Current Data Parameters  
NAME atghmk260a.p  
EXPNO 1  
PROCNO 1

F2 - Acquisition Parameters  
Date 20140806  
Time 15.45  
INSTRUM spect  
PROBHD 5 mm Multinuel  
PULPROG zg30  
TD 65536  
SOLVENT CDCl3  
NS 4  
DS 2  
SWH 8992.806 Hz  
FIDRES 0.137219 Hz  
AQ 3.6438515 sec  
RG 128  
DW 55.600 usec  
DE 6.00 usec  
TE 299.8 K  
D1 1.00000000 sec  
TD0 1

CHANNEL f1  
NUC1 1H  
P1 7.15 usec  
PL1 4.00 dB  
SFO1 300.1318534 MHz

F2 - Processing parameters  
SI 32768  
SF 300.1299972 MHz  
WDW EM  
SSB 0  
LB 0.30 Hz  
GB 0  
PC 1.40

RSC Advances

CIMAP-CARBON  
PROJECT NO.: MLP-04

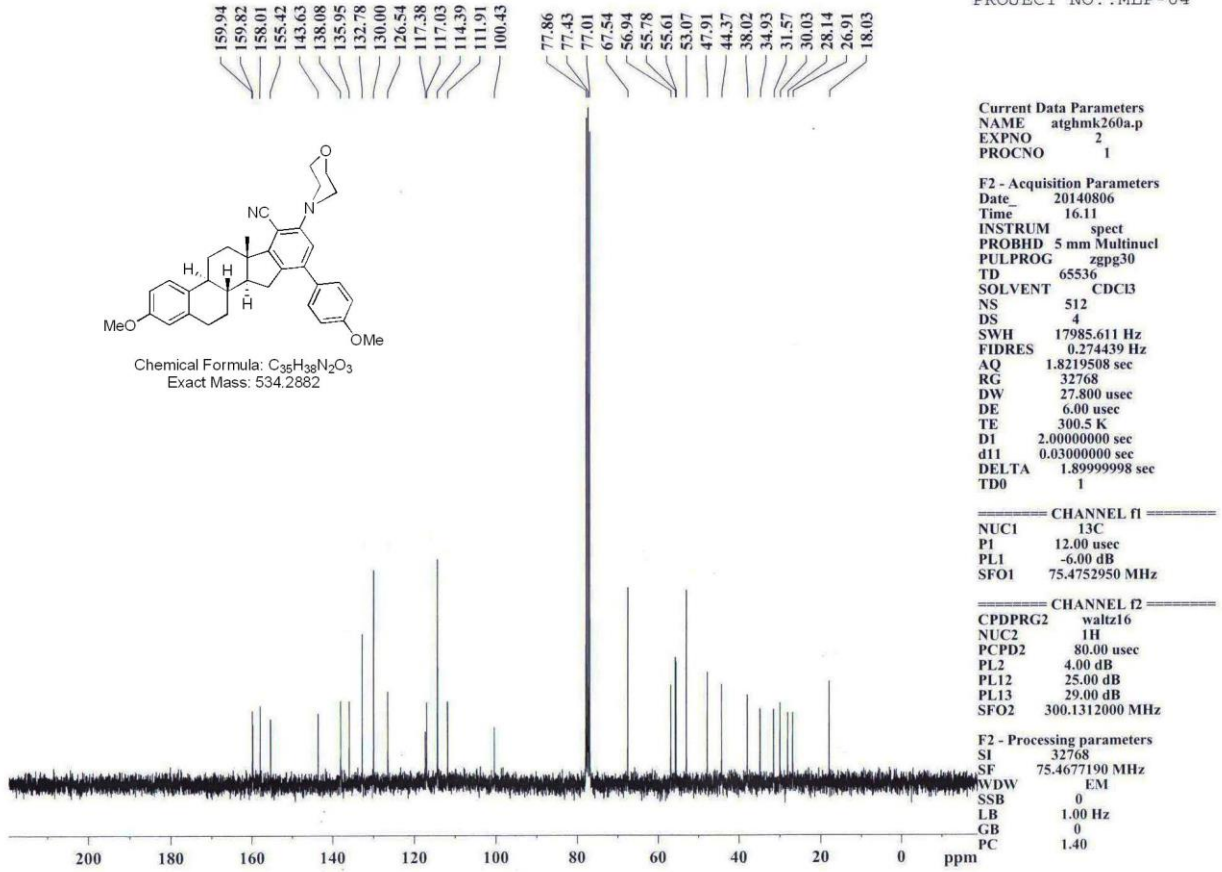

RSC Advances

APT: X, XH2 positiv

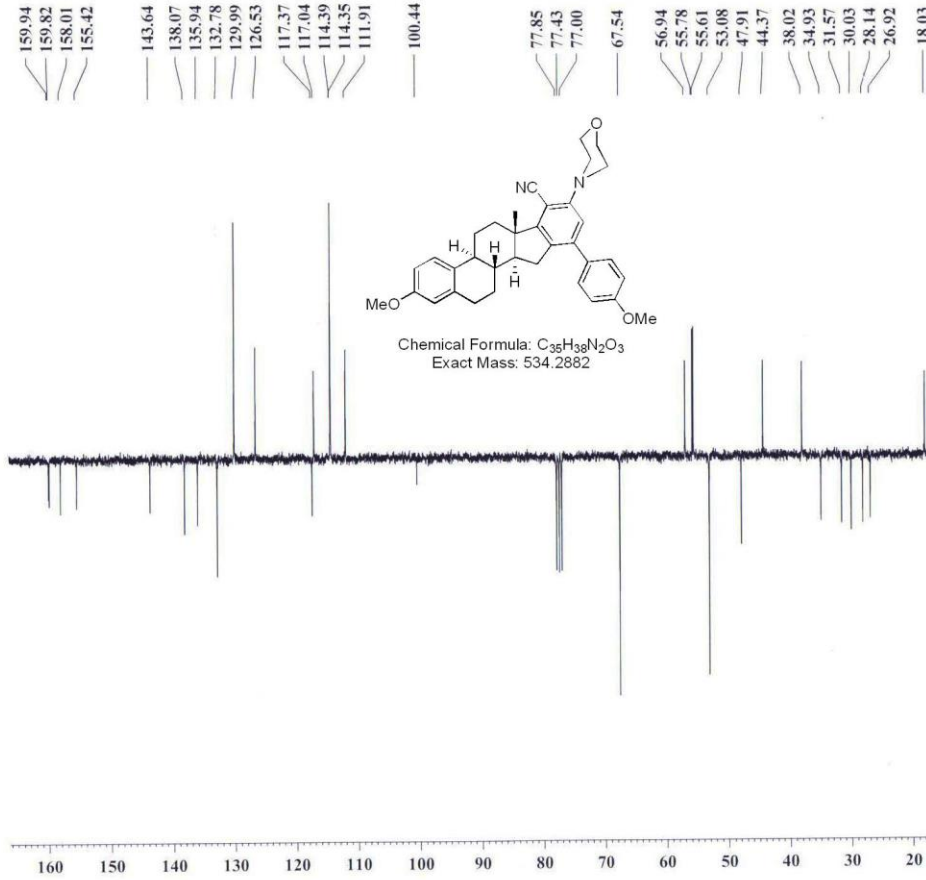

Current Data Parameters  
NAME atghmk260a.p  
EXPNO 3  
PROCNO 1

F2 - Acquisition Parameters  
Date\_ 20140806  
Time 17.13  
INSTRUM spect  
PROBHD 5 mm Multinucl  
PULPROG apt  
TD 65536  
SOLVENT CDCl3  
NS 826  
DS 4  
SWH 17985.611 Hz  
FIDRES 0.274439 Hz  
AQ 1.8219508 sec  
RG 32768  
DW 27.800 usec  
DE 6.00 usec  
TE 300.6 K  
CNST2 145.000000  
CNST11 1.0000000  
D1 2.00000000 sec  
d11 0.03000000 sec  
d20 0.00689655 sec  
D21 0.00000000 sec  
P1 12.00 usec  
TD0 1

CHANNEL f1  
NUC1 13C  
P0 12.00 usec  
p2 24.00 usec  
PL1 -6.00 dB  
SFO1 75.4752950 MHz

CHANNEL f2  
CPDPRG2 waltz16  
NUC2 1H  
PCPD2 80.00 usec  
PL2 4.00 dB  
PL12 25.00 dB  
SFO2 300.1312000 MHz

F2 - Processing parameters  
SI 32768  
SF 75.4677190 MHz  
WDW EM  
SSB 0  
LB 1.00 Hz  
GB 0  
PC 1.40

Sample ID: NR-ATG-260A  
Acquisition Date: 02/05/15 14:44:02

15I05FEB61 #15-36 RT: 0.30-0.70 AV: 22 SB: 2 0.00, 0.00 NL: 5.25E7  
T: + c ESI Full ms [ 150.00-1500.00]

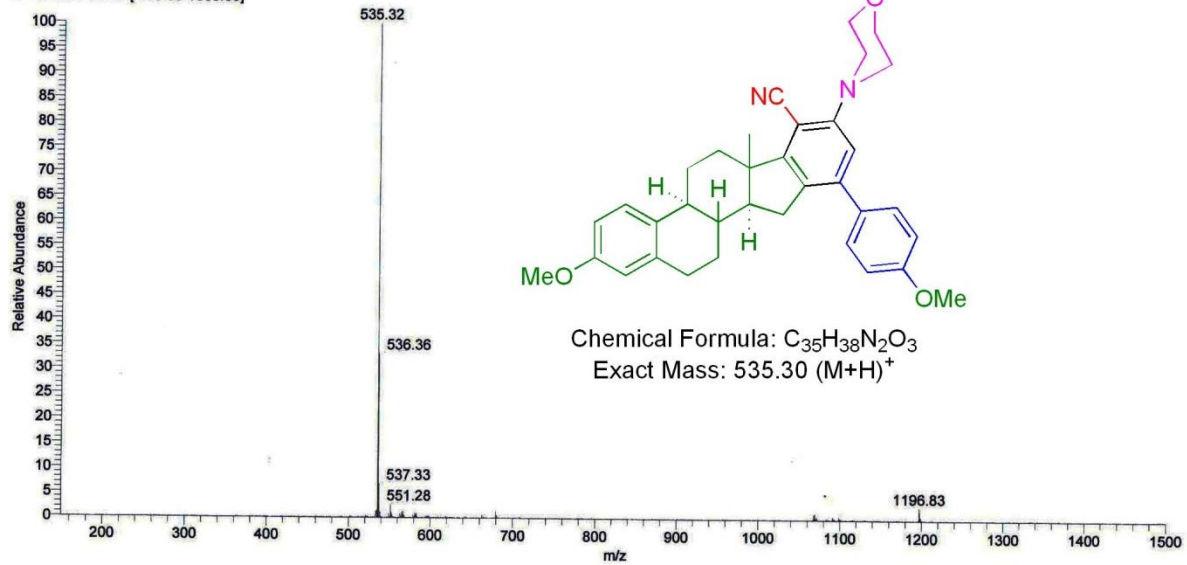

ION TRAP LCQ ADVANTAGE MAX  
THERMO ELECTRON CORPORATION

MCS-7D #4-19 RT: 0.02-0.13 AV: 16 NL: 9.22E6  
T: FTMS {1,1} +p ESI Full ms [150.00-2000.00]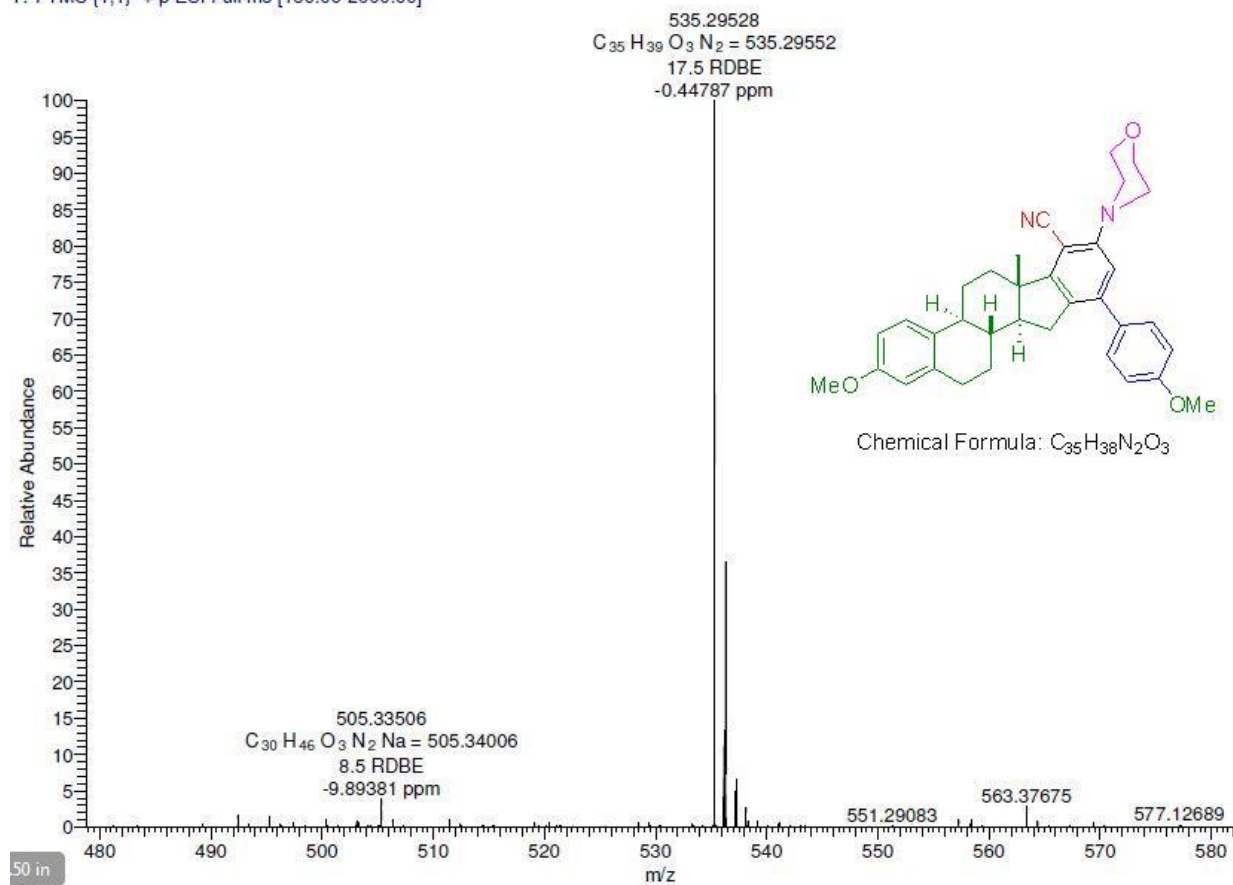

(6bS,8aS,13aS,13bS)-10-hydroxy-4-methoxy-12-(4-methoxyphenyl)-8a-methyl-2,6b,7,8,8a,9,10,13,13a,13b-decahydro-1H-indeno[2,1-a]phenanthrene-9-carbonitrile (**8d**)

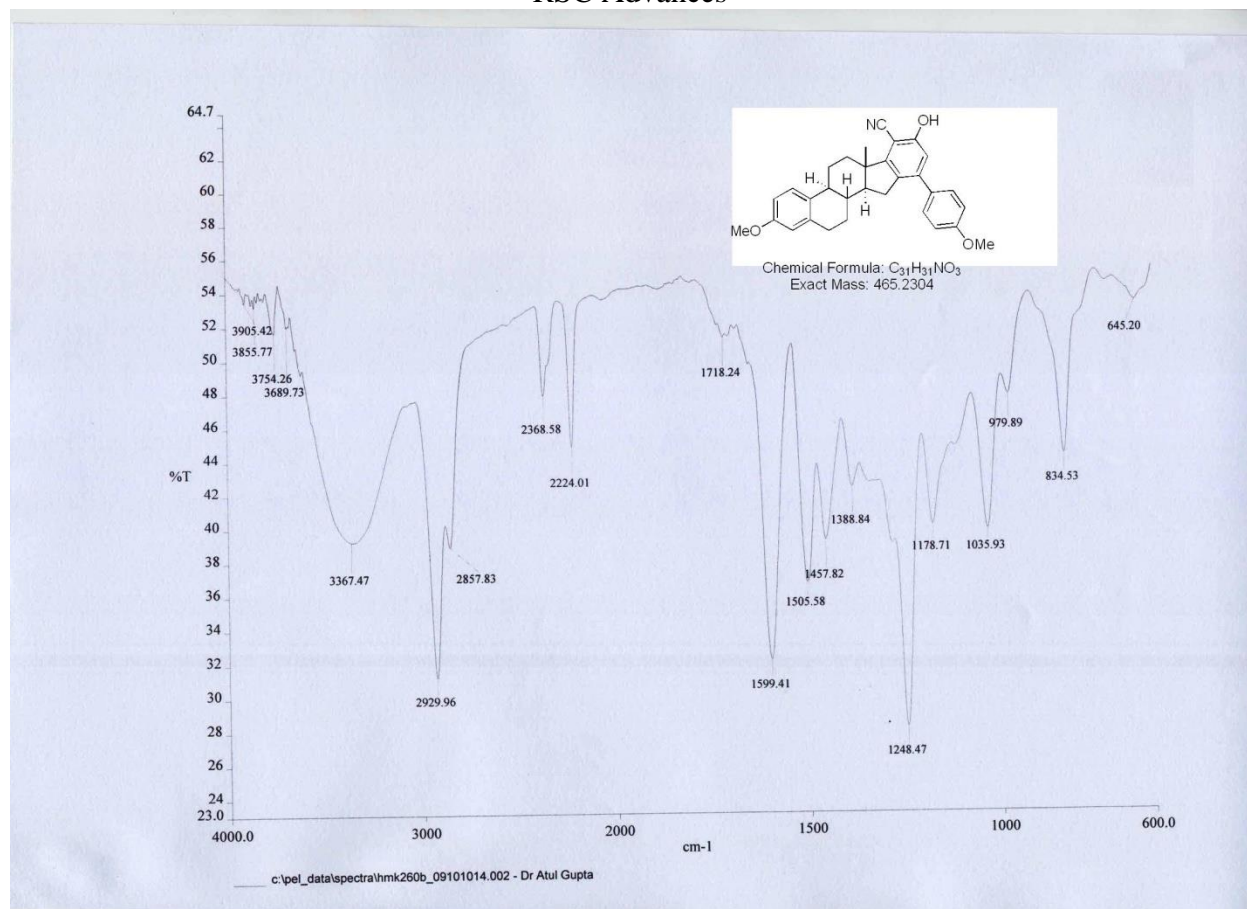



# RSC Advances

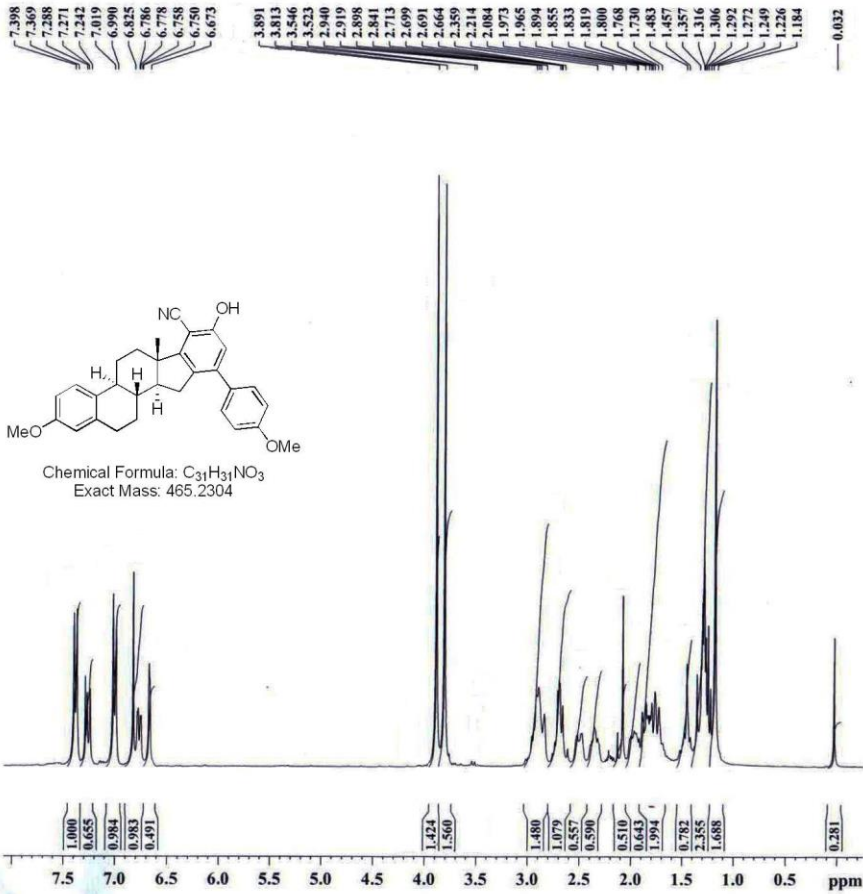

CIMAP PROTON  
PROJECT NO.: mlp-02

Current Data Parameters  
NAME atghmk260b.p  
EXPNO 1  
PROCNO 1

F2 - Acquisition Parameters  
Date 20141125  
Time 12.52  
INSTRUM spect  
PROBHD 5 mm Multinucl  
PULPROG zg30  
TD 65536  
SOLVENT CDCl3  
NS 16  
DS 2  
SWH 6172.839 Hz  
FIDRES 0.094190 Hz  
AQ 5.3084660 sec  
RG 228.1  
DW 81.000 usec  
DE 6.00 usec  
TE 298.5 K  
D1 1.00000000 sec  
TD0 1

CHANNEL f1  
NUC1 1H  
PI 7.15 usec  
PL1 4.00 dB  
SFO1 300.1318534 MHz

F2 - Processing parameters  
SI 32768  
SF 300.1299974 MHz  
WDW EM  
SSB 0  
LB 0.30 Hz  
GB 0  
PC 1.40

RSC Advances

CIMAP-CARBON  
PROJECT NO.:MLP-04

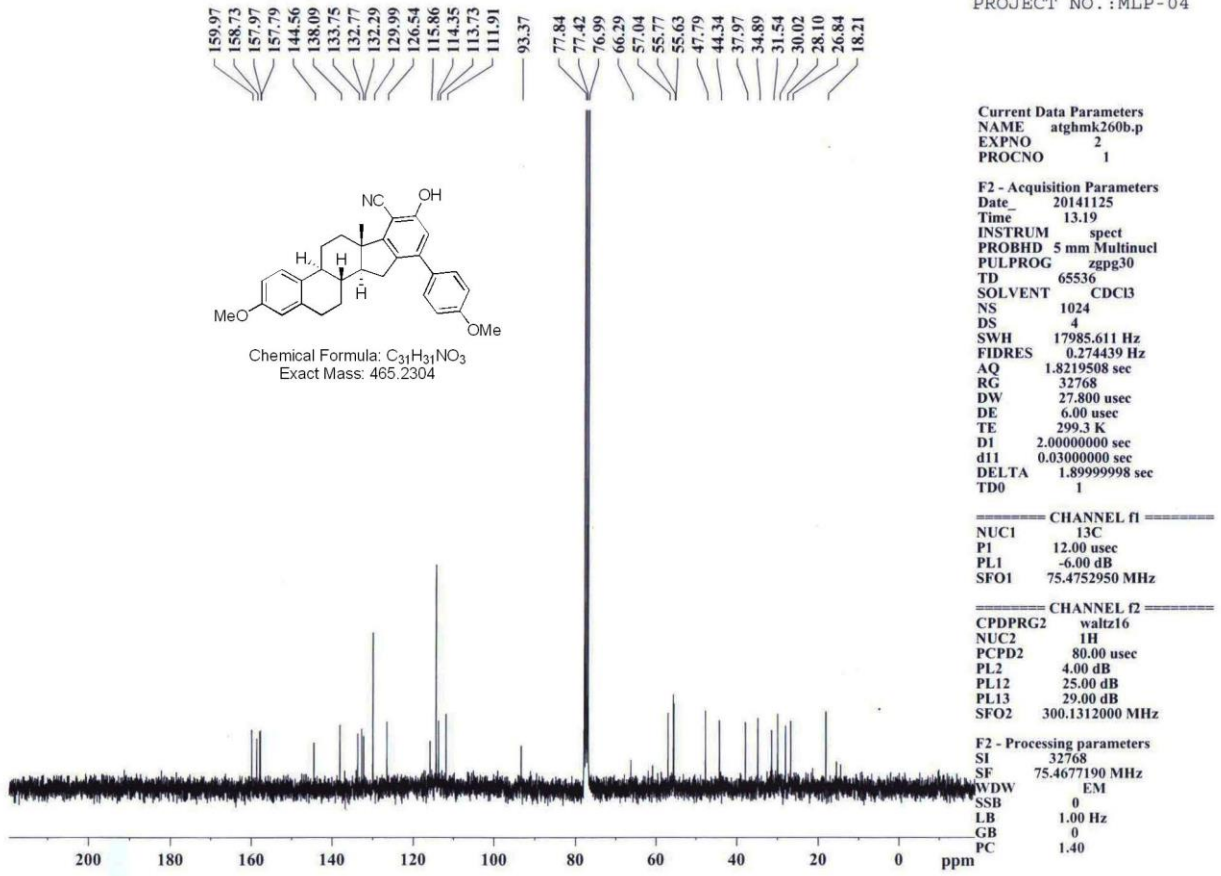

# RSC Advances

CIMAP-DEPT 135  
PROJECT NO.: ILP-13

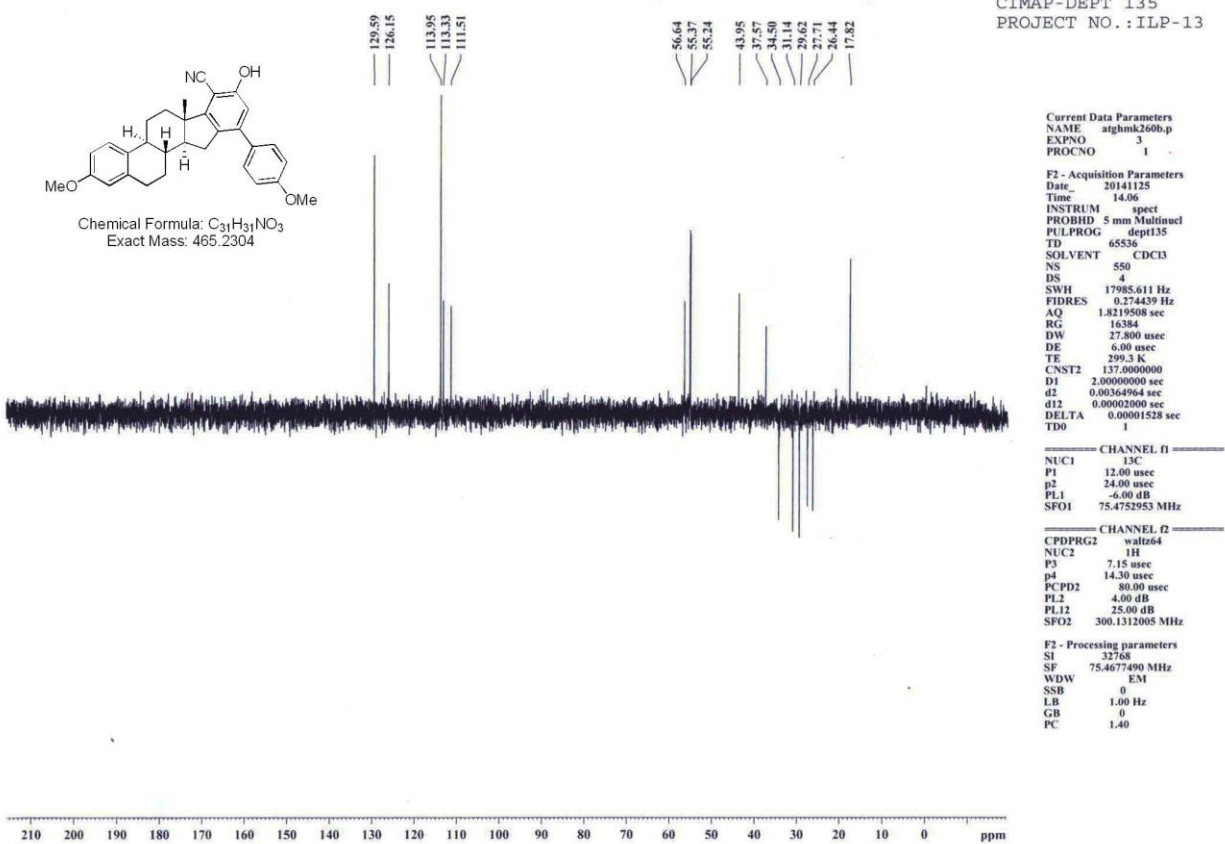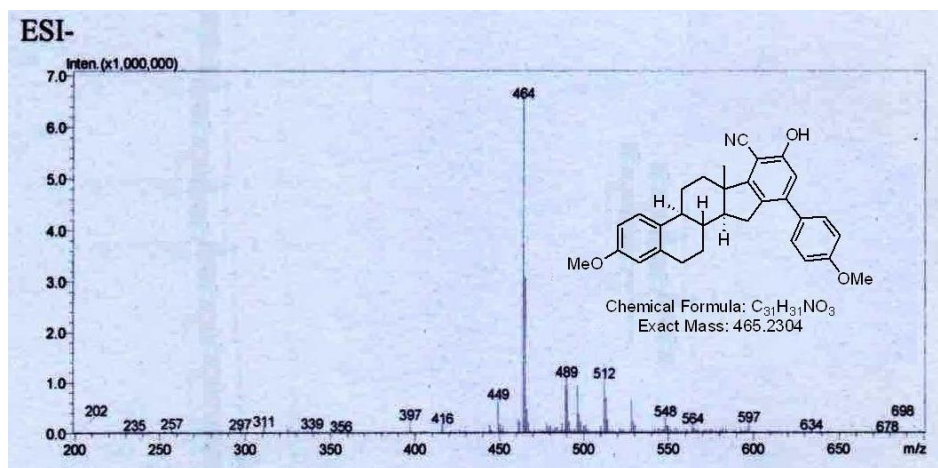

(+)(6*b*S,8*a*S,13*a*S,13*b*S)-4-methoxy-8*a*-methyl-12-phenyl-10-(piperidin-1-yl)-2,6*b*,7,8,8*a*,13,13*a*,13*b*-octahydro-1*H*-indeno[2,1-*a*]phenanthrene-9-carbonitrile (**7e**)

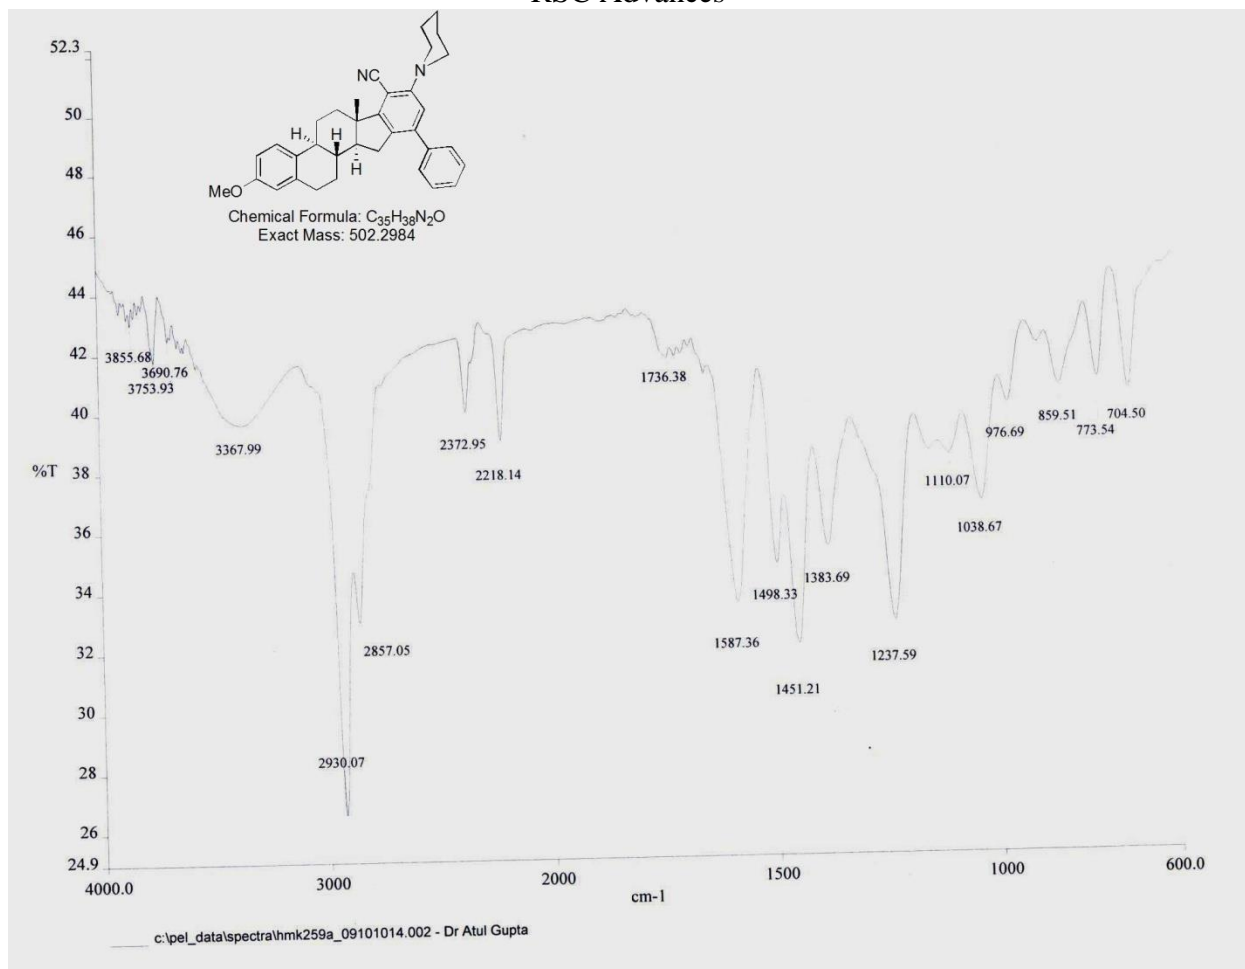

RSC Advances

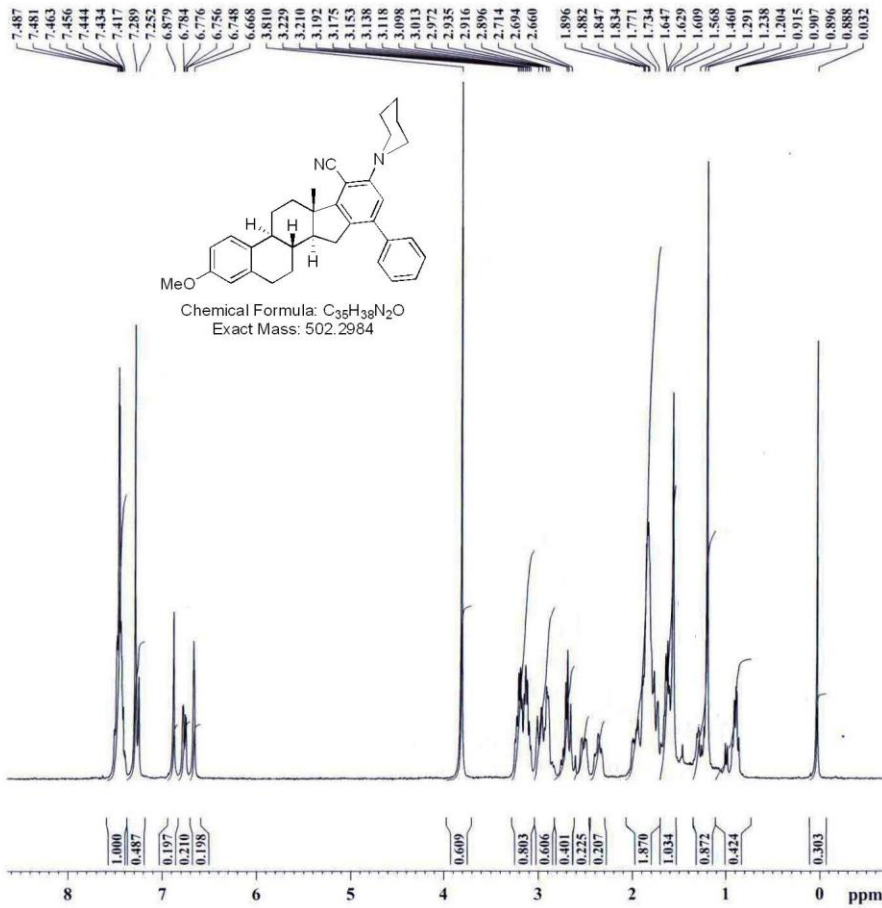

CIMAP PROTON  
PROJECT NO.: mlp-02

**Current Data Parameters**  
NAME atghmk259ar.p  
EXPNO 1  
PROCNO 1

**F2 - Acquisition Parameters**  
Date\_ 20140825  
Time 16.23  
INSTRUM spect  
PROBHD 5 mm Multinucl  
PULPROG zg30  
TD 65536  
SOLVENT CDCl3  
NS 16  
DS 2  
SWH 8992.806 Hz  
FIDRES 0.137219 Hz  
AQ 3.6438515 sec  
RG 812.7  
DW 55.600 usec  
DE 6.00 usec  
TE 302.0 K  
D1 1.00000000 sec  
TD0 1

===== CHANNEL f1 =====  
NUC1 1H  
P1 7.15 usec  
PL1 4.00 dB  
SFO1 300.1318534 MHz

**F2 - Processing parameters**  
SI 32768  
SF 300.1299972 MHz  
WDW EM  
SSB 0  
LB 0.30 Hz  
GB 0  
PC 1.40

RSC Advances

CIMAP-CARBON  
PROJECT NO. :MLP-04

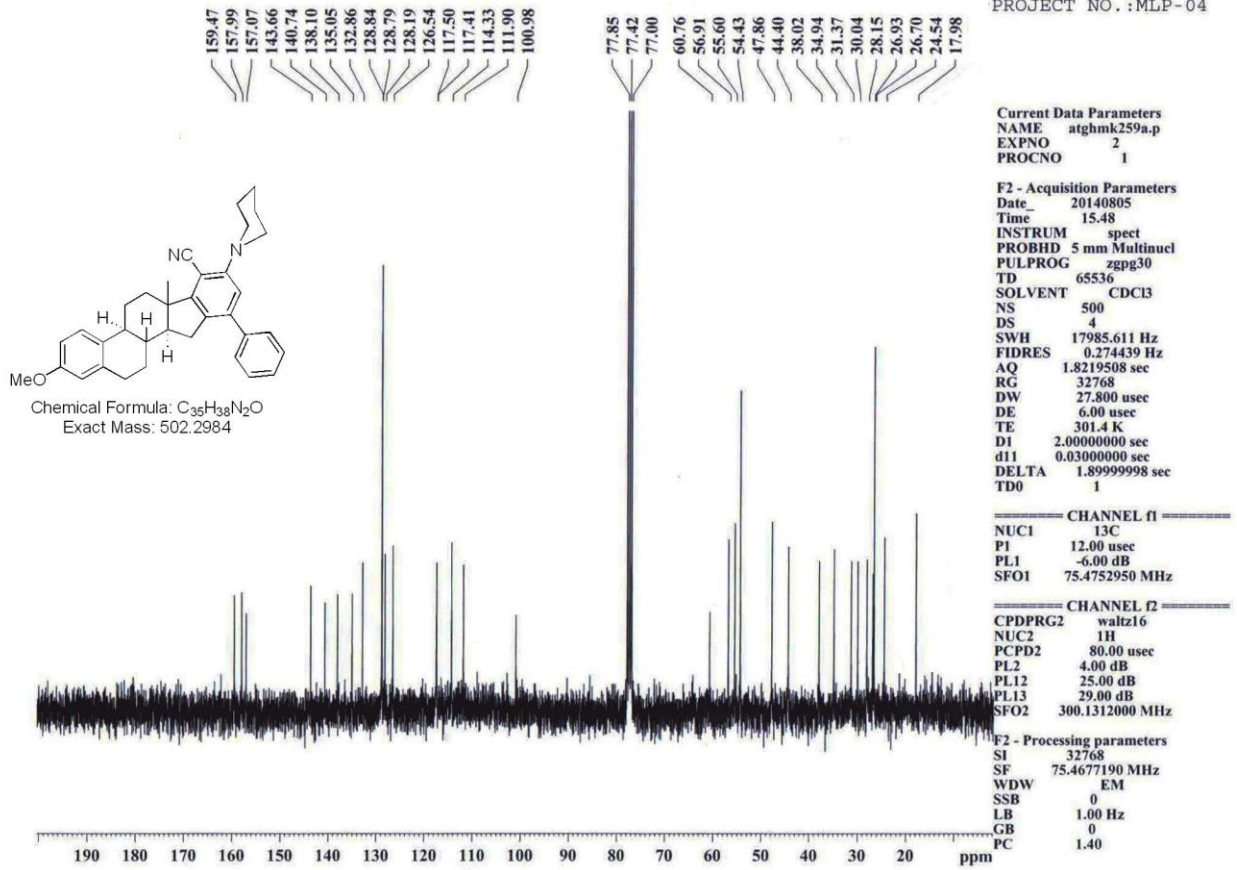

RSC Advances

APT: X, XH2 positiv

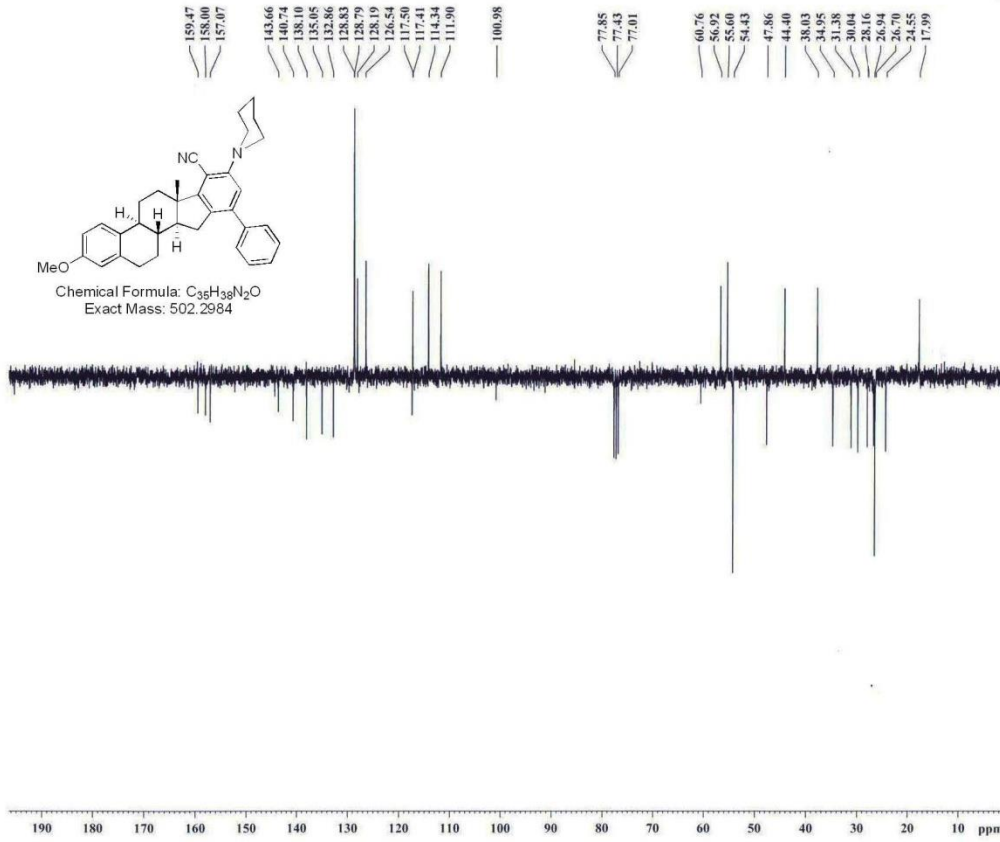

Current Data Parameters  
NAME atgmk259a.p  
EXPNO 3  
PROCNO 1

F2 - Acquisition Parameters  
Date\_ 20140805  
Time 16.30  
INSTRUM spect  
PROBHD 5 mm Multinucl  
PULPROG apt  
TD 65536  
SOLVENT CDCl3  
NS 271  
DS 4  
SWH 17985.611 Hz  
FIDRES 0.274439 Hz  
AQ 1.8219508 sec  
RG 32768  
DW 27.800 usec  
DE 6.00 usec  
TE 302.0 K  
CNST2 145.000000  
CNST1 1.000000  
DI 2.0000000 sec  
d11 0.0300000 sec  
d20 0.00689655 sec  
D21 0.0000000 sec  
P1 12.00 usec  
TD0 1

CHANNEL f1  
NUC1 13C  
P0 12.00 usec  
p2 24.00 usec  
PL1 -6.00 dB  
SFO1 75.4752950 MHz

CHANNEL f2  
CPDPRG2 waltz16  
NUC2 1H  
PCPD2 80.00 usec  
PL2 4.00 dB  
PL12 25.00 dB  
SFO2 300.1312000 MHz

F2 - Processing parameters  
SI 32768  
SF 75.467190 MHz  
WDW EM  
SSB 0  
LB 1.00 Hz  
GB 0  
PC 1.40

Sample ID: NR-ATG-259A  
Acquisition Date: 02/04/15 14:03:33

15I04FEB54 #15-35 RT: 0.30-0.69 AV: 21 SB: 2 0.01, 0.01 NL: 2.90E7  
T: +c ESI Full ms [ 150.00-1500.00]

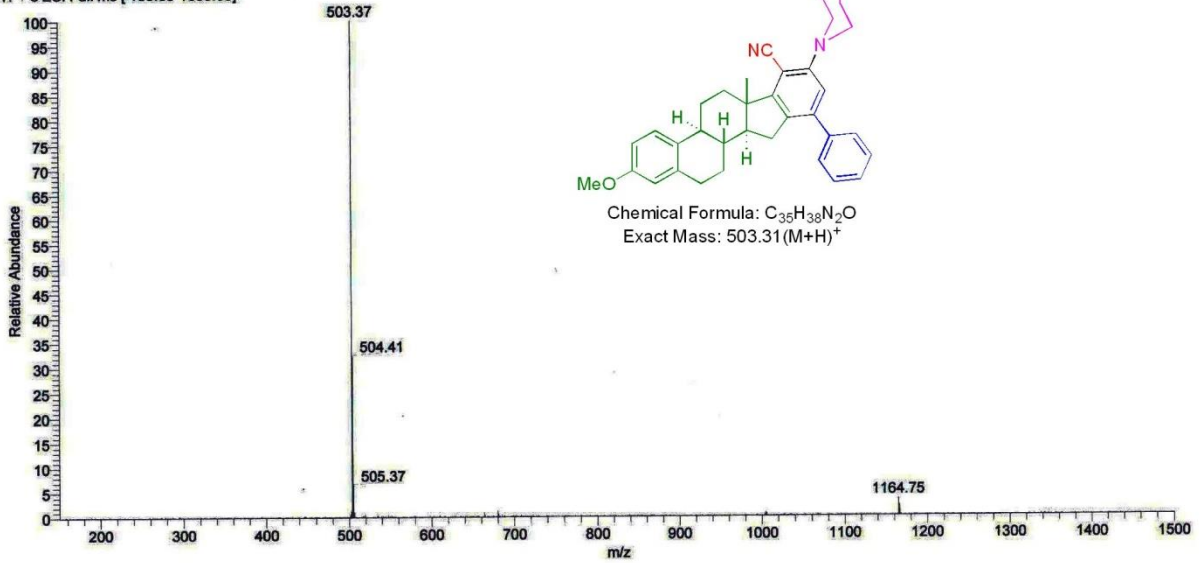

ION TRAP LCQ ADVANTAGE MAX  
THERMO ELECTRON CORPORATION

MCS-7E #4-19 RT: 0.02-0.13 AV: 16 NL: 9.83E6  
T: FTMS {1,1} + p ESI Full ms [150.00-2000.00]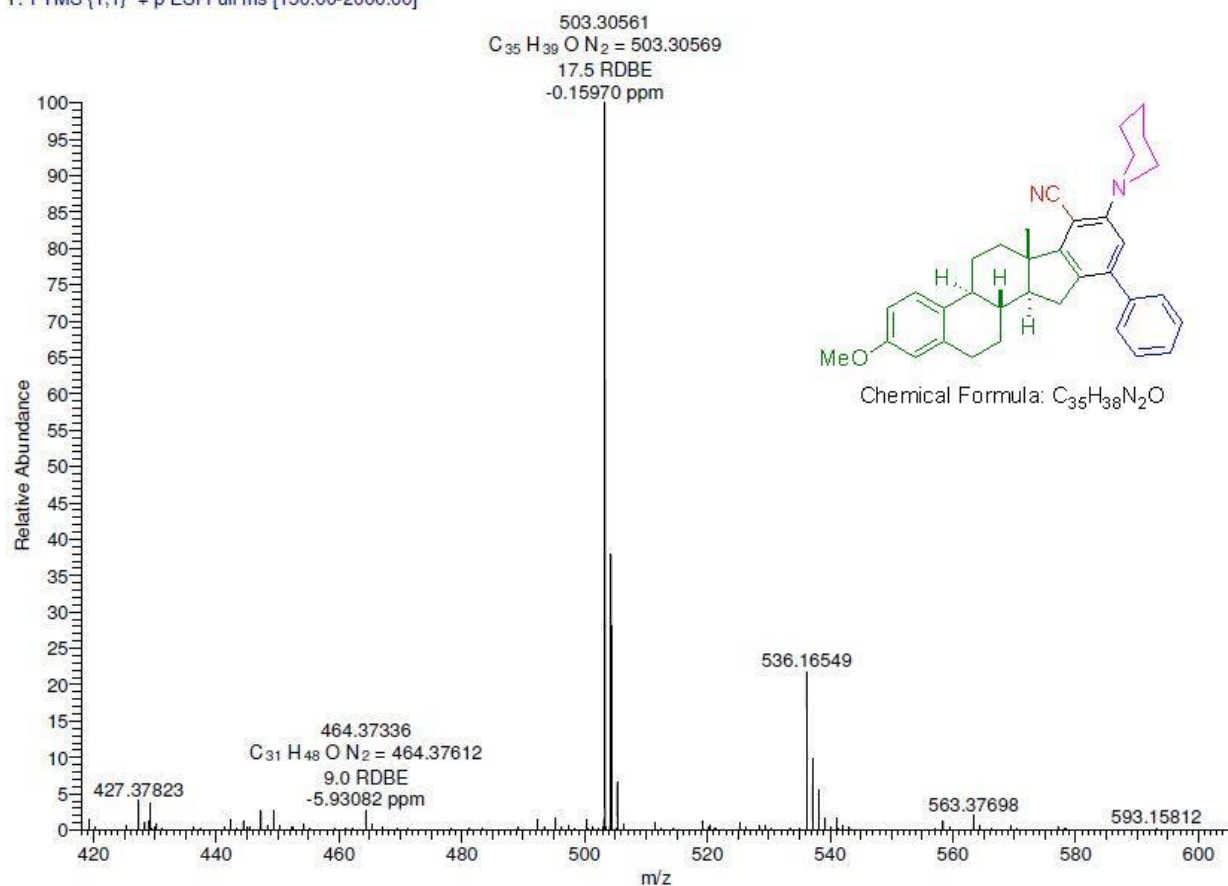

(6bS,8aS,13aS,13bS)-10-hydroxy-4-methoxy-8a-methyl-12-phenyl-2,6b,7,8,8a,13,13a,13b-octahydro-1H-indeno[2,1-a]phenanthrene-9-carbonitrile (**8e**)



# RSC Advances

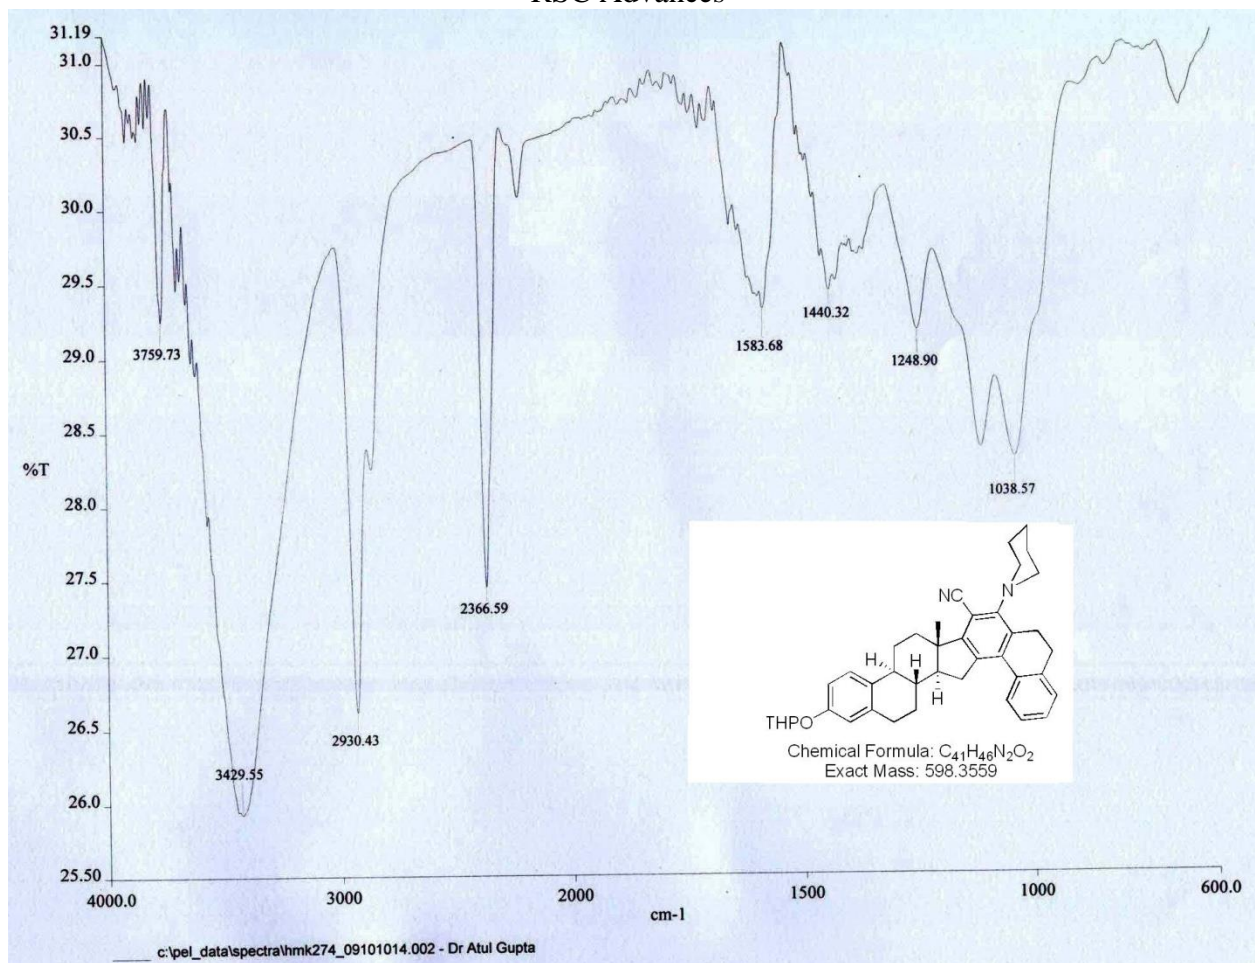

# RSC Advances

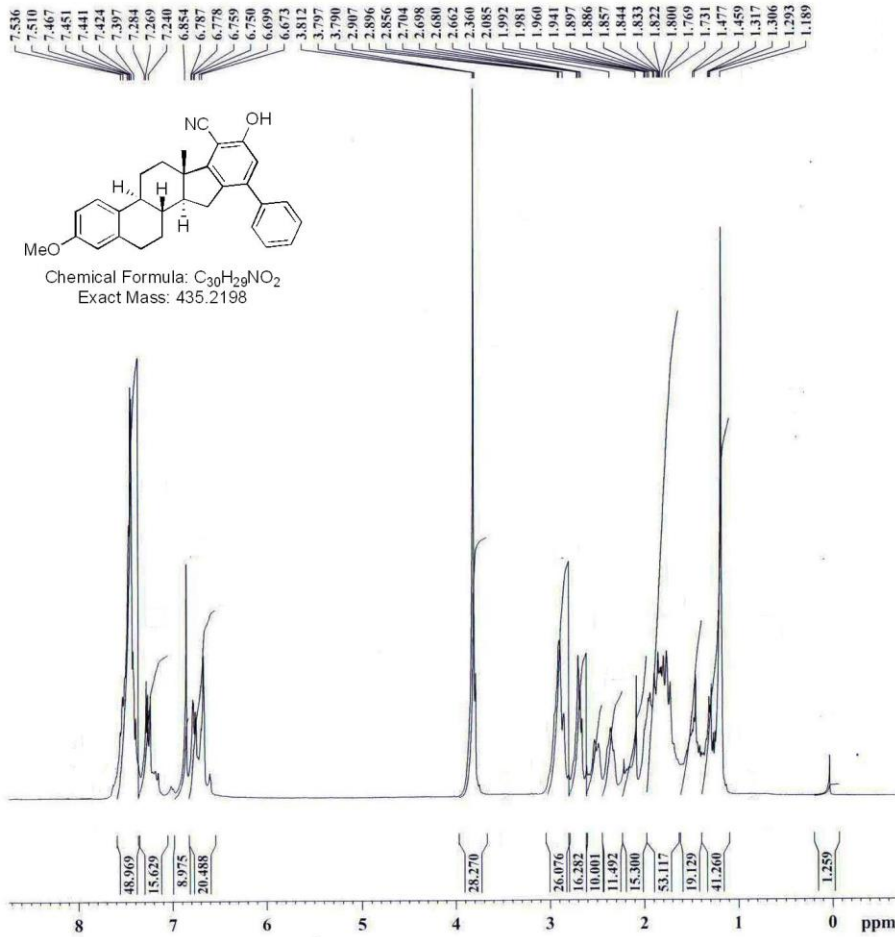

CIMAP PROTON  
PROJECT NO.: mlp-02

Current Data Parameters  
NAME atghmk259b.p  
EXPNO 1  
PROCNO 1

F2 - Acquisition Parameters  
Date\_ 20140807  
Time 10.04  
INSTRUM spect  
PROBHD 5 mm Multinucl  
PULPROG zg30  
TD 65536  
SOLVENT CDCl3  
NS 17  
DS 2  
SWH 8992.806 Hz  
FIDRES 0.137219 Hz  
AQ 3.6438515 sec  
RG 128  
DW 55.600 usec  
DE 6.00 usec  
TE 299.0 K  
D1 1.00000000 sec  
TD0 1

==== CHANNEL f1 ====  
NUC1 1H  
P1 7.15 usec  
PL1 4.00 dB  
SFO1 300.1318534 MHz

F2 - Processing parameters  
SI 32768  
SF 300.1299972 MHz  
WDW EM  
SSB 0  
LB 0.30 Hz  
GB 0  
PC 1.40

RSC Advances

CIMAP-CARBON  
PROJECT NO.:MLP-04

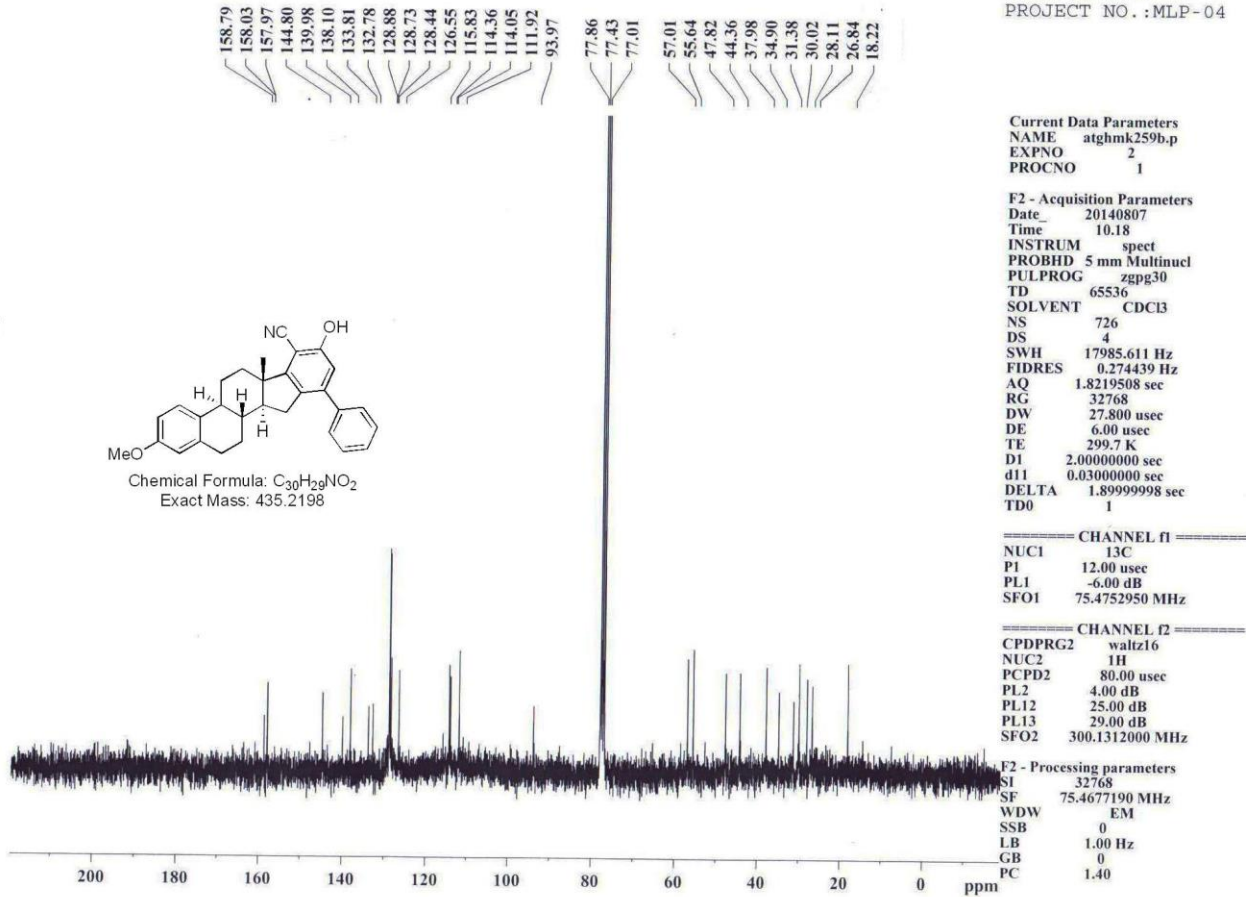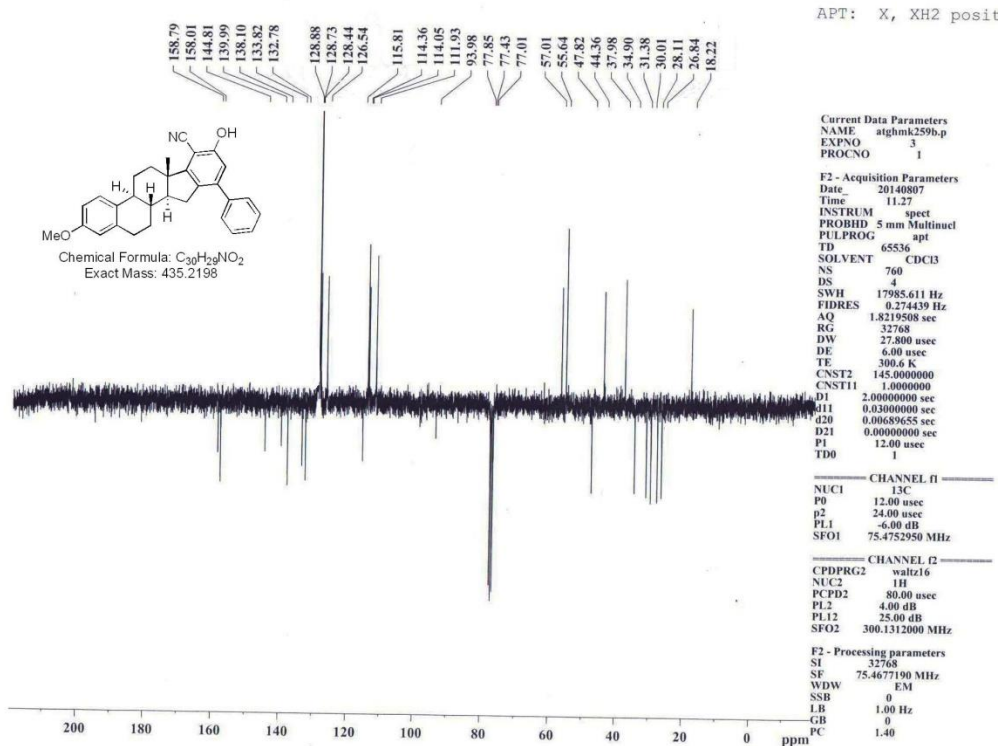

15I23FEB49 #19-44 RT: 0.30-0.71 AV: 26 SB: 2 0.00, 0.00 NL: 8.01E5  
T: + c ESI Full ms [ 150.00-1000.00]

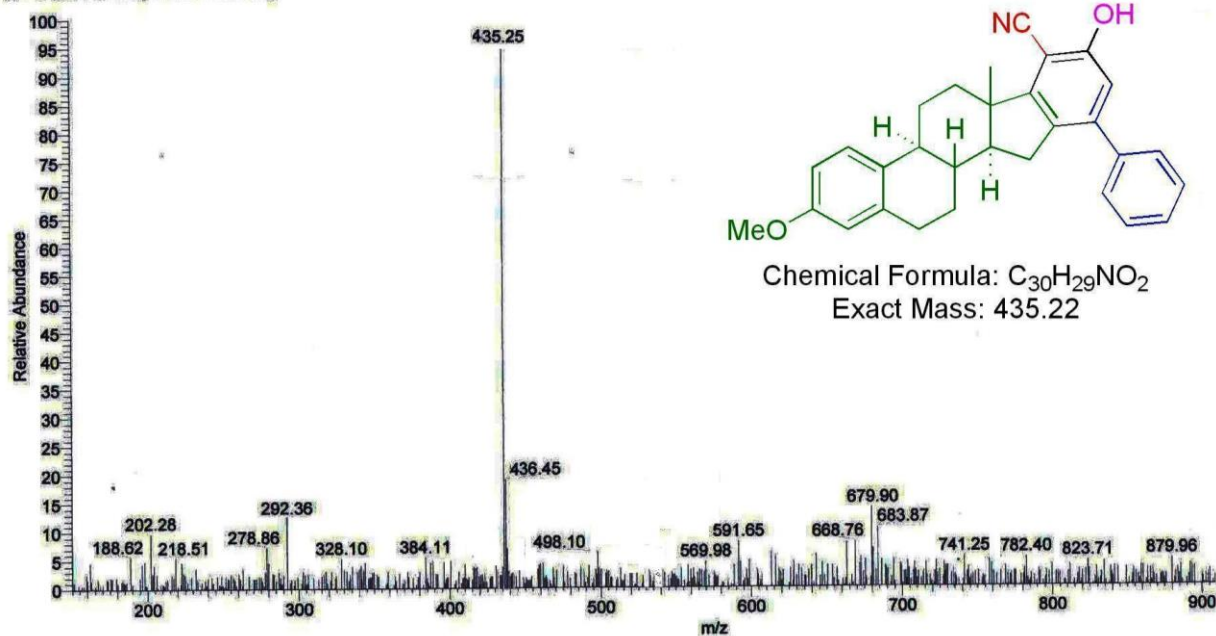

ION TRAP LCQ ADVANTAGE MAX  
THERMO ELECTRON CORPORATION

CAIICT HRMS-03.09.2014...MCS-8E  
PAVAN

CSIR-INDIAN INSTITUTE OF CHEMICAL TECHNOLOGY  
NATIONAL CENTRE FOR MASS SPECTROMETRY

11-05-15 13:11:07

MCS-8E #4-19 RT: 0.02-0.13 AV: 16 NL: 6.28E4  
T: FTMS {1,1} + p ESI Full ms [150.00-2000.00]

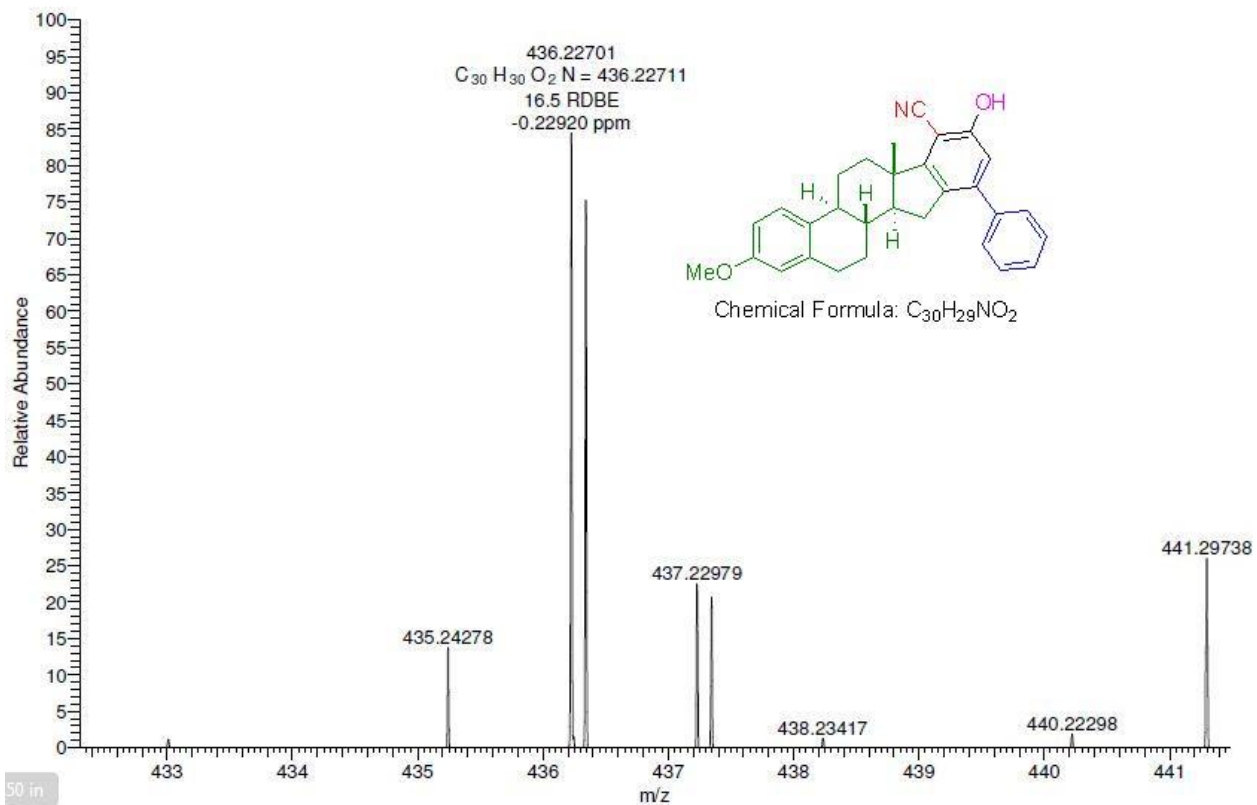

50 in

RSC Advances

(+)(6bS,8aS,13aS,13bS)-12-(4-chlorophenyl)-4-ethoxy-8a-methyl-10-(piperidin-1-yl)-2,6b,7,8,8a,13,13a,13b-octahydro-1*H*-indeno[2,1-*a*]phenanthrene-9-carbonitrile (**7f**)

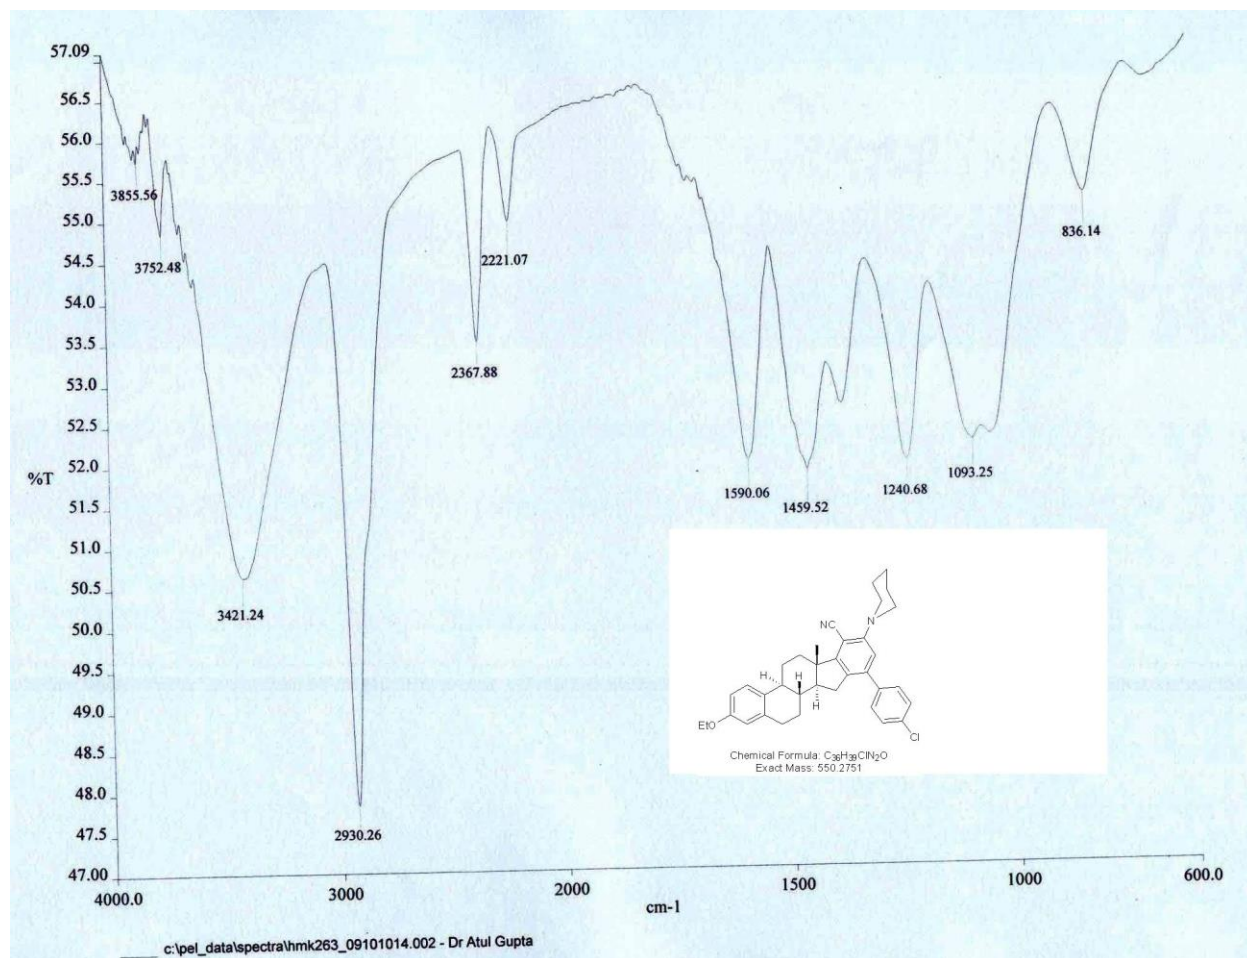

RSC Advances

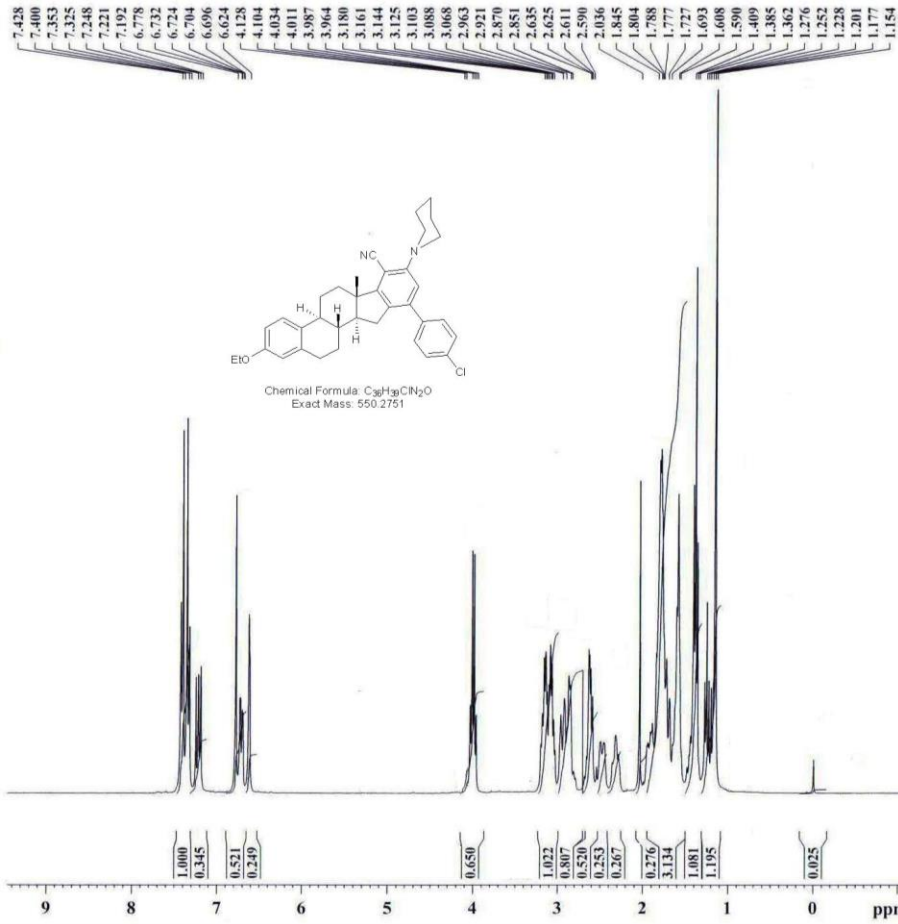

CIMAP PROTON  
PROJECT NO.: mlp-02

Current Data Parameters  
NAME atghmk263.p  
EXPNO 1  
PROCNO 1

F2 - Acquisition Parameters  
Date\_ 20140811  
Time 16.46  
INSTRUM spect  
PROBHD 5 mm Multinucl  
PULPROG zg30  
TD 65536  
SOLVENT CDCl3  
NS 23  
DS 2  
SWH 8992.806 Hz  
FIDRES 0.137219 Hz  
AQ 3.6438515 sec  
RG 161.3  
DW 55.600 usec  
DE 6.00 usec  
TE 301.3 K  
D1 1.00000000 sec  
TD0 1

===== CHANNEL f1 =====  
NUC1 1H  
P1 7.15 usec  
PL1 4.00 dB  
SFO1 300.1318534 MHz

F2 - Processing parameters  
SI 32768  
SF 300.1300091 MHz  
WDW EM  
SSB 0  
LB 0.30 Hz  
GB 0  
PC 1.40

# RSC Advances

CIMAP-CARBON  
PROJECT NO.: MLP-04

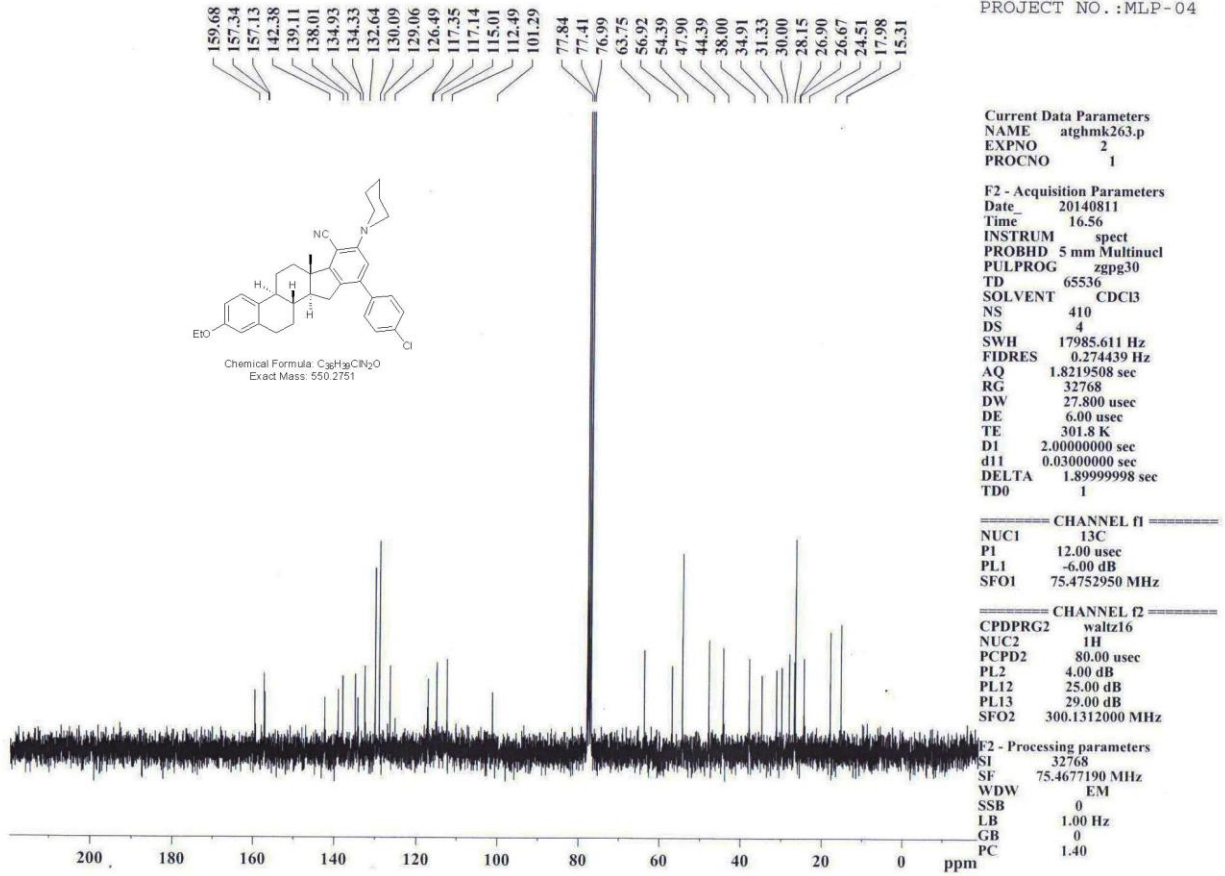

# RSC Advances

APT: X, XH2 positi

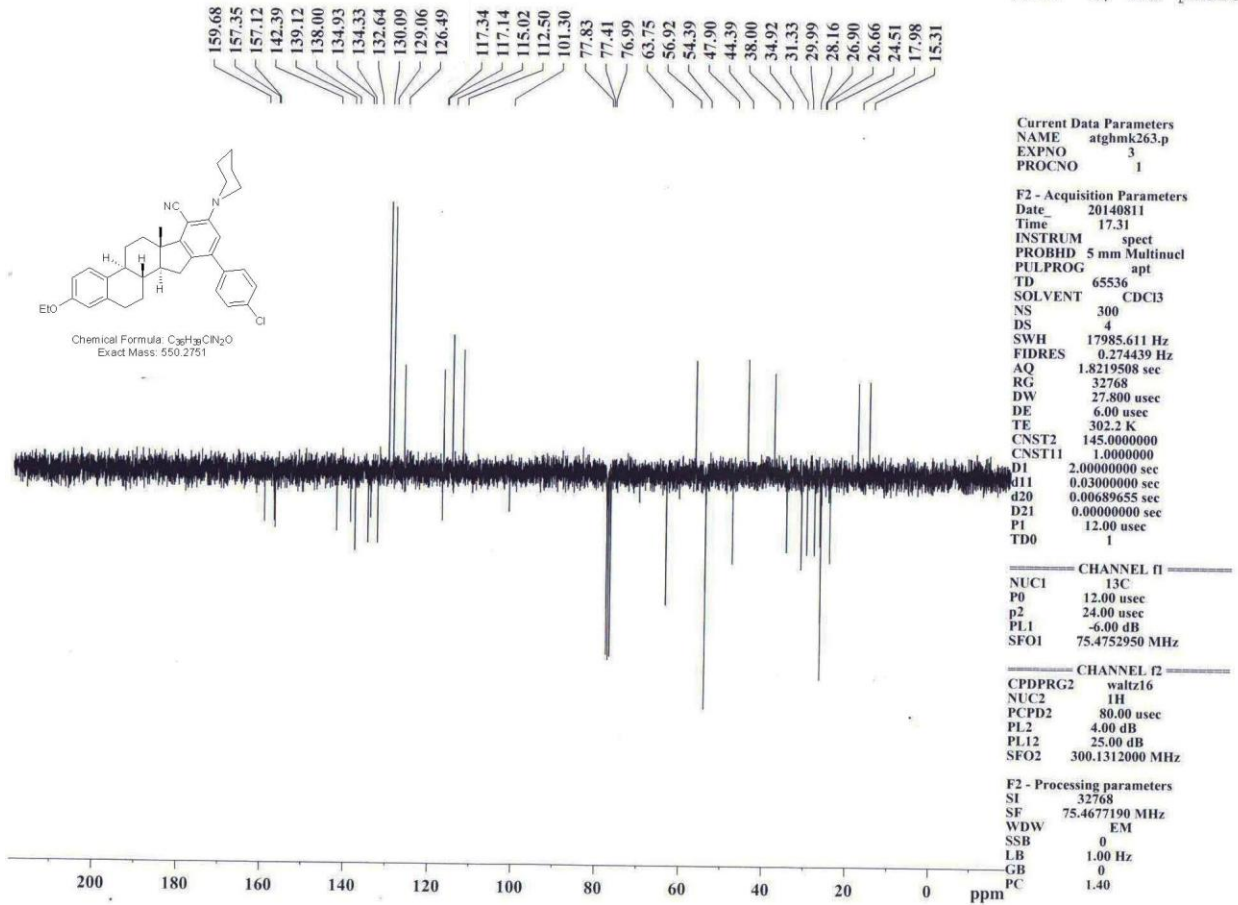

Sample ID: NR-ATG-263  
Acquisition Date: 02/03/15 12:21:13

15103FEB02 #23-55 RT: 0.30-0.70 AV: 33 SB: 2 0.01, 0.01 NL: 4.05E6  
T: +c ESI Full ms [ 100.00-750.00]

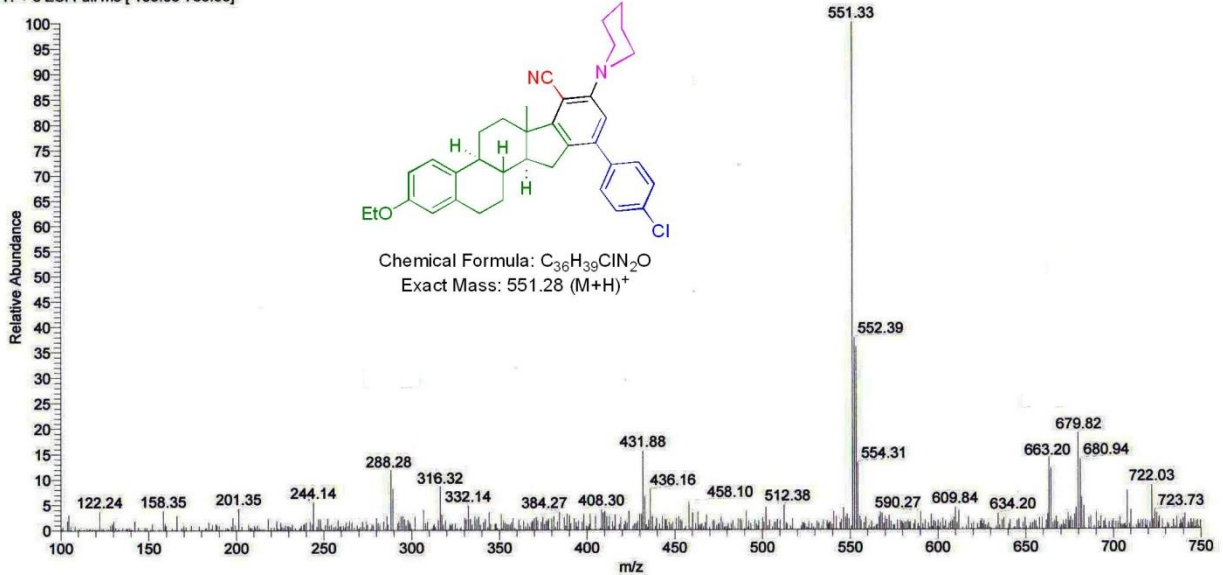

ION TRAP LCQ ADVANTAGE MAX  
THERMO ELECTRON CORPORATION



MCS-7F #4-19 RT: 0.02-0.13 AV: 16 NL: 3.22E6  
T: FTMS (1,1) + p ESI Full ms [150.00-2000.00]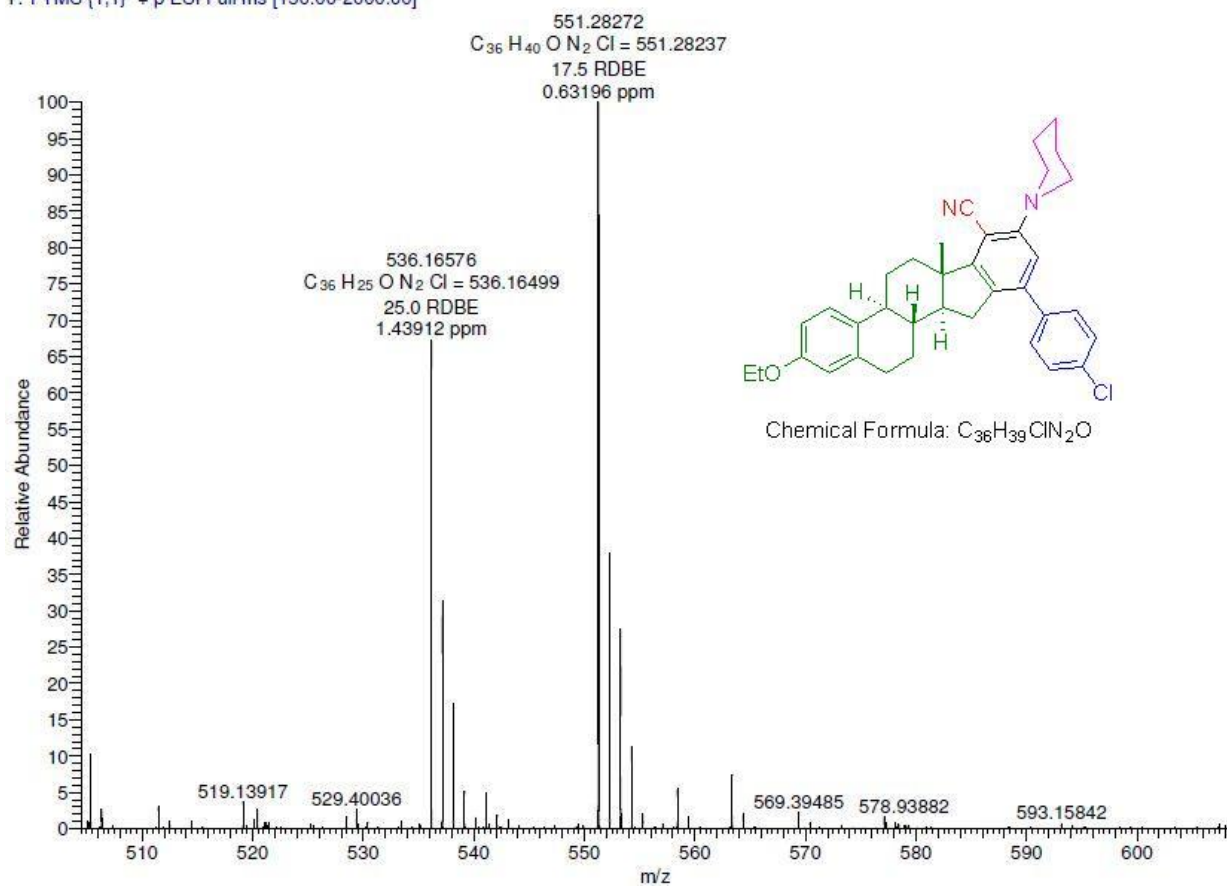

**(+)(6*S*,8*aS*,13*aS*,13*bS*)-12-(4-chlorophenyl)-8*a*-methyl-10-(piperidin-1-yl)-4-(tetrahydrofuran-2-yloxy)-2,6*b*,7,8,8*a*,13, 13*a*,13*b*-octahydro-1*H*-indeno[2,1-*a*]phenanthrene-9-carbonitrile (7g)**

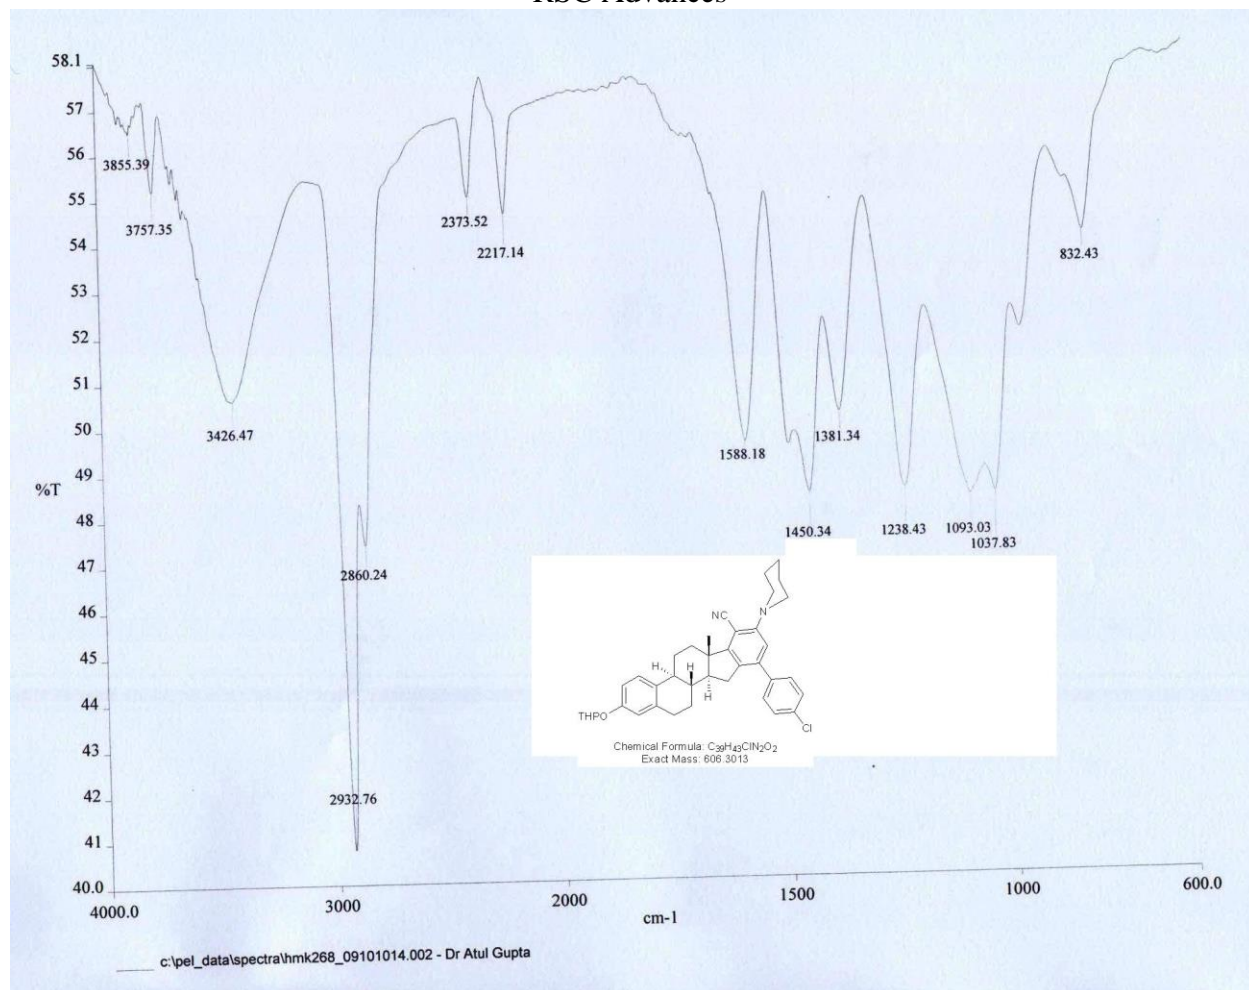

# RSC Advances

7.464  
7.436  
7.389  
7.361  
7.288  
7.262  
7.233  
6.916  
6.909  
6.888  
6.881  
6.812  
5.416  
4.104  
4.141  
3.955  
3.640  
3.215  
3.196  
3.180  
3.161  
3.138  
3.124  
3.104  
3.084  
2.998  
2.958  
2.901  
2.670  
2.662  
2.647  
2.627  
2.358  
2.199  
2.073  
2.040  
2.000  
1.981  
1.925  
1.855  
1.843  
1.825  
1.766  
1.725  
1.683  
1.647  
1.455  
1.313  
1.289  
1.266  
1.187  
0.032

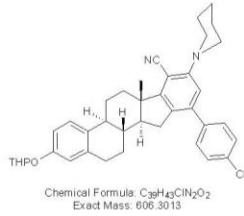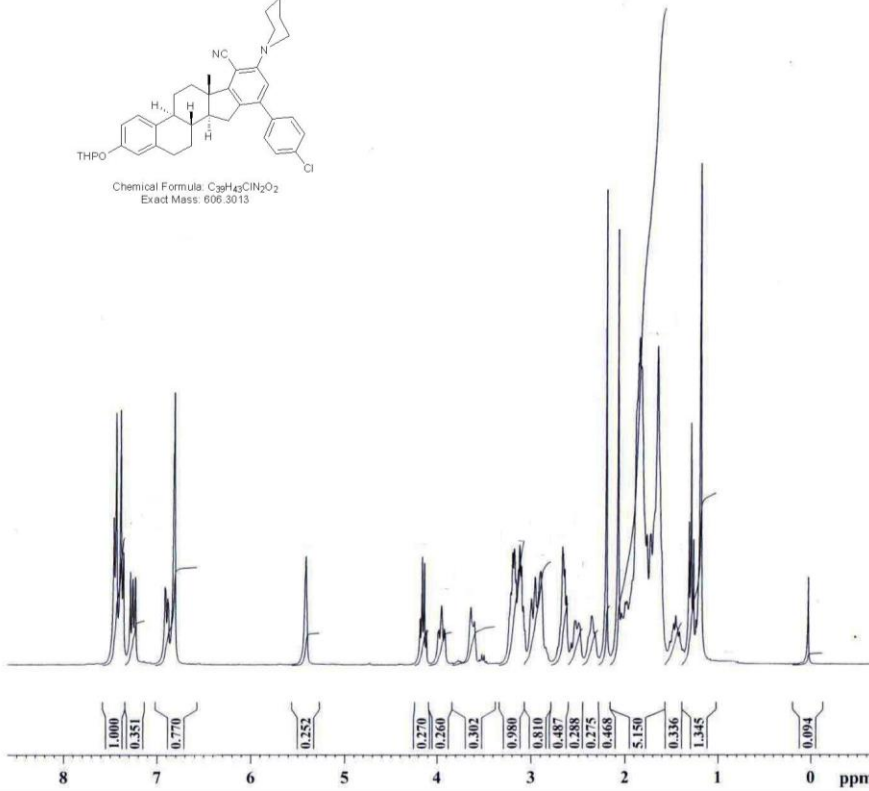

CIMAP PROTON  
PROJECT NO.: mlp-02

**Current Data Parameters**  
NAME atghmk268.p  
EXPNO 1  
PROCNO 1

**F2 - Acquisition Parameters**  
Date 20140821  
Time 13.55  
INSTRUM spect  
PROBHD 5 mm Multinuel  
PULPROG zg30  
TD 65536  
SOLVENT CDCl3  
NS 18  
DS 2  
SWH 8992.806 Hz  
FIDRES 0.137219 Hz  
AQ 3.6438515 sec  
RG 114  
DW 55.600 usec  
DE 6.00 usec  
TE 301.2 K  
D1 1.00000000 sec  
TD0 1

==== CHANNEL f1 =====  
NUC1 1H  
P1 7.15 usec  
PL1 4.00 dB  
SFO1 300.1318534 MHz

**F2 - Processing parameters**  
SI 32768  
SF 300.1299972 MHz  
WDW EM  
SSB 0  
LB 0.30 Hz  
GB 0  
PC 1.40

# RSC Advances

CIMAP-CARBON  
PROJECT NO.: MLP-04

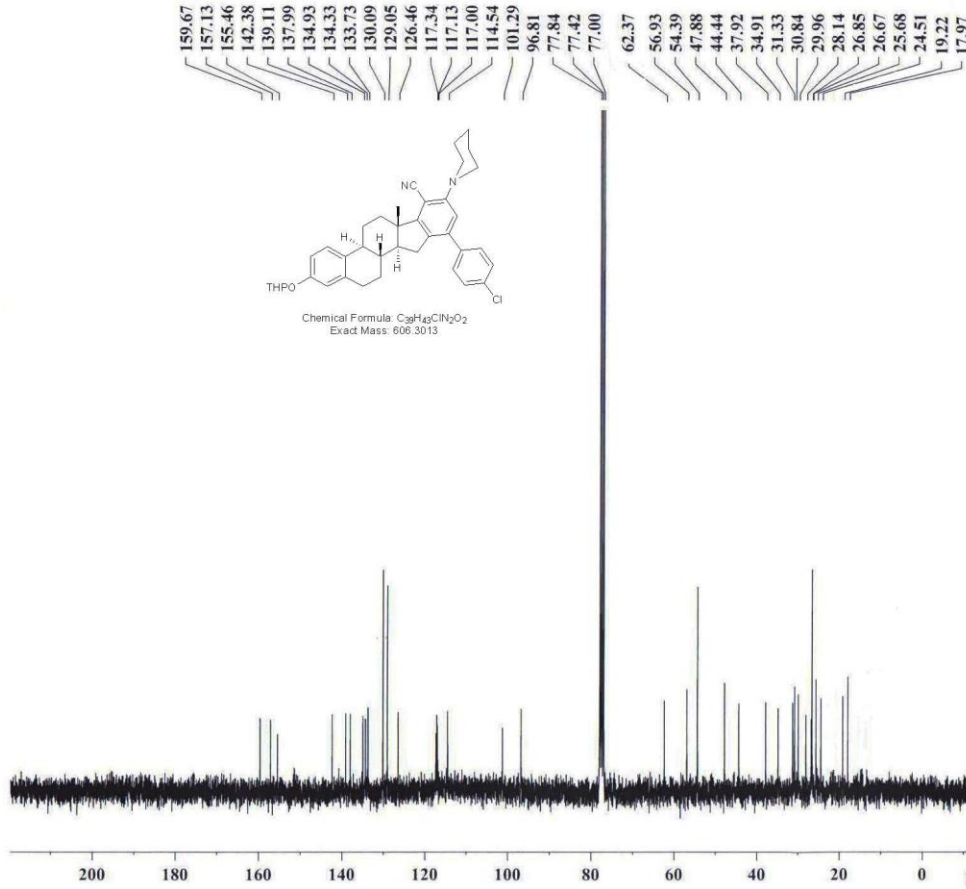

**Current Data Parameters**  
NAME atghmk268.p  
EXPNO 2  
PROCNO 1

**F2 - Acquisition Parameters**  
Date 20140821  
Time 14.16  
INSTRUM spect  
PROBHD 5 mm Multinucl  
PULPROG zgpg30  
TD 65536  
SOLVENT CDCl3  
NS 1006  
DS 4  
SWH 17985.611 Hz  
FIDRES 0.274439 Hz  
AQ 1.8219508 sec  
RG 32768  
DW 27.800 usec  
DE 6.00 usec  
TE 301.9 K  
D1 2.00000000 sec  
d11 0.03000000 sec  
DELTA 1.89999998 sec  
TD0 1

==== CHANNEL f1 =====  
NUC1 13C  
P1 12.00 usec  
PL1 -6.00 dB  
SFO1 75.4752950 MHz

==== CHANNEL f2 =====  
CPDPRG2 waltz16  
NUC2 1H  
PCPD2 80.00 usec  
PL2 4.00 dB  
PL12 25.00 dB  
PL13 29.00 dB  
SFO2 300.1312000 MHz

**F2 - Processing parameters**  
SI 32768  
SF 75.4677190 MHz  
WDW EM  
SSB 0  
LB 1.00 Hz  
GB 0  
PC 1.40

RSC Advances

CIMAP-DEPT 135  
PROJECT NO.: ILP-13

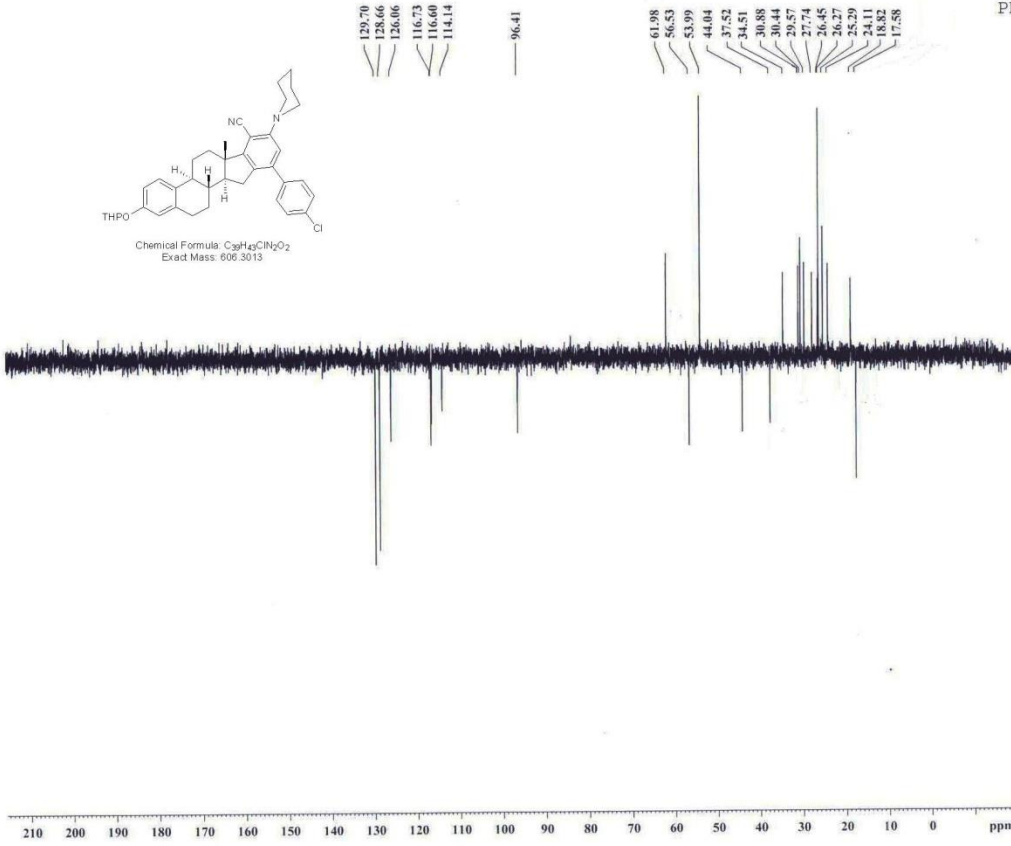

Current Data Parameters  
NAME aghm1268.p  
EXPNO 3  
PROCNO 1

F2 - Acquisition Parameters  
Date\_ 20140821  
Time 15.22  
INSTRUM spect  
PROBHD 5 mm Multinuc  
PULPROG dept135  
TD 65536  
SOLVENT CDC13  
NS 400  
DS 4  
SWH 17985.611 Hz  
FIDRES 0.274439 Hz  
AQ 1.8219508 sec  
RG 16384  
DW 27.800 usec  
DE 6.00 usec  
TE 302.2 K  
CNST2 137.0000000  
D1 2.00000000 sec  
d2 0.00364964 sec  
d12 0.00002000 sec  
DELTA 0.00001528 sec  
TD0 1

CHANNEL f1  
NUC1 13C  
P1 12.00 usec  
p2 24.00 usec  
PL1 -6.00 dB  
SFO1 75.4752953 MHz

CHANNEL f2  
CPDPRG2 waltz64  
NUC2 1H  
P3 7.15 usec  
p4 14.30 usec  
PCPD2 80.00 usec  
PL2 4.00 dB  
PL12 25.00 dB  
SFO2 300.1312065 MHz

F2 - Processing parameters  
SI 32768  
SF 75.4677490 MHz  
WDW EM  
SSB 0  
LB 1.00 Hz  
GB 0  
PC 1.40

Data File: 15123FEB50  
Original Data Path: 15123FEB50.RAW  
Current Data Path: C:\Xcalibur\data\FEB2015\23FEB2015\  
Sample ID: NR-ATG-268  
Acquisition Date: 02/23/15 13:50:23

15123FEB50 #15-34 RT: 0.30-0.70 AV: 20 SB: 2 0.00, 0.00 NL: 3.97E6  
T: + c ESI Full ms [ 150.00-1500.00]

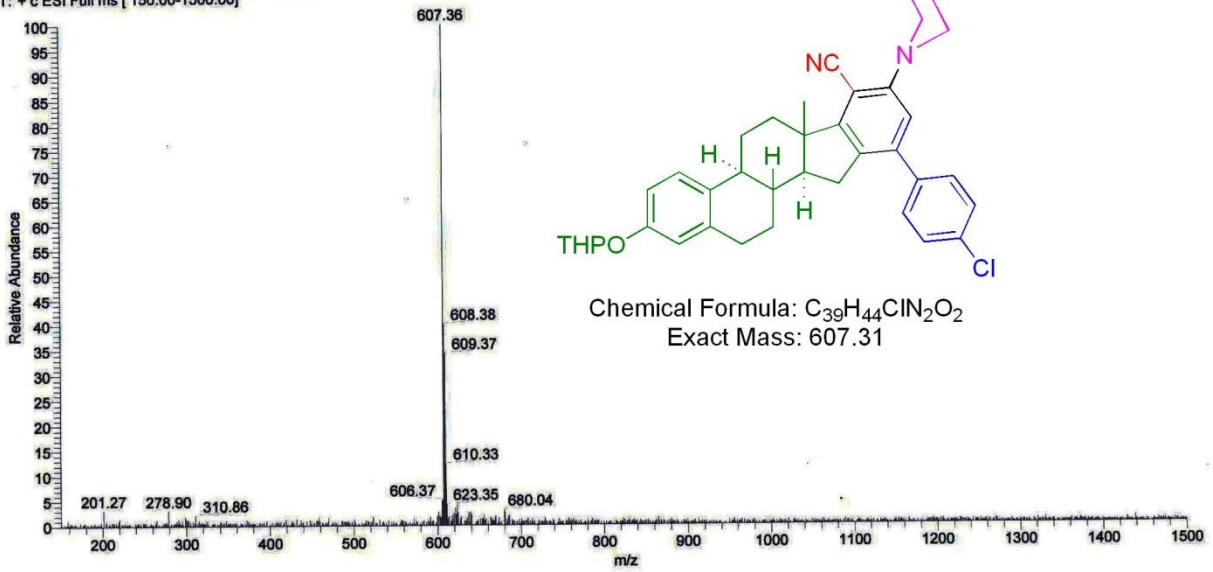

ION TRAP LCQ ADVANTAGE MAX  
THERMO ELECTRON CORPORATION

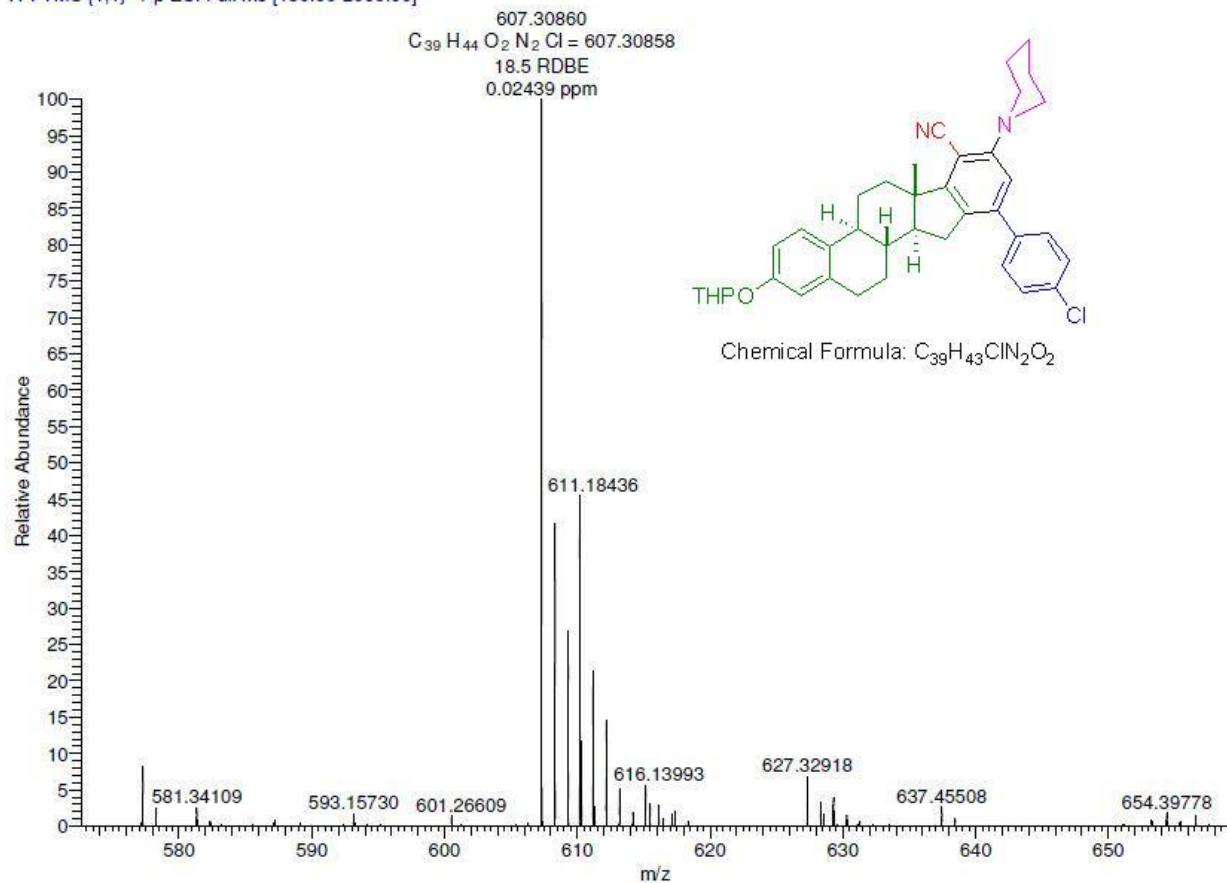

(+)(6bS,8aS,13aS,13bS)-12-(4-chlorophenyl)-4-hydroxy-8a-methyl-10-(piperidin-1-yl)-2,6b,7,8,8a,13,13a,13b-octahydro-1H-indeno[2,1-a]phenanthrene-9-carbonitrile (**7h**)

# RSC Advances

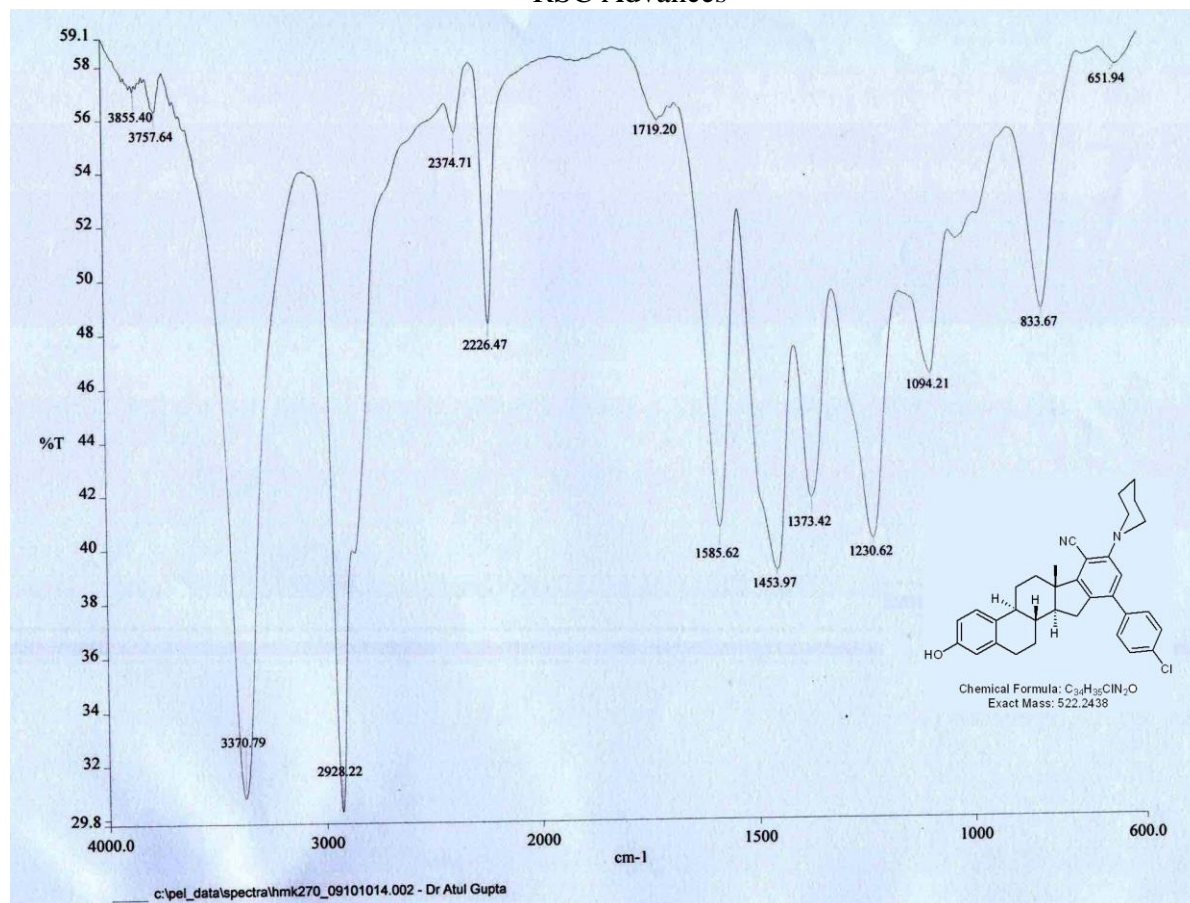

# RSC Advances

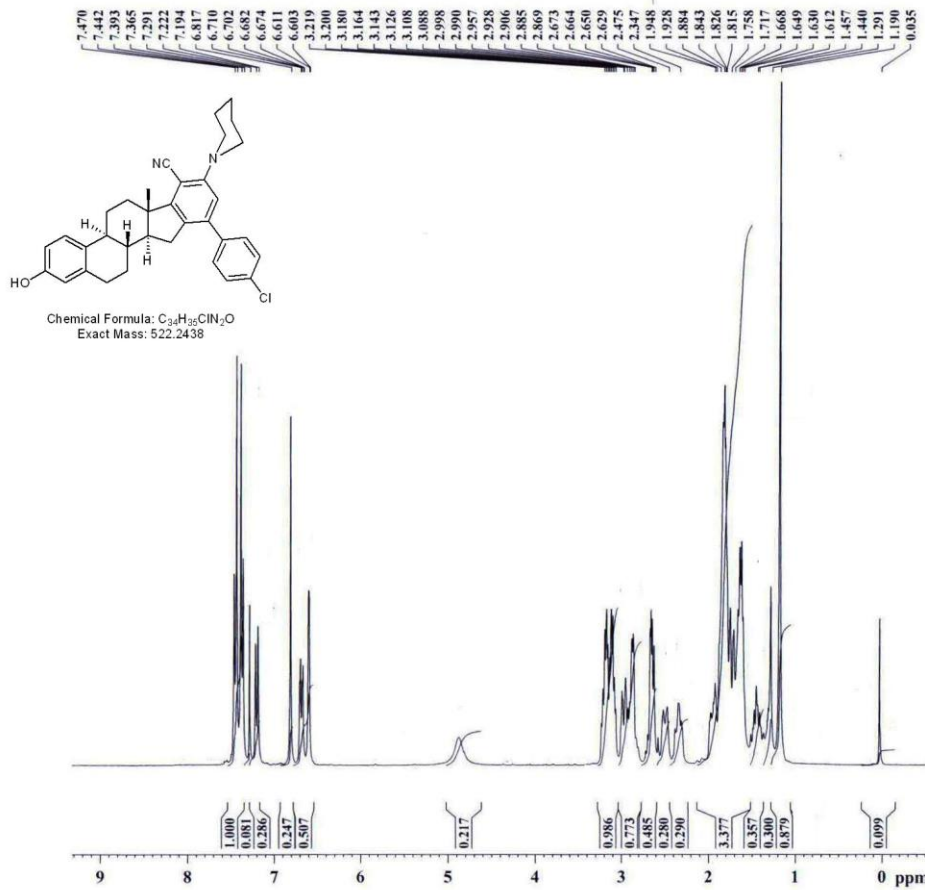

CIMAP PROTON  
PROJECT NO.: mlp-02

Current Data Parameters  
NAME atghmk270.p  
EXPNO 1  
PROCNO 1

F2 - Acquisition Parameters  
Date\_ 20140826  
Time 13.09  
INSTRUM spect  
PROBHD 5 mm Multinucl  
PULPROG zg30  
TD 65536  
SOLVENT CDCl3  
NS 62  
DS 2  
SWH 8992.806 Hz  
FIDRES 0.137219 Hz  
AQ 3.6438515 sec  
RG 181  
DW 55.600 usec  
DE 6.00 usec  
TE 300.7 K  
D1 1.00000000 sec  
TD0 1

CHANNEL f1  
NUC1 1H  
P1 7.15 usec  
PL1 4.00 dB  
SFO1 300.1318534 MHz

F2 - Processing parameters  
SI 32768  
SF 300.1299972 MHz  
WDW EM  
SSB 0  
LB 0.30 Hz  
GB 0  
PC 1.40



RSC Advances

CIMAP-CARBON  
PROJECT NO.: MLP-04

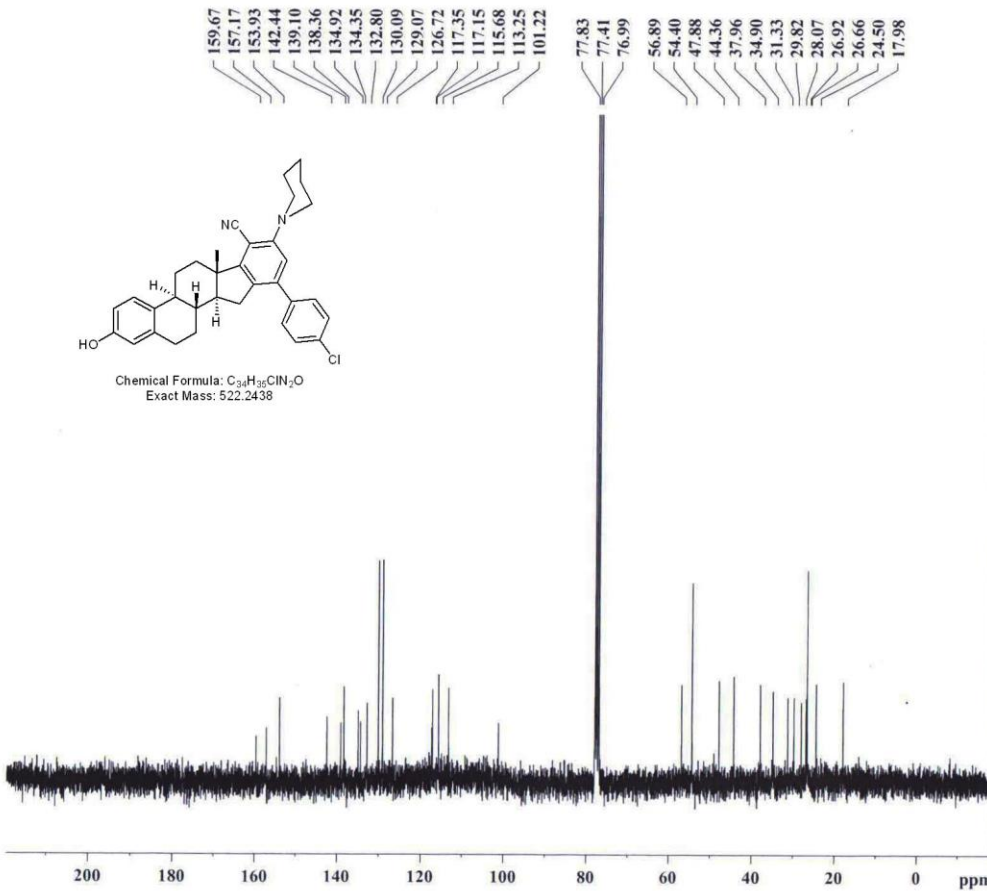

Current Data Parameters  
NAME atghmk270.p  
EXPNO 2  
PROCNO 1

F2 - Acquisition Parameters  
Date 20140903  
Time 11.31  
INSTRUM spect  
PROBHD 5 mm Multinucl  
PULPROG zgpg30  
TD 65536  
SOLVENT CDCl3  
NS 800  
DS 4  
SWH 17985.611 Hz  
FIDRES 0.274439 Hz  
AQ 1.8219508 sec  
RG 32768  
DW 27.800 usec  
DE 6.00 usec  
TE 301.6 K  
D1 2.0000000 sec  
d11 0.0300000 sec  
DELTA 1.89999998 sec  
TD0 1

===== CHANNEL f1 =====  
NUC1 13C  
P1 12.00 usec  
PL1 -6.00 dB  
SFO1 75.4752950 MHz

===== CHANNEL f2 =====  
CPDPRG2 waltz16  
NUC2 1H  
PCPD2 80.00 usec  
PL2 4.00 dB  
PL12 25.00 dB  
PL13 29.00 dB  
SFO2 300.1312000 MHz

F2 - Processing parameters  
SI 32768  
SF 75.4677190 MHz  
WDW EM  
SSB 0  
LB 1.00 Hz  
GB 0  
PC 1.40

RSC Advances

CIMAP-DEPT 135  
PROJECT NO.: ILP-13

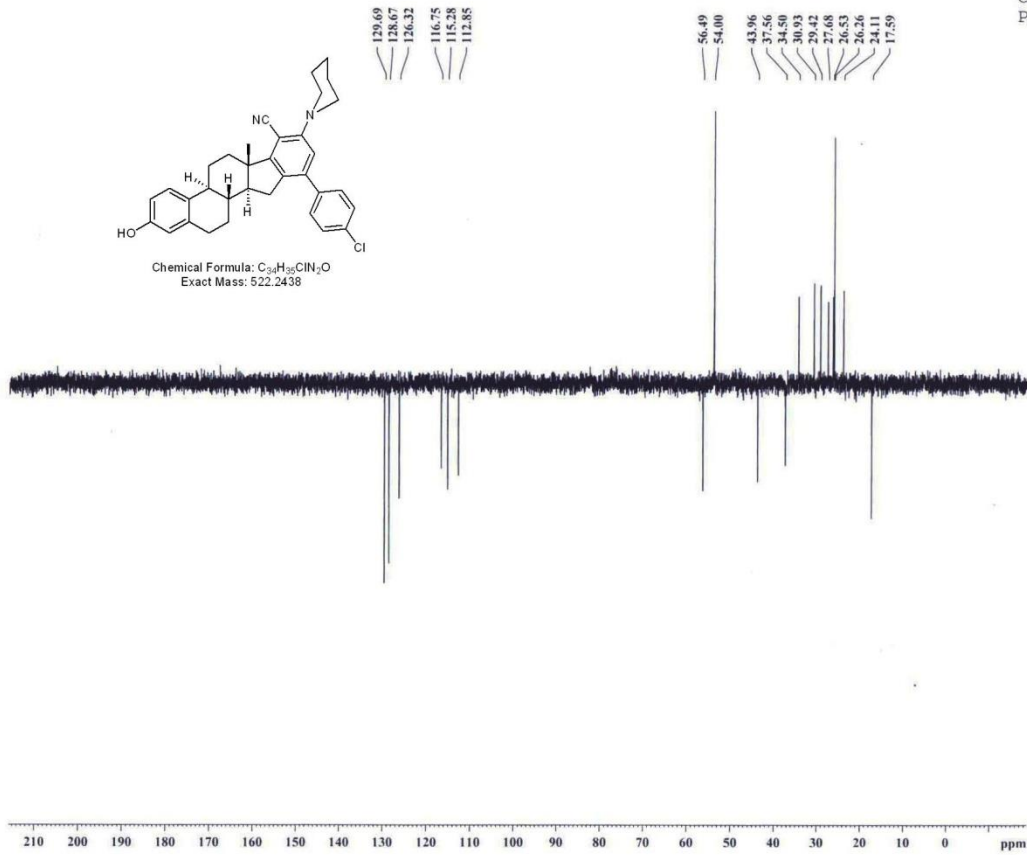

Current Data Parameters  
NAME atgmk270.p  
EXPNO 3  
PROCNO 1

F2 - Acquisition Parameters  
Date\_ 20140903  
Time 11:50  
INSTRUM spect  
PROBHD 5 mm Multinucl  
PULPROG dept135  
TD 65536  
SOLVENT CDC13  
NS 712  
DS 4  
SWH 17985.611 Hz  
FIDRES 0.274439 Hz  
AQ 1.8219508 sec  
RG 16384  
DW 27.800 usec  
DE 6.00 usec  
TE 301.6 K  
CNST2 137.000000  
D1 2.00000000 sec  
d2 0.00364964 sec  
d12 0.00002000 sec  
DELTA 0.00001528 sec  
TDO 1

CHANNEL f1  
NUC1 13C  
P1 12.00 usec  
p2 24.00 usec  
PL1 -6.90 dB  
SFO1 75.4752953 MHz

CHANNEL f2  
CPDPRG2 waltz64  
NUC2 1H  
P3 7.15 usec  
p4 14.30 usec  
PCPD2 80.00 usec  
PL2 4.00 dB  
PL12 25.00 dB  
SFO2 300.1312005 MHz

F2 - Processing parameters  
SI 32768  
SF 75.4677490 MHz  
WDW EM  
SSB 0  
LB 1.00 Hz  
GB 0  
PC 1.40

Sample ID: NR-ATG-270  
Acquisition Date: 02/04/15 14:01:35

151O4FEB53 #15-35 RT: 0.30-0.70 AV: 21 SB: 2 0.01, 0.01 NL: 2.28E7  
T: + c ESI Full ms [ 150.00-1500.00]

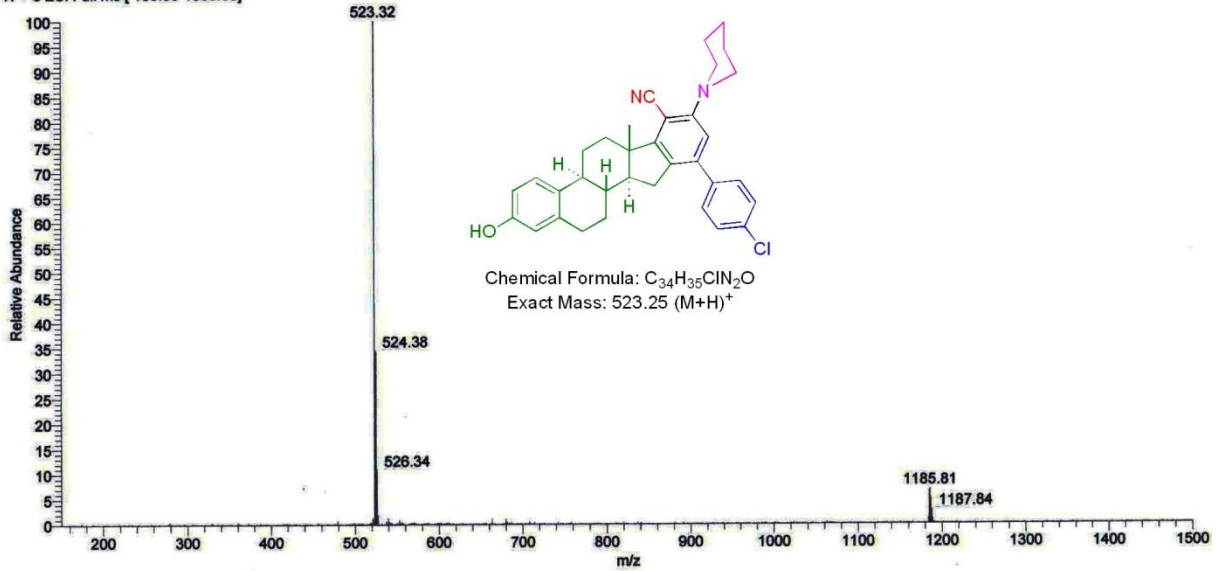

ION TRAP LCQ ADVANTAGE MAX  
THERMO ELECTRON CORPORATION

MCS-7H #4-19 RT: 0.02-0.13 AV: 16 NL: 4.36E6

T: FTMS (1,1) + p ESI Full ms [150.00-2000.00]

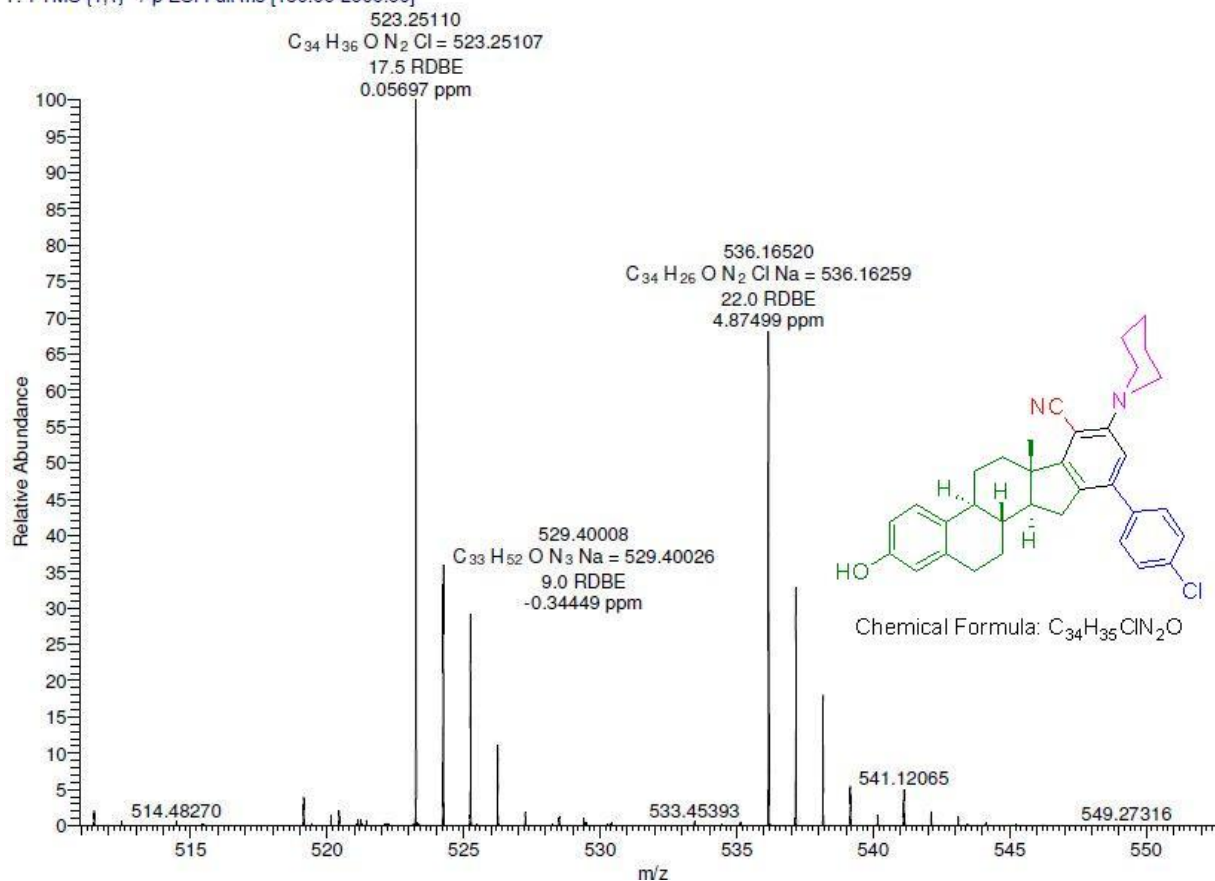

(+)(6bS,8aS,13aS,13bS)-4-ethoxy-8a-methyl-10-morpholino-12-p-tolyl-2,6b,7,8,8a,13,13a,13b-octahydro-1H-indeno[2,1-a]phenanthrene-9-carbonitrile (7i)

# RSC Advances

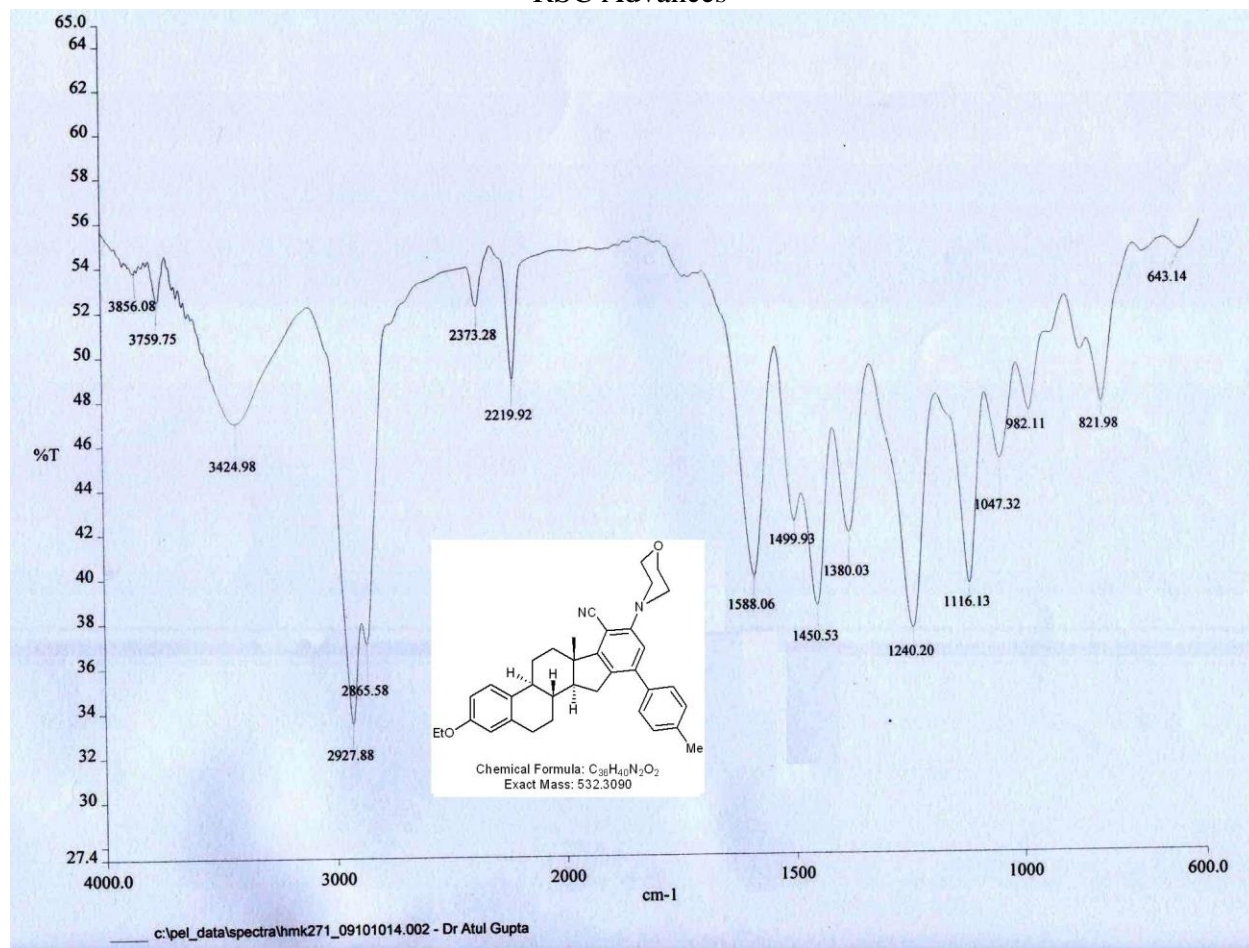

# RSC Advances

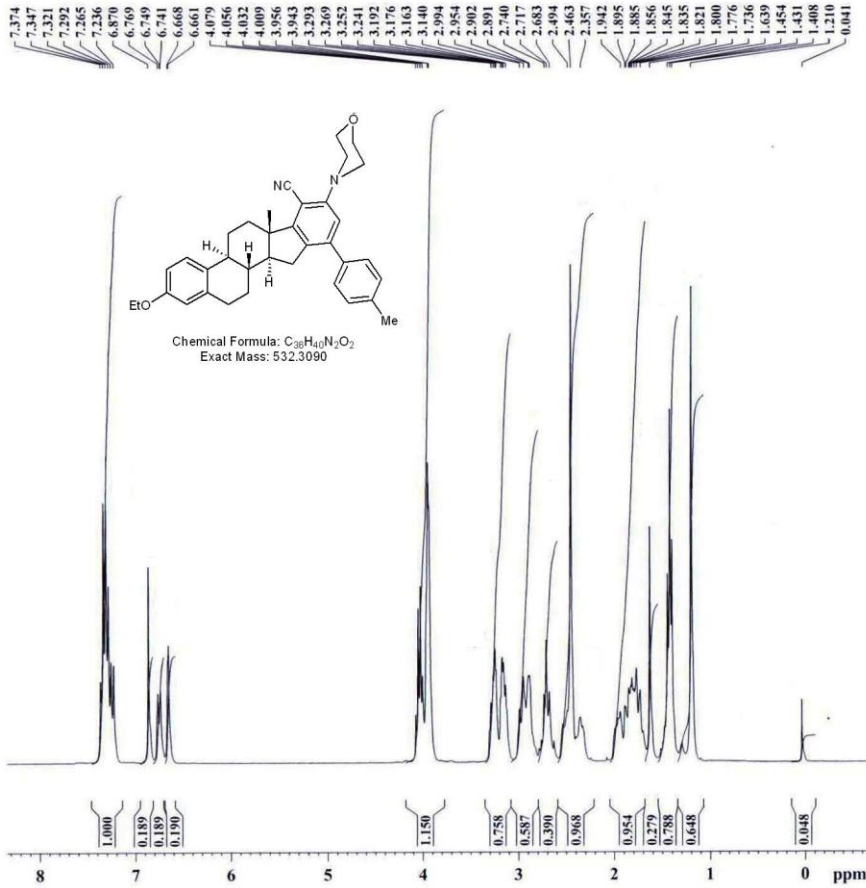

CIMAP PROTON  
PROJECT NO.: mlp-02

Current Data Parameters  
NAME atghmk271.p  
EXPNO 1  
PROCNO 1

F2 - Acquisition Parameters  
Date 20140826  
Time 13.01  
INSTRUM spect  
PROBHD 5 mm Multinucl  
PULPROG zg30  
TD 65536  
SOLVENT CDCl3  
NS 26  
DS 2  
SWH 8992.806 Hz  
FIDRES 0.137219 Hz  
AQ 3.6438515 sec  
RG 181  
DW 55.600 usec  
DE 6.00 usec  
TE 300.9 K  
D1 1.00000000 sec  
TD0 1

CHANNEL f1  
NUC1 1H  
P1 7.15 usec  
PL1 4.00 dB  
SFO1 300.1318534 MHz

F2 - Processing parameters  
SI 32768  
SF 300.1299972 MHz  
WDW EM  
SSB 0  
LB 0.30 Hz  
GB 0  
PC 1.40

# RSC Advances

CIMAP-CARBON  
PROJECT NO.:MLP-04

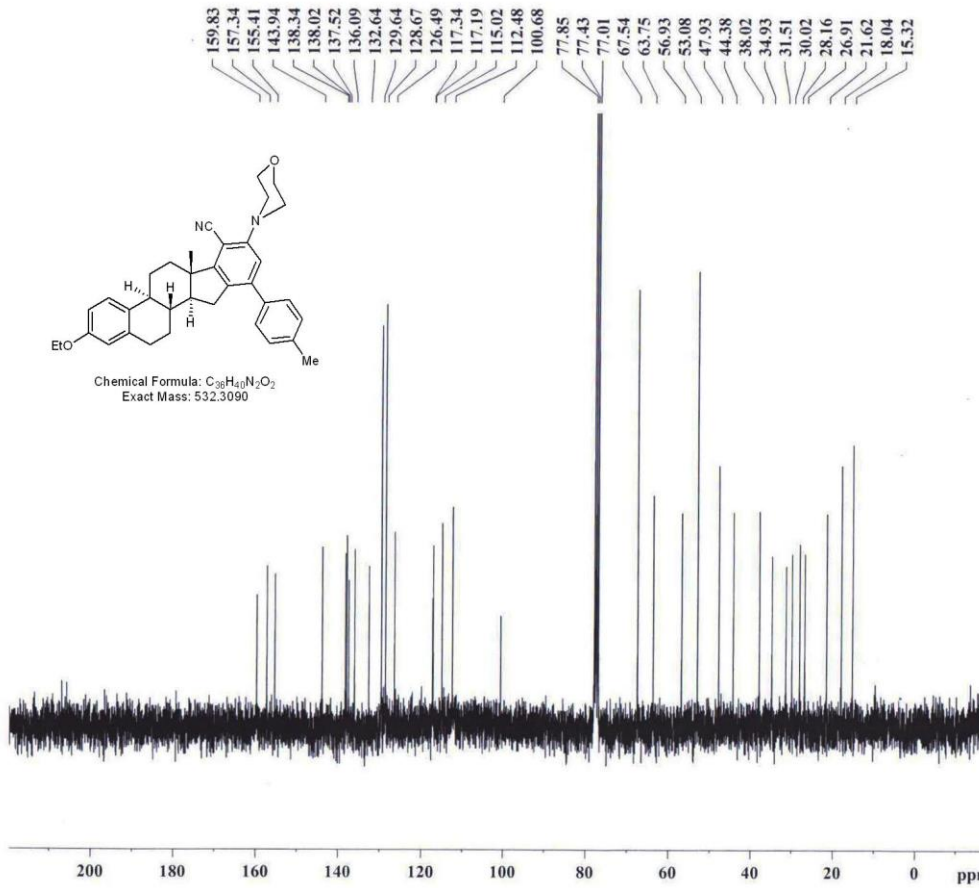

Current Data Parameters  
NAME atghmk271.p  
EXPNO 2  
PROCNO 1

F2 - Acquisition Parameters  
Date\_ 20140903  
Time 10.24  
INSTRUM spect  
PROBHD 5 mm Multinuel  
PULPROG zgpg30  
TD 65536  
SOLVENT CDCl3  
NS 512  
DS 4  
SWH 17985.611 Hz  
FIDRES 0.274439 Hz  
AQ 1.8219508 sec  
RG 32768  
DW 27.800 usec  
DE 6.00 usec  
TE 301.0 K  
D1 2.00000000 sec  
d11 0.03000000 sec  
DELTA 1.89999998 sec  
TD0 1

==== CHANNEL f1 =====  
NUC1 13C  
P1 12.00 usec  
PL1 -6.00 dB  
SFO1 75.4752950 MHz

==== CHANNEL f2 =====  
CPDPRG2 waltz16  
NUC2 1H  
PCPD2 80.00 usec  
PL2 4.00 dB  
PL12 25.00 dB  
PL13 29.00 dB  
SFO2 300.1312000 MHz

F2 - Processing parameters  
SI 32768  
SF 75.4677190 MHz  
WDW EM  
SSB 0  
LB 1.00 Hz  
GB 0  
PC 1.40

RSC Advances

CIMAP-DEPT 135  
PROJECT NO. : ILP-13

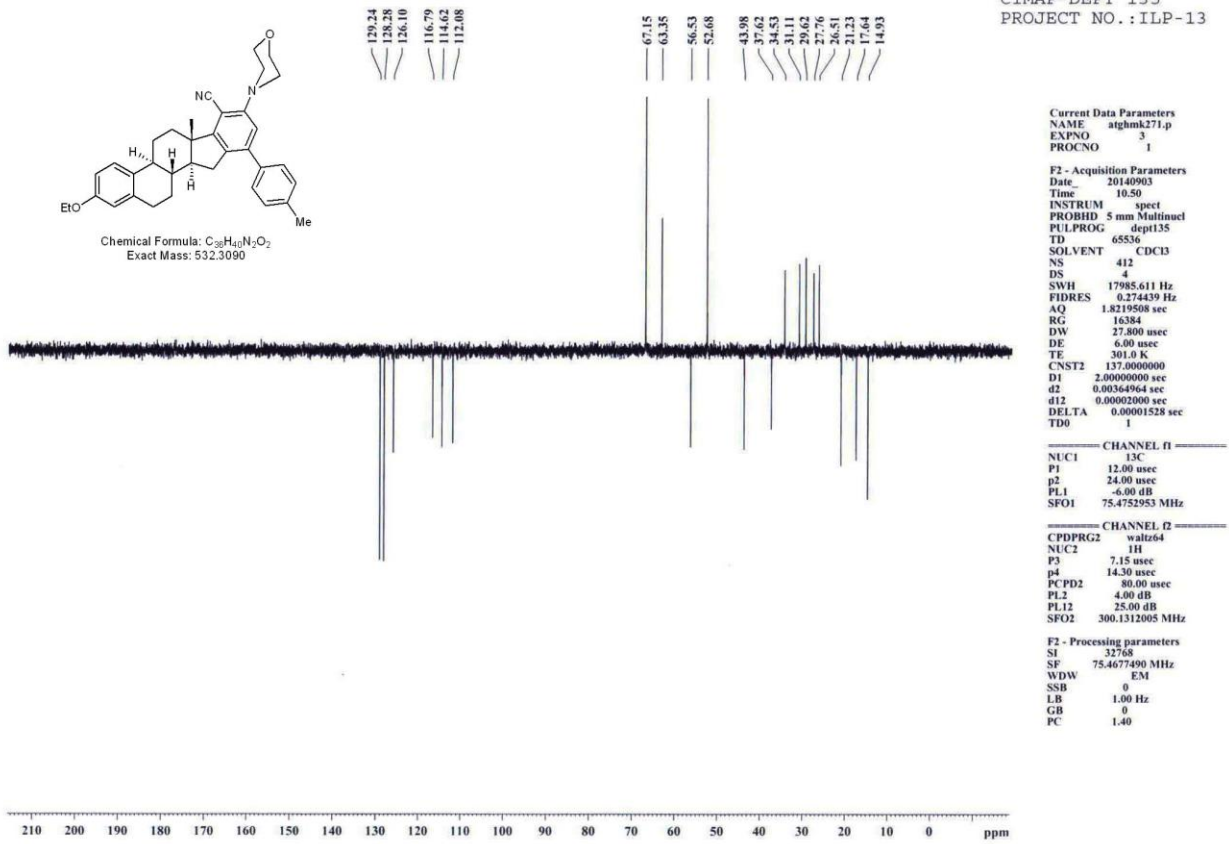

Sample ID: NR-ATG-271  
Acquisition Date: 02/04/15 13:59:33

15I04FEB52 #15-35 RT: 0.30-0.70 AV: 21 SB: 2 0.01, 0.01 NL: 2.84E7  
T: + c ESI Full ms [ 150.00-1500.00]

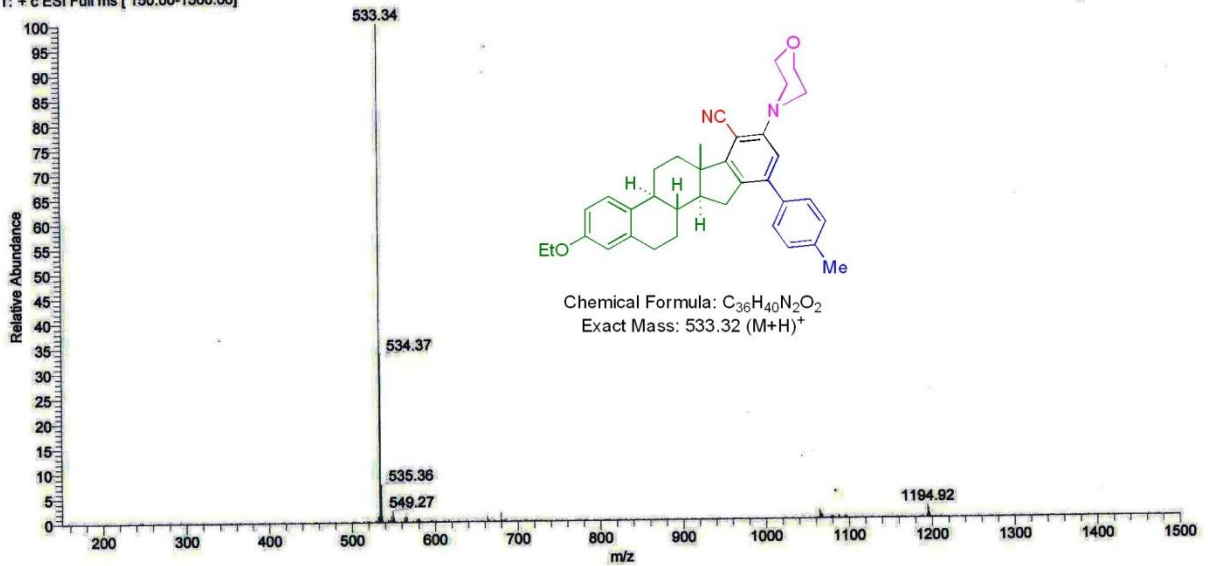

ION TRAP LCQ ADVANTAGE MAX  
THERMO ELECTRON CORPORATION

MCS-71 #4-20 RT: 0.02-0.14 AV: 17 NL: 7.75E6  
T: FTMS {1,1} + p ESI Full ms [150.00-2000.00]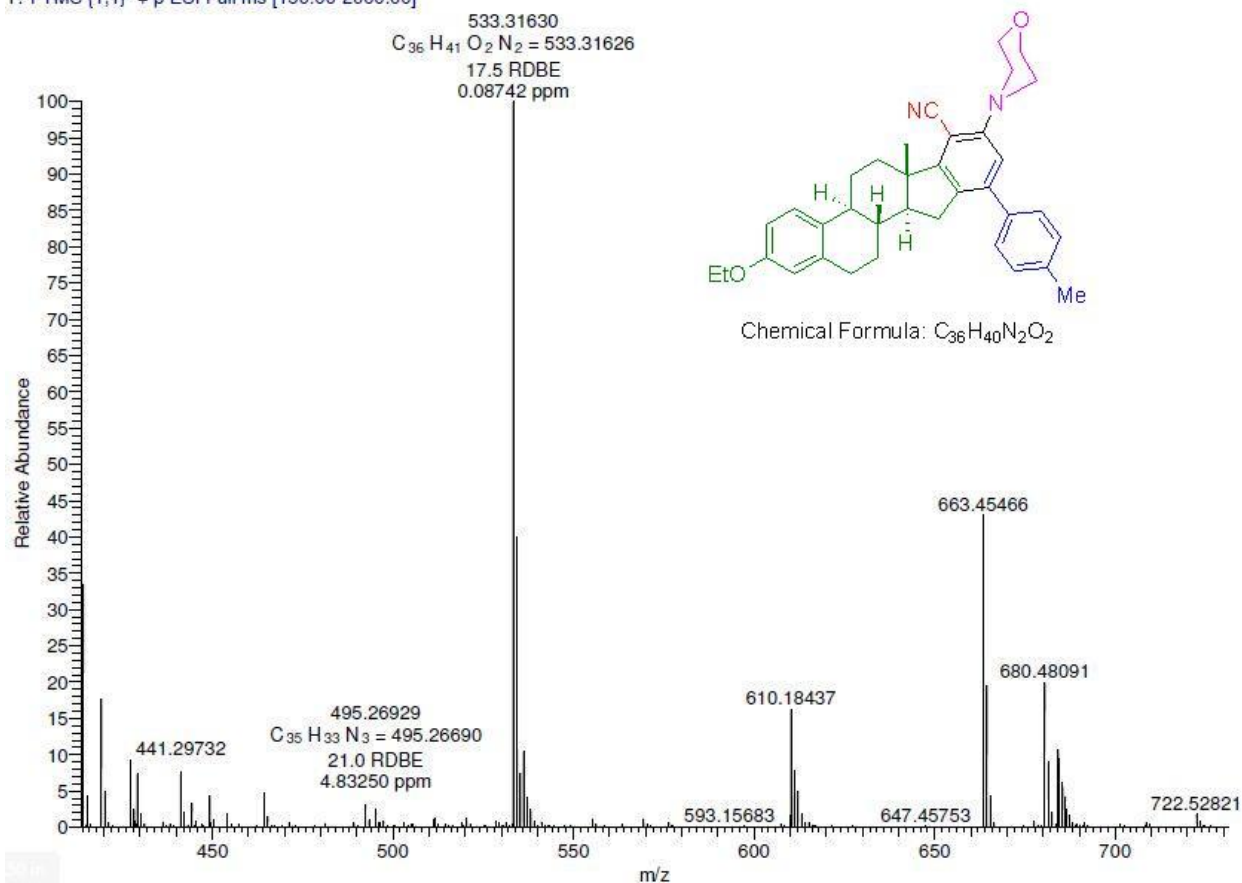

(+)(6bS,8aS,17aS,17bS)-4-ethoxy-8a-methyl-10-(piperidin-1-yl)-1,2,6b,7,8,8b,11,12,17a,17-decahydro-17H-cyclopenta[*a*:c]bisphenanthrene-9-carbonitrile (**12a**)



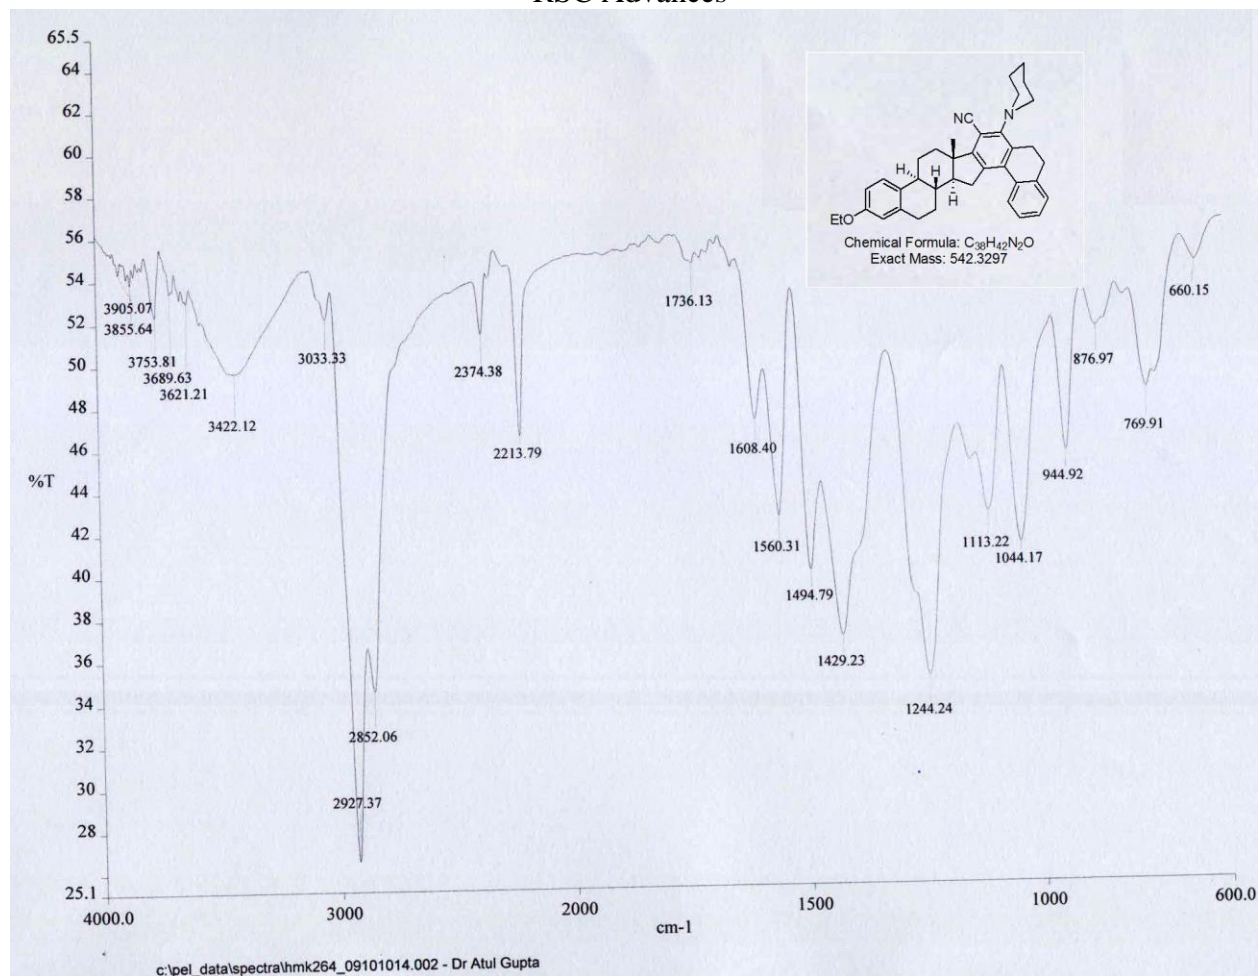

# RSC Advances

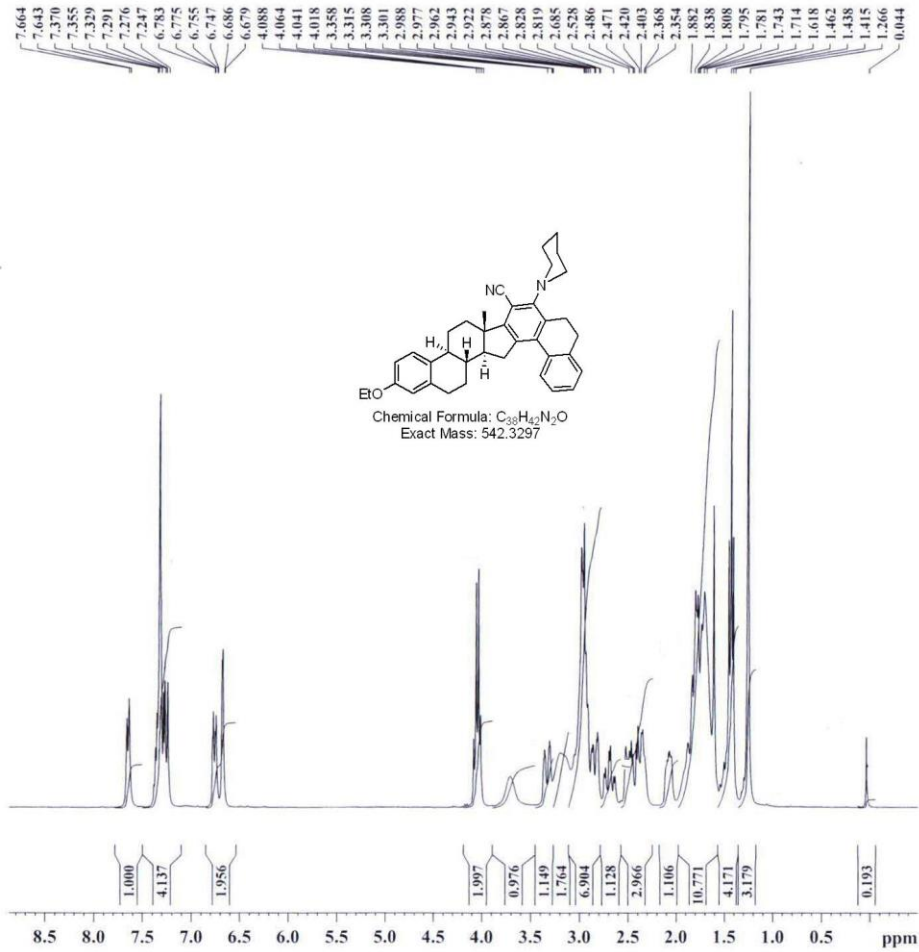

CIMAP PROTON  
PROJECT NO.: mlp-02

**Current Data Parameters**  
NAME atghmk264.p  
EXPNO 1  
PROCNO 1

**F2 - Acquisition Parameters**  
Date\_ 20140826  
Time 13.14  
INSTRUM spect  
PROBHD 5 mm Multinucl  
PULPROG zg30  
TD 65536  
SOLVENT CDCl3  
NS 16  
DS 2  
SWH 8992.806 Hz  
FIDRES 0.137219 Hz  
AQ 3.6438515 sec  
RG 181  
DW 55.600 usec  
DE 6.00 usec  
TE 300.5 K  
D1 1.00000000 sec  
TD0 1

===== CHANNEL f1 =====  
NUC1 1H  
P1 7.15 usec  
PL1 4.00 dB  
SFO1 300.1318534 MHz

**F2 - Processing parameters**  
SI 32768  
SF 300.1299972 MHz  
WDW EM  
SSB 0  
LB 0.30 Hz  
GB 0  
PC 1.40

# RSC Advances

CIMAP-CARBON  
PROJECT NO.: MLP-04

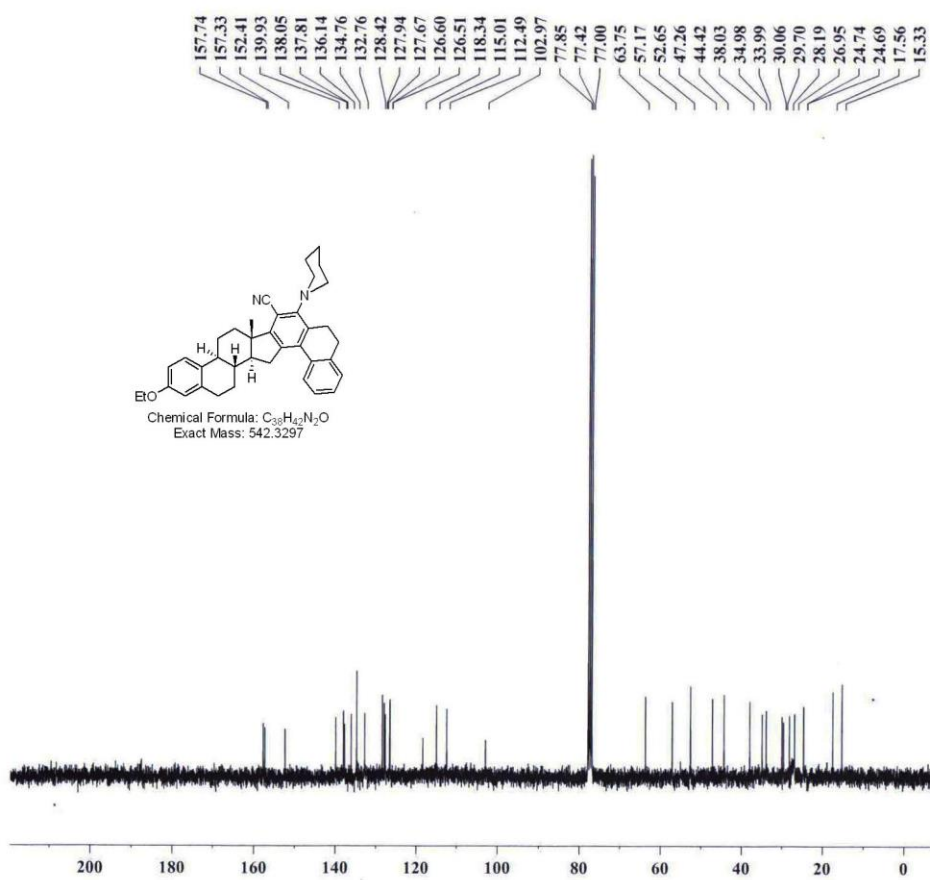

Current Data Parameters  
 NAME atghmk264.p  
 EXPNO 2  
 PROCNO 1

F2 - Acquisition Parameters  
 Date 20140915  
 Time 16.05  
 INSTRUM spect  
 PROBHD 5 mm Multinuc  
 PULPROG zgpg30  
 TD 65536  
 SOLVENT CDCl3  
 NS 655  
 DS 4  
 SWH 17985.611 Hz  
 FIDRES 0.274439 Hz  
 AQ 1.8219508 sec  
 RG 32768  
 DW 27.800 usec  
 DE 6.00 usec  
 TE 300.9 K  
 D1 2.0000000 sec  
 d11 0.0300000 sec  
 DELTA 1.89999998 sec  
 TD0 1

===== CHANNEL f1 =====  
 NUC1 13C  
 P1 12.00 usec  
 PL1 -6.00 dB  
 SFO1 75.4752950 MHz

===== CHANNEL f2 =====  
 CPDPRG2 waltz16  
 NUC2 1H  
 PCPD2 80.00 usec  
 PL2 4.00 dB  
 PL12 25.00 dB  
 PL13 29.00 dB  
 SFO2 300.1312000 MHz

F2 - Processing parameters  
 SI 32768  
 SF 75.4677190 MHz  
 WDW EM  
 SSB 0  
 LB 1.00 Hz  
 GB 0  
 PC 1.40

RSC Advances

CIMAP-DEPT 135  
PROJECT NO. : ILP-13

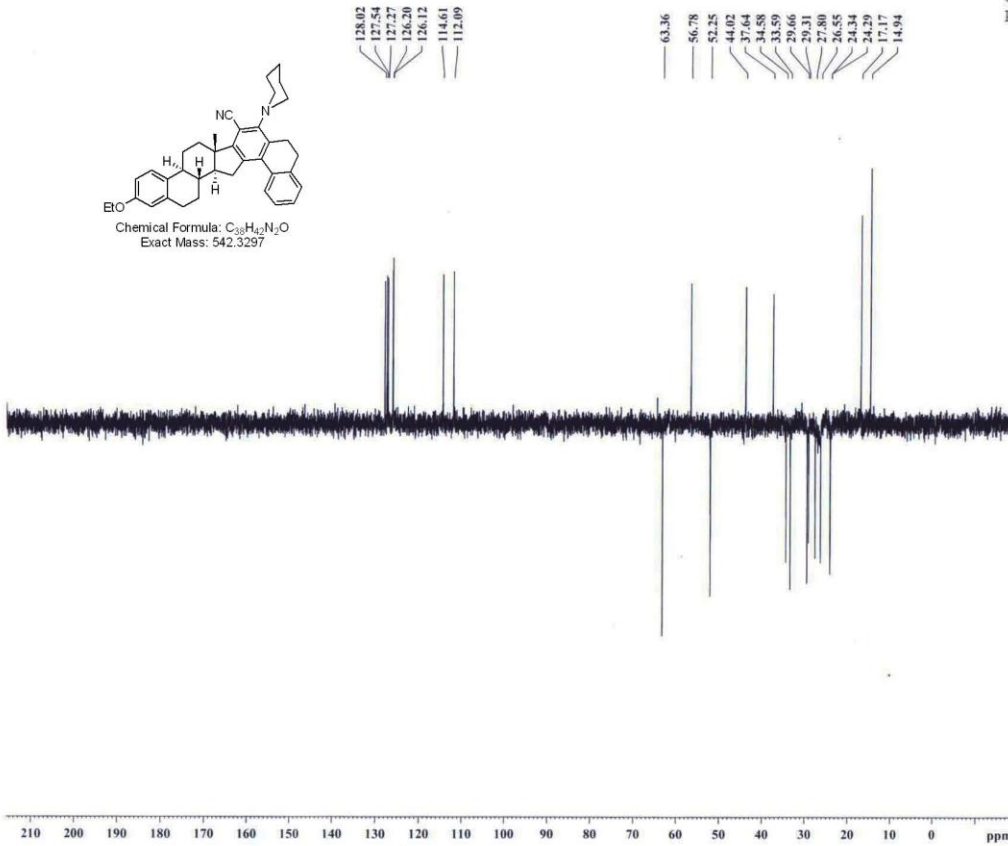

Current Data Parameters  
NAME atghmk264.p  
EXPNO 3  
PROCNO 1

F2 - Acquisition Parameters  
Date\_ 20140915  
Time 16.16  
INSTRUM spect  
PROBHD 5 mm Multinucl  
PULPROG dept135  
TD 65536  
SOLVENT CDCl3  
NS 540  
DS 4  
SWH 17985.611 Hz  
FIDRES 0.274439 Hz  
AQ 1.8219508 sec  
RG 16384  
DW 27.800 usec  
DE 6.00 usec  
TE 300.9 K  
CNST2 137.0000000  
D1 2.0000000 sec  
d2 0.00364964 sec  
d12 0.00002000 sec  
DELTA 0.00001528 sec  
TD0

CHANNEL f1  
NUC1 13C  
P1 12.00 usec  
p2 24.00 usec  
PL1 -4.00 dB  
SFO1 75.4752953 MHz

CHANNEL f2  
CPDPRG2 waltz164  
NUC2 1H  
P3 7.15 usec  
p4 14.30 usec  
PCPD2 80.00 usec  
PL2 4.00 dB  
PL12 25.00 dB  
SFO2 300.1312005 MHz

F2 - Processing parameters  
SI 32768  
SF 75.4677490 MHz  
WDW EM  
SSB 0  
LB 1.00 Hz  
GB 0  
PC 1.40

SAIF, CSIR-CDRI, Lucknow

Data File: 15124FEB58  
Original Data Path: 15124FEB58.RAW  
Current Data Path: C:\Xcalibur\data\FEB2015\24FEB2015\  
Sample ID: NR-ATK-264  
Acquisition Date: 02/24/15 13:59:59

15124FEB58 #15-35 RT: 0.30-0.71 AV: 21 SB: 2 0.00, 0.00 NL: 5.81E6  
T: + c ESI Full ms [ 150.00-1500.00]

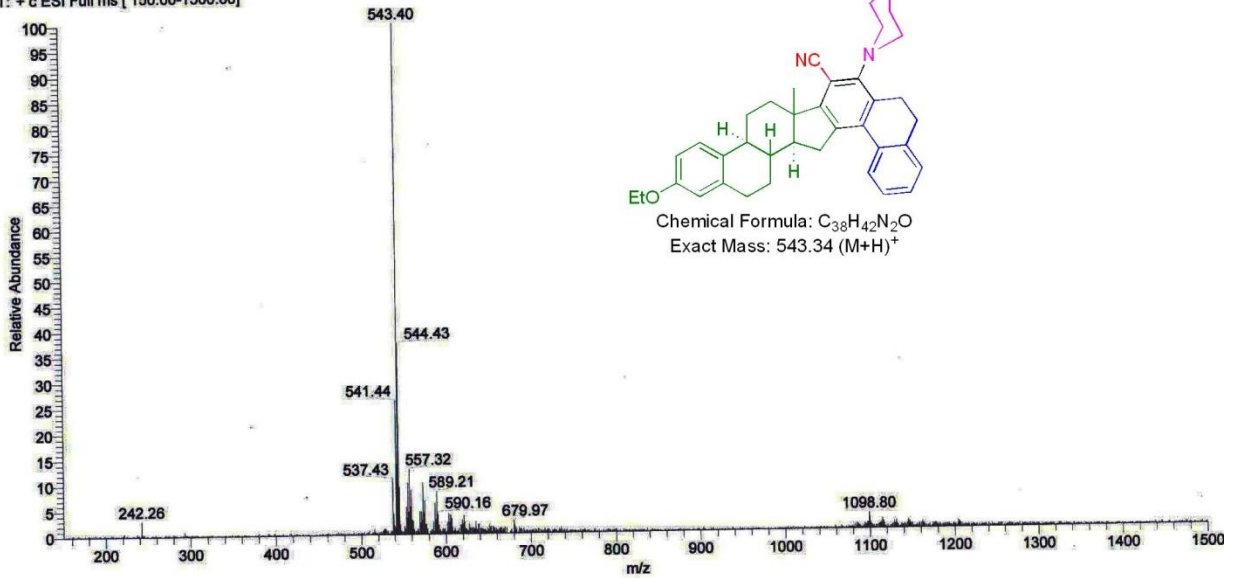

ION TRAP LCQ ADVANTAGE MAX  
THERMO ELECTRON CORPORATION

MCS-12A #4-19 RT: 0.02-0.14 AV: 16 NL: 1.71E6  
T: FTMS (1,1) + p ESI Full ms [150.00-2000.00]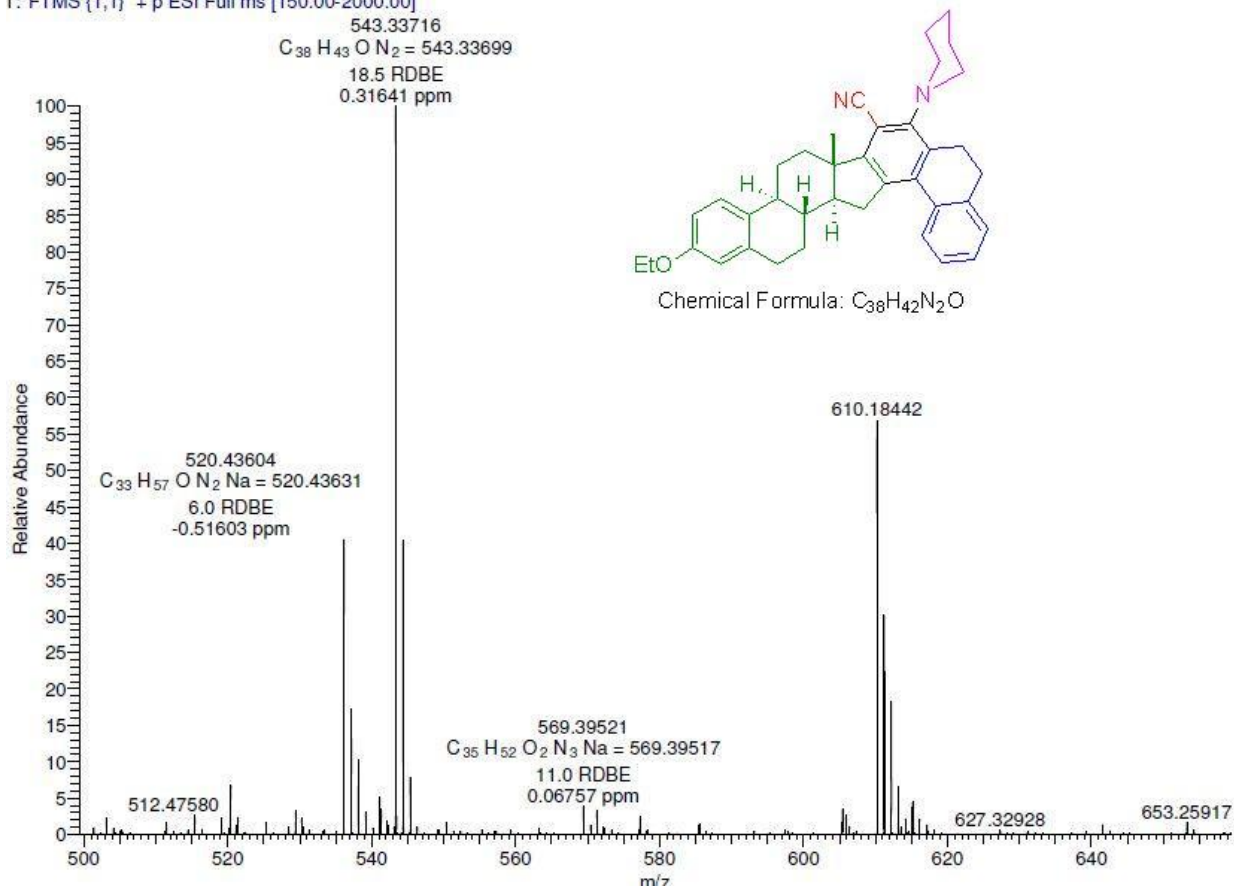

(+)(6bS,8aS,17aS,17bS)-4-(tetrahydro-2H-pyranoxo)-8a-methyl-10-(piperidin-1-yl)-1,2,6b,7,8,8b,11,12,17a,17-decahydro-17H-cyclopenta[a:c]bisphenanthrene-9-carbonitrile (**12b**)

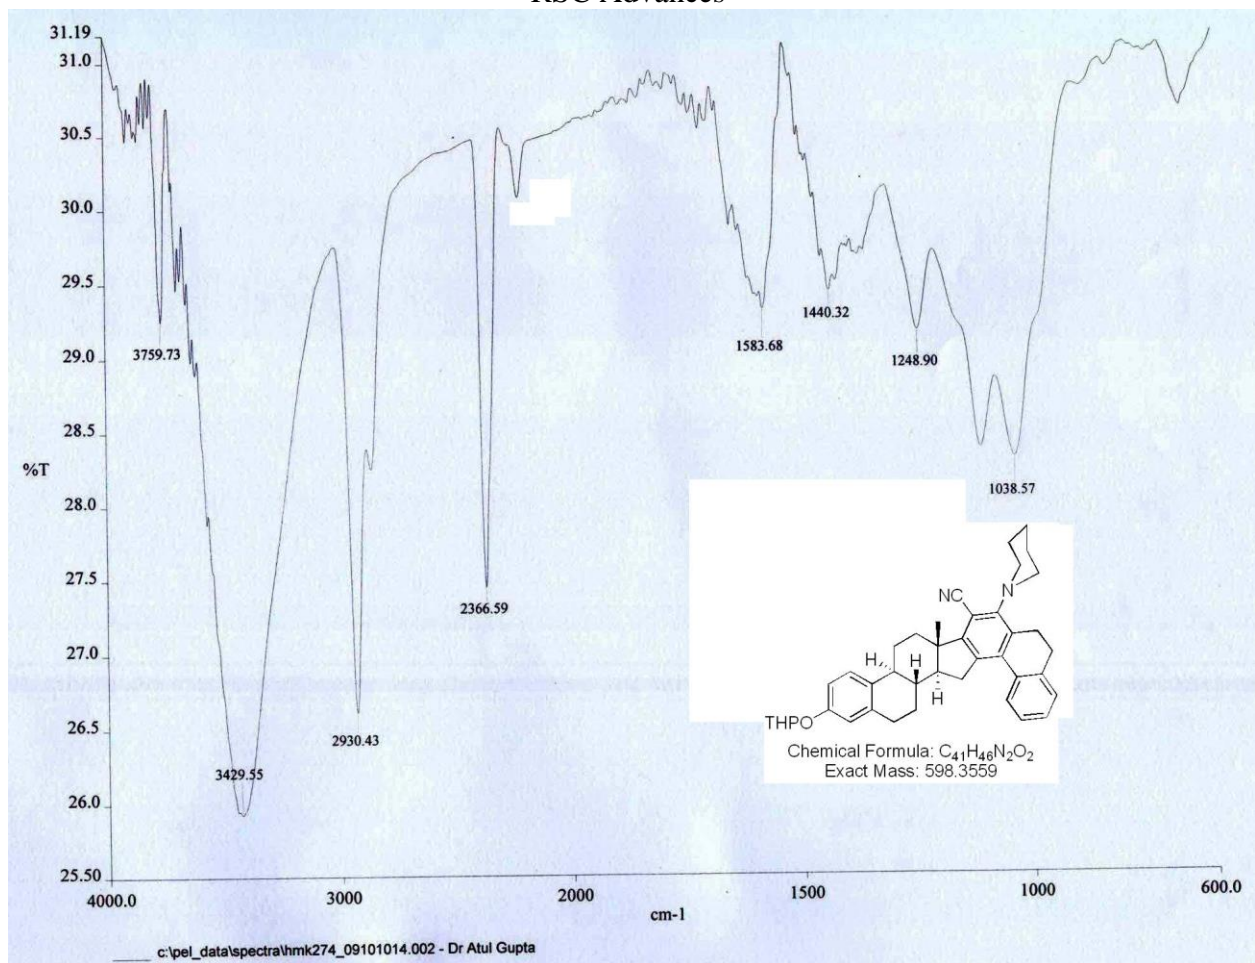

RSC Advances

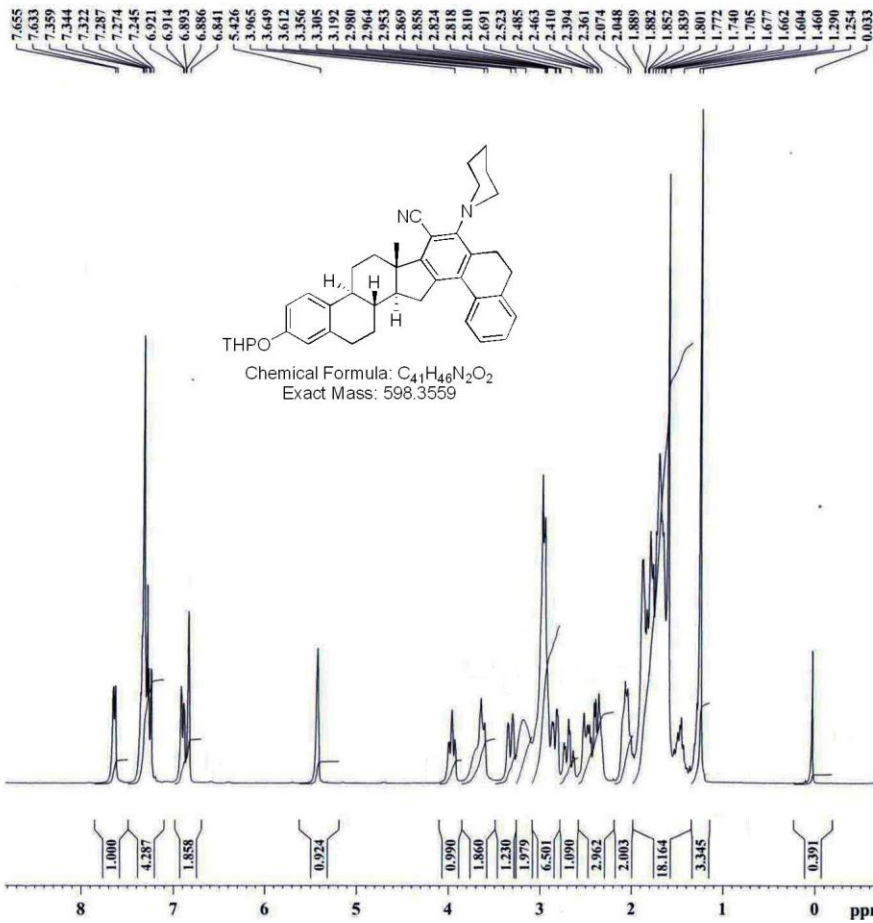

CIMAP PROTON  
PROJECT NO.: mlp-02

Current Data Parameters  
NAME atghmk274.p  
EXPNO 1  
PROCNO 1

F2 - Acquisition Parameters  
Date 20140903  
Time 12.46  
INSTRUM spect  
PROBHD 5 mm Multinucl  
PULPROG zg30  
TD 65536  
SOLVENT CDCl3  
NS 32  
DS 2  
SWH 8992.806 Hz  
FIDRES 0.137219 Hz  
AQ 3.6438515 sec  
RG 256  
DW 55.600 usec  
DE 6.00 usec  
TE 301.7 K  
D1 1.00000000 sec  
TD0 1

CHANNEL f1  
NUC1 1H  
P1 7.15 usec  
PL1 4.00 dB  
SFO1 300.1318534 MHz

F2 - Processing parameters  
SI 32768  
SF 300.1299972 MHz  
WDW EM  
SSB 0  
LB 0.30 Hz  
GB 0  
PC 1.40

RSC Advances

CIMAP-CARBON  
PROJECT NO.: MLP-04

*on line*

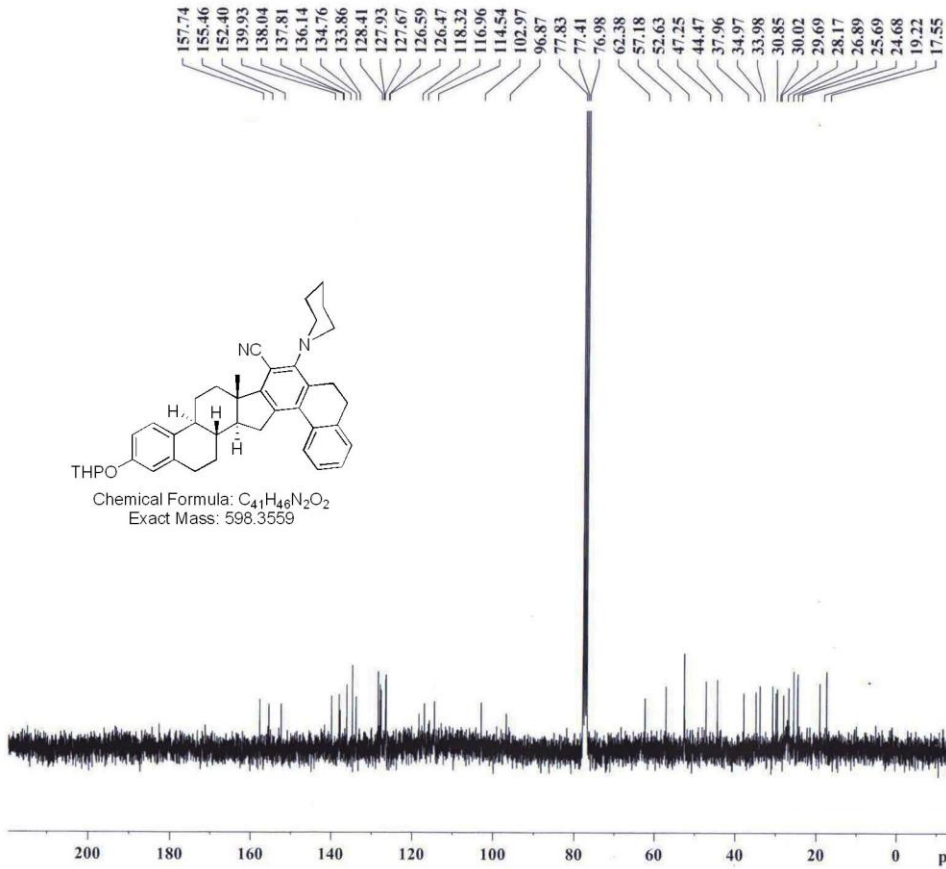

Current Data Parameters  
NAME atghmk274.p  
EXPNO 2  
PROCNO 1

F2 - Acquisition Parameters  
Date\_ 20140903  
Time 13.02  
INSTRUM spect  
PROBHD 5 mm Multinucl  
PULPROG zgpg30  
TD 65536  
SOLVENT CDCl3  
NS 904  
DS 4  
SWH 17985.611 Hz  
FIDRES 0.274439 Hz  
AQ 1.8219508 sec  
RG 32768  
DW 27.800 usec  
DE 6.00 usec  
TE 302.3 K  
D1 2.00000000 sec  
d11 0.03000000 sec  
DELTA 1.89999998 sec  
TD0 1

===== CHANNEL f1 =====  
NUC1 13C  
P1 12.00 usec  
PL1 -6.00 dB  
SFO1 75.4752950 MHz

===== CHANNEL f2 =====  
CPDPRG2 waltz16  
NUC2 1H  
PCPD2 80.00 usec  
PL2 4.00 dB  
PL12 25.00 dB  
PL13 29.00 dB  
SFO2 300.1312000 MHz

F2 - Processing parameters  
SI 32768  
SF 75.4677190 MHz  
WDW EM  
SSB 0  
LB 1.00 Hz  
GB 0  
PC 1.40



# RSC Advances

CIMAP-DEPT 135  
PROJECT NO. : ILP-13

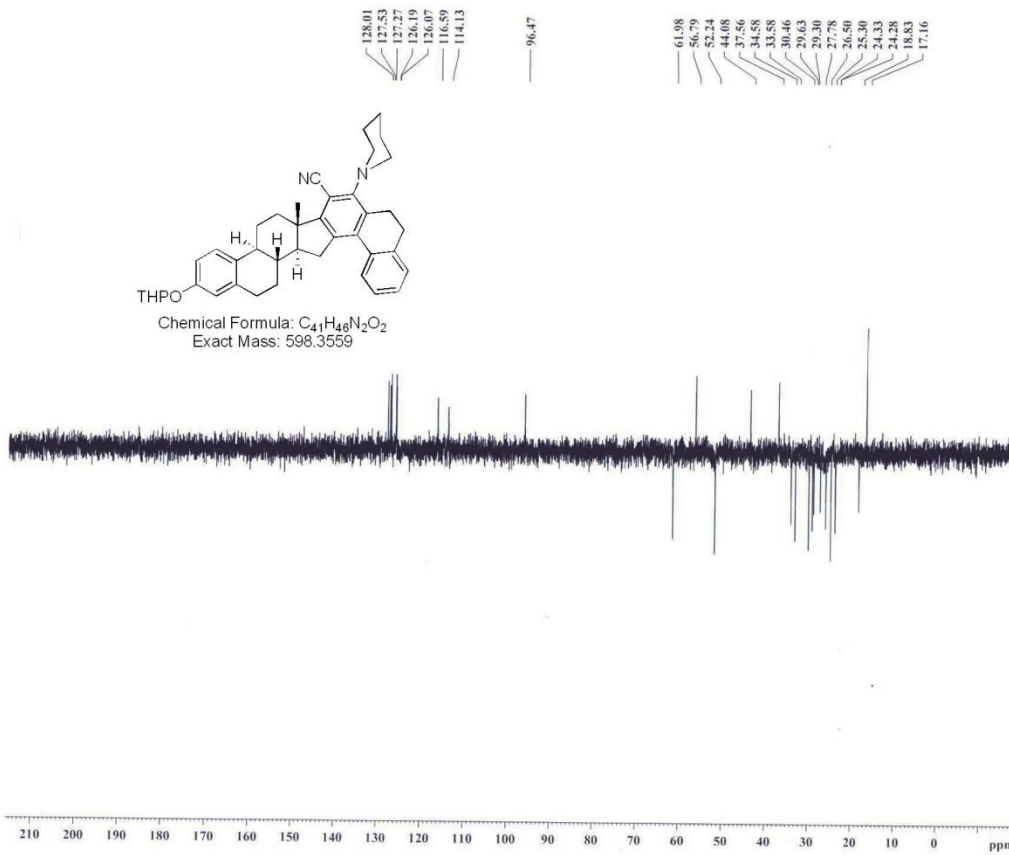

Current Data Parameters  
NAME atgmk274.p  
EXPNO 3  
PROCNO 1

F2 - Acquisition Parameters  
Date 20140903  
Time 14.00  
INSTRUM spect  
PROBHD 5 mm Multinucl  
PULPROG dep135  
TD 65536  
SOLVENT CDCl3  
NS 512  
DS 4  
SWH 17985.611 Hz  
FIDRES 0.274439 Hz  
AQ 1.8219508 sec  
RG 16384  
DW 27.800 usec  
DE 6.00 usec  
TE 302.6 K  
CNST2 137.0000000  
D1 2.00000000 sec  
d2 0.00364964 sec  
d12 0.00002000 sec  
DELTA 0.00001528 sec  
TD0 1

CHANNEL f1  
NUC1 13C  
P1 12.00 usec  
p2 24.00 usec  
PL1 -6.00 dB  
SFO1 75.4752953 MHz

CHANNEL f2  
CPDPRG2 waltz64  
NUC2 1H  
P3 7.15 usec  
p4 14.30 usec  
PCPD2 80.00 usec  
PL2 4.00 dB  
PL12 25.00 dB  
SFO2 300.1312005 MHz

F2 - Processing parameters  
SI 32768  
SF 75.4677490 MHz  
WDW EM  
SSB 0  
LB 1.00 Hz  
GB 0  
PC 1.40

Sample ID: NR-ATG-274  
Acquisition Date: 02/23/15 13:46:20

15123FEB48 #15-35 RT: 0.30-0.71 AV: 21 SB: 2 0.00, 0.00 NL: 6.99E8  
T: + c ESI Full ms [ 150.00-1500.00]

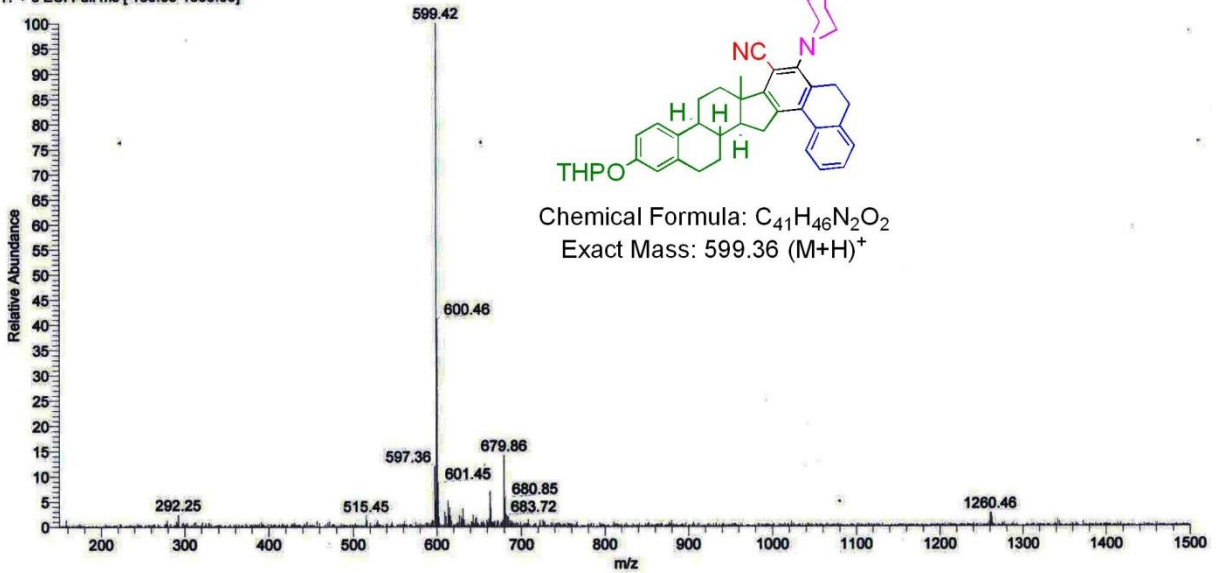

ION TRAP LCQ ADVANTAGE MAX  
THERMO ELECTRON CORPORATION

NCS-12B #4-19 RT: 0.02-0.14 AV: 16 NL: 7.42E5

T: FTMS (1,1) + p ESI Full ms [150.00-2000.00]

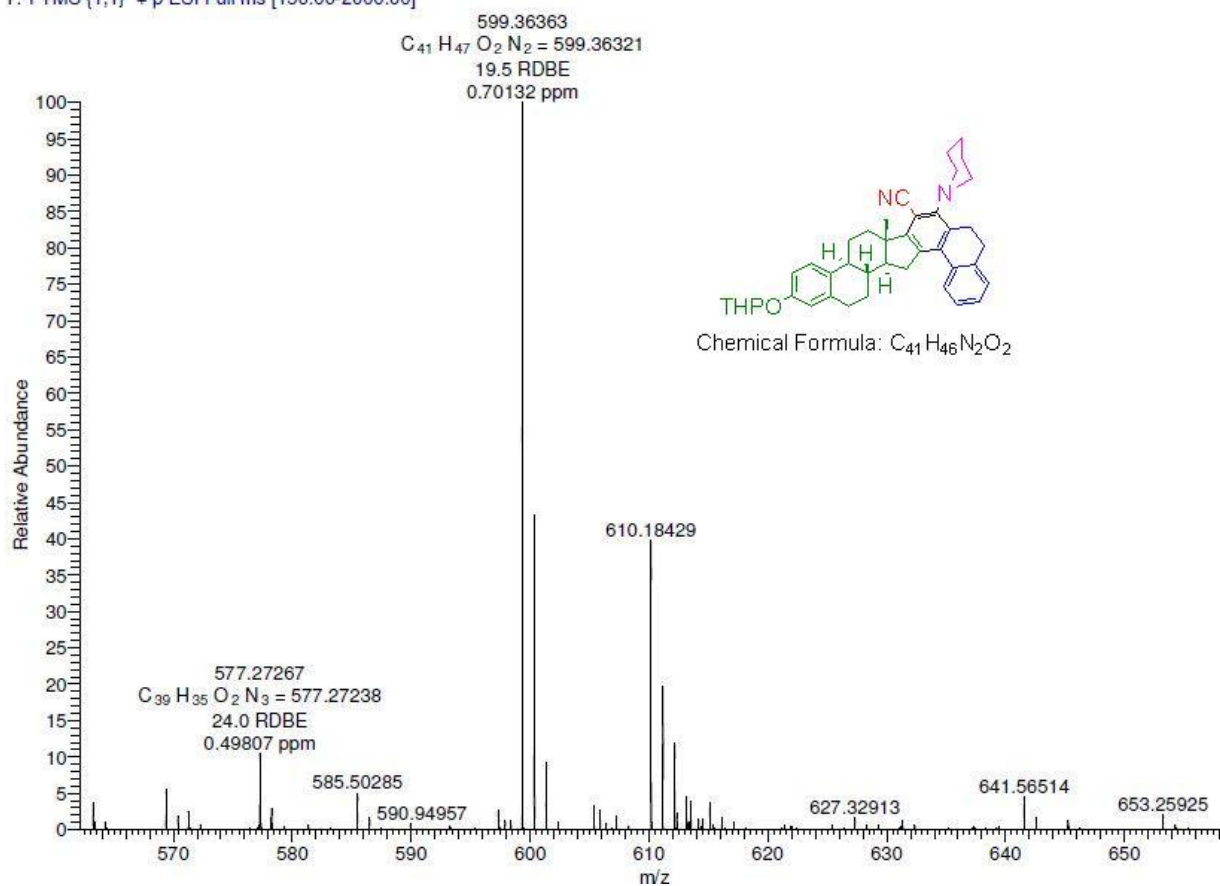

Supplement: c5ra11112a1.pdf [file c5ra11112a1.pdf]
